# Supplementary material for: Confirmation of gaseous methanediol from state-of-the-art theoretical rovibrational characterization
Source: Royal Society of Chemistry journal article supplement (doi:10.1039/d2cp02076a), 2022-01-01
Supplement: d2cp02076a1.pdf [file d2cp02076a1.pdf]

# Supplementary Information for Confirmation of Gaseous Methanediol from State-of-the-Art Theoretical Rovibrational Characterization

Megan C. Davis,<sup>a</sup> Noah R. Garrett,<sup>a</sup> and Ryan C. Fortenberry<sup>a‡</sup>

**Table S1** Included VPT2 Resonances and Polyads for both conformations of methanediol for F12-XZ-cCR Quartic Force Fields

|                             | C <sub>2</sub> methanediol                                             | C <sub>s</sub> methanediol                                                                |
|-----------------------------|------------------------------------------------------------------------|-------------------------------------------------------------------------------------------|
| Fermi Resonances            |                                                                        |                                                                                           |
|                             | $\nu_{15} + \nu_{13} = \nu_{10}$                                       | $\nu_{15} + \nu_2 = \nu_1$                                                                |
|                             | $\nu_{14} + \nu_{13} = \nu_{11}$                                       | $\nu_{15} + \nu_{12} = \nu_{10}$                                                          |
|                             | $\nu_{15} + \nu_{13} = \nu_{12}$                                       | $2\nu_{13} = \nu_{14} + \nu_{13} = \nu_{11}$                                              |
|                             | $2\nu_{14} = 2\nu_{15} = \nu_{13}$                                     | $\nu_{14} + \nu_{13} = \nu_{12}$                                                          |
|                             | $\nu_6 + \nu_5 = \nu_8 + \nu_5 = \nu_3$                                | $2\nu_{15} = \nu_{14}$                                                                    |
|                             | $2\nu_5 = 2\nu_6 = \nu_7 + \nu_5 = \nu_4$                              | $2\nu_5 = \nu_7 + \nu_5 = \nu_3$                                                          |
|                             | $\nu_{14} + \nu_9 = \nu_{15} + \nu_{12} = \nu_5$                       | $2\nu_5 = 2\nu_6 = 2\nu_7 = \nu_7 + \nu_5 = \nu_8 + \nu_6 = \nu_4$                        |
|                             | $\nu_{14} + \nu_{10} = \nu_{15} + \nu_9 = \nu_{15} + \nu_{11} = \nu_6$ | $\nu_{14} + \nu_{12} = \nu_{15} + \nu_8 = \nu_{15} + \nu_9 = \nu_5$                       |
|                             | $\nu_{14} + \nu_9 = \nu_{14} + \nu_{11} = \nu_{15} + \nu_{10} = \nu_7$ | $\nu_{13} + \nu_{10} = \nu_{14} + \nu_9 = \nu_{14} + \nu_{10} = \nu_{15} + \nu_7 = \nu_6$ |
|                             | $\nu_{15} + \nu_{11} = \nu_8$                                          | $\nu_{14} + \nu_{11} = \nu_{15} + \nu_8 = \nu_{15} + \nu_{10} = \nu_7$                    |
|                             | $2\nu_{13} = \nu_{15} + \nu_{12} = \nu_9$                              | $\nu_{14} + \nu_{10} = \nu_{15} + \nu_{11} = \nu_8$                                       |
|                             |                                                                        | $\nu_{15} + \nu_{11} = \nu_{15} + \nu_{12} = \nu_9$                                       |
| Darling-Dennison Resonances |                                                                        |                                                                                           |
|                             | $2\nu_2 = 2\nu_1$                                                      | $2\nu_2 = 2\nu_1$                                                                         |
|                             | $2\nu_4 = 2\nu_3$                                                      | $2\nu_4 = 2\nu_3$                                                                         |
|                             | $2\nu_6 = 2\nu_5$                                                      | $2\nu_6 = 2\nu_5$                                                                         |
|                             | $2\nu_7 = 2\nu_5$                                                      | $2\nu_7 = 2\nu_5$                                                                         |
|                             | $2\nu_7 = 2\nu_6$                                                      | $2\nu_7 = 2\nu_6$                                                                         |
|                             | $2\nu_8 = 2\nu_6$                                                      | $2\nu_8 = 2\nu_5$                                                                         |
|                             | $2\nu_8 = 2\nu_7$                                                      | $2\nu_8 = 2\nu_6$                                                                         |
|                             | $2\nu_{10} = 2\nu_9$                                                   | $2\nu_8 = 2\nu_7$                                                                         |
|                             | $2\nu_{11} = 2\nu_{10}$                                                | $2\nu_{10} = 2\nu_9$                                                                      |
|                             | $2\nu_{12} = 2\nu_{10}$                                                | $2\nu_{11} = 2\nu_9$                                                                      |
|                             | $2\nu_{12} = 2\nu_{11}$                                                | $2\nu_{11} = 2\nu_{10}$                                                                   |
|                             |                                                                        | $2\nu_{12} = 2\nu_{10}$                                                                   |
|                             |                                                                        | $2\nu_{12} = 2\nu_{11}$                                                                   |
| Coriolis Resonances         |                                                                        |                                                                                           |
| B-type                      |                                                                        |                                                                                           |
|                             | $\nu_7 = \nu_5$                                                        | $\nu_8 = \nu_5$                                                                           |
|                             | $\nu_{12} = \nu_{10}$                                                  |                                                                                           |
| C-type                      |                                                                        |                                                                                           |
|                             | $\nu_6 = \nu_5$                                                        | $\nu_6 = \nu_5$                                                                           |
|                             | $\nu_8 = \nu_5$                                                        | $\nu_8 = \nu_5$                                                                           |
|                             | $\nu_{10} = \nu_9$                                                     | $\nu_8 = \nu_7$                                                                           |
|                             | $\nu_{11} = \nu_{10}$                                                  | $\nu_{11} = \nu_{10}$                                                                     |
|                             | $\nu_{12} = \nu_9$                                                     | $\nu_{12} = \nu_9$                                                                        |

<sup>a</sup>Department of Chemistry & Biochemistry, University of Mississippi, University, MS, 38677-1848, USA

<sup>‡</sup>E-mail: r410@olemiss.edu

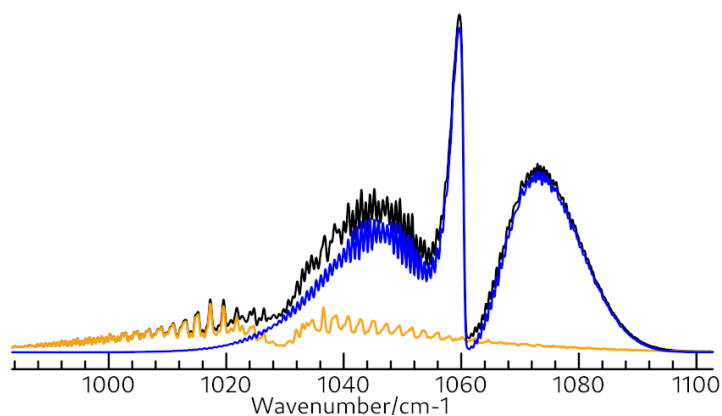

**Figure S1** F12-TZ-cCR spectra for  $\nu_{10}$  O-C-O antisym stretch (blue),  $\nu_{11}$  sym stretch (yellow), and combined (black)

**Table S2**  $C_2$  Methanediol Harmonic Vibrational Frequencies

| Mode             | Description            | F12-TZ-cCR | F12-DZ-cCR | Int. |
|------------------|------------------------|------------|------------|------|
| $\omega_1(a)$    | sym. OH stret.         | 3836.3     | 3839.9     | 34   |
| $\omega_2(b)$    | anti. OH stret.        | 3836.1     | 3839.7     | 58   |
| $\omega_3(b)$    | anti. CH stret.        | 3116.5     | 3114.6     | 28   |
| $\omega_4(a)$    | sym. CH stret.         | 3061.5     | 3061.0     | 48   |
| $\omega_5(a)$    | CH <sub>2</sub> sciss. | 1546.2     | 1547.7     | 1    |
| $\omega_6(b)$    | CH <sub>2</sub> wag    | 1460.6     | 1462.9     | 46   |
| $\omega_7(a)$    | CH <sub>2</sub> twist  | 1408.1     | 1410.5     | 2    |
| $\omega_8(b)$    | anti. COH bend         | 1387.0     | 1389.3     | 30   |
| $\omega_9(a)$    | sym. COH bend          | 1221.8     | 1222.6     | 2    |
| $\omega_{10}(b)$ | anti. OCO stret.       | 1097.9     | 1096.3     | 266  |
| $\omega_{11}(a)$ | sym. OCO stret.        | 1057.5     | 1056.6     | 96   |
| $\omega_{12}(b)$ | CH rock                | 1022.1     | 1022.1     | 17   |
| $\omega_{13}(a)$ | OCO bend               | 566.8      | 566.7      | 63   |
| $\omega_{14}(a)$ | sym. COH torsion       | 379.4      | 377.7      | 55   |
| $\omega_{15}(b)$ | anti. COH torsion      | 369.3      | 369.0      | 164  |

Vibrational frequencies given in  $\text{cm}^{-1}$ . Harmonic intensities given in  $\text{km/mol}$  calculated at the MP2/aug-cc-pVTZ level

**Table S3**  $C_3$  Methanediol Harmonic Vibrational Frequencies

| Mode               | Description            | F12-TZ-cCR | F12-DZ-cCR | Int. |
|--------------------|------------------------|------------|------------|------|
| $\omega_1(a'')$    | anti. OH stret.        | 3852.4     | 3855.7     | 21   |
| $\omega_2(a')$     | sym. OH stret.         | 3850.4     | 3853.7     | 55   |
| $\omega_3(a')$     | CH <sub>2</sub> stret. | 3154.7     | 3153.6     | 17   |
| $\omega_4(a')$     | CH <sub>1</sub> stret. | 3027.1     | 3025.8     | 58   |
| $\omega_5(a')$     | CH <sub>2</sub> sciss. | 1533.5     | 1535.1     | 1    |
| $\omega_6(a'')$    | CH <sub>2</sub> wag    | 1452.2     | 1454.5     | 24   |
| $\omega_7(a')$     | CH <sub>2</sub> twist  | 1428.5     | 1431.1     | 18   |
| $\omega_8(a'')$    | COH bend               | 1389.0     | 1391.5     | 2    |
| $\omega_9(a'')$    | COH bend               | 1179.5     | 1181.4     | 61   |
| $\omega_{10}(a'')$ | anti. OCO stret.       | 1091.8     | 1090.1     | 310  |
| $\omega_{11}(a')$  | sym. OCO stret.        | 1080.5     | 1079.1     | 37   |
| $\omega_{12}(a')$  | CH <sub>2</sub> rock   | 1010.3     | 1010.4     | 47   |
| $\omega_{13}(a')$  | OCO bend               | 545.5      | 545.1      | 25   |
| $\omega_{14}(a')$  | sym. COH torsion       | 382.3      | 379.9      | 116  |
| $\omega_{15}(a'')$ | anti. COH torsion      | 170.3      | 166.3      | 72   |

Vibrational frequencies given in  $\text{cm}^{-1}$ . Harmonic intensities given in  $\text{km/mol}$  calculated at the MP2/aug-cc-pVTZ level

**Table S4** C<sub>s</sub> Methanediol Geometry

| Parameter                 | Units | F12-TZ-cCR | F12-DZ-cCR |
|---------------------------|-------|------------|------------|
| r <sub>0</sub> (C1-H2)    | Å     | 1.104      | 1.105      |
| r <sub>0</sub> (C1-H3)    | Å     | 1.095      | 1.096      |
| r <sub>0</sub> (C1-O4)    | Å     | 1.410      | 1.411      |
| r <sub>0</sub> (C1-O5)    | Å     | 1.410      | 1.411      |
| r <sub>0</sub> (O4-H6)    | Å     | 0.932      | 0.931      |
| r <sub>0</sub> (O5-H7)    | Å     | 0.932      | 0.931      |
| ∠ <sub>0</sub> (C1-H2-H3) | deg   | 109.834    | 109.816    |
| ∠ <sub>0</sub> (C1-O4-H2) | deg   | 110.575    | 110.573    |
| ∠ <sub>0</sub> (C1-O5-H3) | deg   | 106.336    | 106.351    |
| ∠ <sub>0</sub> (O4-C1-H6) | deg   | 110.050    | 109.940    |
| ∠ <sub>0</sub> (O5-C1-H7) | deg   | 110.050    | 109.940    |

**Table S5** C<sub>s</sub> Methanediol Rotational Constants

| Parameter       | Units | F12-TZ-cCR | F12-DZ-cCR |
|-----------------|-------|------------|------------|
| A <sub>e</sub>  | MHz   | 43513.4    | 43475.3    |
| B <sub>e</sub>  | MHz   | 9992.7     | 9975.3     |
| C <sub>e</sub>  | MHz   | 8978.5     | 8964.4     |
| A <sub>0</sub>  | MHz   | 42821.6    | 42772.7    |
| B <sub>0</sub>  | MHz   | 9972.1     | 9957.7     |
| C <sub>0</sub>  | MHz   | 8912       | 8899.2     |
| A <sub>1</sub>  | MHz   | 42679.7    | 42630.6    |
| B <sub>1</sub>  | MHz   | 9965.3     | 9951.2     |
| C <sub>1</sub>  | MHz   | 8906.5     | 8893.8     |
| A <sub>2</sub>  | MHz   | 42680.3    | 42631.1    |
| B <sub>2</sub>  | MHz   | 9965.7     | 9951.6     |
| C <sub>2</sub>  | MHz   | 8906.8     | 8894.1     |
| A <sub>3</sub>  | MHz   | 42755.7    | 42707.1    |
| B <sub>3</sub>  | MHz   | 9977.2     | 9962.8     |
| C <sub>3</sub>  | MHz   | 8917.2     | 8904.4     |
| A <sub>4</sub>  | MHz   | 42725.4    | 42676.6    |
| B <sub>4</sub>  | MHz   | 9980.8     | 9966.5     |
| C <sub>4</sub>  | MHz   | 8920.3     | 8907.6     |
| A <sub>5</sub>  | MHz   | 42719      | 42670.4    |
| B <sub>5</sub>  | MHz   | 9985.8     | 9971.3     |
| C <sub>5</sub>  | MHz   | 8904.9     | 8892       |
| A <sub>6</sub>  | MHz   | 42713.3    | 42664.4    |
| B <sub>6</sub>  | MHz   | 9986.8     | 9972.6     |
| C <sub>6</sub>  | MHz   | 8906.8     | 8893.9     |
| A <sub>7</sub>  | MHz   | 42932.3    | 42881.5    |
| B <sub>7</sub>  | MHz   | 9946.5     | 9931.8     |
| C <sub>7</sub>  | MHz   | 8902.9     | 8890.1     |
| A <sub>8</sub>  | MHz   | 42658.3    | 42609.6    |
| B <sub>8</sub>  | MHz   | 9959.3     | 9944.8     |
| C <sub>8</sub>  | MHz   | 8918.4     | 8905.5     |
| A <sub>9</sub>  | MHz   | 42735.6    | 42683.9    |
| B <sub>9</sub>  | MHz   | 9975.1     | 9960.8     |
| C <sub>9</sub>  | MHz   | 8916.3     | 8903.5     |
| A <sub>10</sub> | MHz   | 42489.8    | 42442.1    |
| B <sub>10</sub> | MHz   | 9979.9     | 9968.3     |
| C <sub>10</sub> | MHz   | 8864.6     | 8852.4     |
| A <sub>11</sub> | MHz   | 42925.2    | 42884.4    |
| B <sub>11</sub> | MHz   | 9862.5     | 9846       |
| C <sub>11</sub> | MHz   | 8867.5     | 8854.9     |
| A <sub>12</sub> | MHz   | 42621.7    | 42566      |
| B <sub>12</sub> | MHz   | 9937.1     | 9922.8     |
| C <sub>12</sub> | MHz   | 8882.6     | 8869.4     |
| A <sub>13</sub> | MHz   | 43066.5    | 43017.4    |
| B <sub>13</sub> | MHz   | 9951.7     | 9937.2     |
| C <sub>13</sub> | MHz   | 8882.9     | 8870.1     |
| A <sub>14</sub> | MHz   | 42765.4    | 42716.5    |
| B <sub>14</sub> | MHz   | 9993       | 9979       |
| C <sub>14</sub> | MHz   | 8907.4     | 8894.7     |
| A <sub>15</sub> | MHz   | 42472.2    | 42402.8    |
| B <sub>15</sub> | MHz   | 10074.1    | 10064.2    |
| C <sub>15</sub> | MHz   | 8942.5     | 8931.2     |

**Table S6**  $C_s$  Methanediol Distortion Constants

| Parameter     | Units | F12-TZ-cCR | F12-DZ-cCR |
|---------------|-------|------------|------------|
| $\Delta_J$    | kHz   | 9.26       | 9.254      |
| $\Delta_K$    | kHz   | 390.245    | 389.294    |
| $\Delta_{JK}$ | kHz   | 2.816      | 4.906      |
| $\delta_J$    | kHz   | 1.657      | 1.66       |
| $\delta_{JK}$ | kHz   | 4.091      | 3.301      |
| $\Phi_J$      | mHz   | 15.977     | 16.175     |
| $\Phi_K$      | Hz    | 31.703     | 33.636     |
| $\Phi_{JK}$   | Hz    | 1.215      | 1.324      |
| $\Phi_{KJ}$   | Hz    | -21.264    | -23.255    |
| $\phi_j$      | mHz   | 7.126      | 7.218      |
| $\phi_{jk}$   | mHz   | 267.098    | 278.348    |
| $\phi_k$      | Hz    | 3.995      | 3.488      |
| $\mu_x$       | D     | 0.06       |            |
| $\mu_y$       | D     | 2.72       |            |
| $\mu$         | D     | 2.72       |            |

**Table S7** C<sub>2</sub> methanediol force constants in mdyne/Å<sup>n</sup>rad<sup>m</sup> with coordinates matching those from Eqs. 1-15 of the main text.

|                        | F12-TZ-cCR      | F12-DZ-cCR      |
|------------------------|-----------------|-----------------|
| F <sub>1,1,0,0</sub>   | 5.317606677994  | 5.316555202899  |
| F <sub>2,1,0,0</sub>   | 0.393907393187  | 0.396038000262  |
| F <sub>2,2,0,0</sub>   | 6.269223747892  | 6.252227060585  |
| F <sub>3,1,0,0</sub>   | -0.027068532695 | -0.026758021886 |
| F <sub>3,2,0,0</sub>   | -0.002159656370 | 0.000579050786  |
| F <sub>3,3,0,0</sub>   | 8.235017863768  | 8.250676335740  |
| F <sub>4,1,0,0</sub>   | 0.092345412568  | 0.094152368816  |
| F <sub>4,2,0,0</sub>   | -0.324413045134 | -0.323884633782 |
| F <sub>4,3,0,0</sub>   | -0.072845992959 | -0.072531032742 |
| F <sub>4,4,0,0</sub>   | 1.052316767369  | 1.054392584787  |
| F <sub>5,1,0,0</sub>   | -0.016836169083 | -0.016234516071 |
| F <sub>5,2,0,0</sub>   | -0.173515525058 | -0.173883973252 |
| F <sub>5,3,0,0</sub>   | -0.024733327488 | -0.024401583941 |
| F <sub>5,4,0,0</sub>   | 0.229738821316  | 0.230051440783  |
| F <sub>5,5,0,0</sub>   | 1.511494186812  | 1.511863482050  |
| F <sub>6,1,0,0</sub>   | 0.031474430081  | 0.031573988381  |
| F <sub>6,2,0,0</sub>   | 0.375462228480  | 0.376717961514  |
| F <sub>6,3,0,0</sub>   | 0.169357584839  | 0.171239798428  |
| F <sub>6,4,0,0</sub>   | -0.059384695608 | -0.060117714145 |
| F <sub>6,5,0,0</sub>   | 0.016502073135  | 0.014505080134  |
| F <sub>6,6,0,0</sub>   | 0.793938460028  | 0.797717957679  |
| F <sub>7,1,0,0</sub>   | -0.078135288738 | -0.079251212094 |
| F <sub>7,2,0,0</sub>   | 0.291938068034  | 0.292591598879  |
| F <sub>7,3,0,0</sub>   | -0.125520199814 | -0.125992906665 |
| F <sub>7,4,0,0</sub>   | 0.524391559154  | 0.524899851055  |
| F <sub>7,5,0,0</sub>   | -0.736166815615 | -0.734006129289 |
| F <sub>7,6,0,0</sub>   | -0.197933492837 | -0.197205917930 |
| F <sub>7,7,0,0</sub>   | 2.412376426502  | 2.412230361544  |
| F <sub>8,1,0,0</sub>   | 0.011271796232  | 0.011226760648  |
| F <sub>8,2,0,0</sub>   | -0.016864012308 | -0.017092032617 |
| F <sub>8,3,0,0</sub>   | 0.033790582230  | 0.033501457561  |
| F <sub>8,4,0,0</sub>   | -0.060584027838 | -0.060160526865 |
| F <sub>8,5,0,0</sub>   | -0.001017215637 | 0.000649160401  |
| F <sub>8,6,0,0</sub>   | -0.035191369952 | -0.034866598265 |
| F <sub>8,7,0,0</sub>   | -0.015023496885 | -0.015943845260 |
| F <sub>8,8,0,0</sub>   | 0.083361882931  | 0.082796280244  |
| F <sub>9,9,0,0</sub>   | 5.201663236901  | 5.195899423093  |
| F <sub>10,10,0,0</sub> | 4.848948733640  | 4.835555698229  |
| F <sub>10,9,0,0</sub>  | 0.024866084712  | 0.024971259086  |
| F <sub>11,10,0,0</sub> | 0.020309833196  | 0.023256888527  |
| F <sub>11,11,0,0</sub> | 8.231200349055  | 8.246755313197  |
| F <sub>11,9,0,0</sub>  | 0.030334855962  | 0.030312056429  |
| F <sub>12,10,0,0</sub> | 0.165391783754  | 0.165556443800  |
| F <sub>12,11,0,0</sub> | -0.093831246484 | -0.094225176321 |
| F <sub>12,12,0,0</sub> | 1.390124943901  | 1.392418300915  |
| F <sub>12,9,0,0</sub>  | 0.155357540766  | 0.156678814817  |
| F <sub>13,10,0,0</sub> | 0.369698118545  | 0.371028011713  |
| F <sub>13,11,0,0</sub> | 0.160407679980  | 0.162275882066  |
| F <sub>13,12,0,0</sub> | -0.125136798063 | -0.125777121845 |

|                        |                  |                  |
|------------------------|------------------|------------------|
| F <sub>13,13,0,0</sub> | 0.787150617766   | 0.790782427529   |
| F <sub>13,9,0,0</sub>  | -0.030168843021  | -0.030807312847  |
| F <sub>14,10,0,0</sub> | -0.469125991887  | -0.469293830299  |
| F <sub>14,11,0,0</sub> | -0.055456848158  | -0.055648769101  |
| F <sub>14,12,0,0</sub> | 0.545690968992   | 0.546739623033   |
| F <sub>14,13,0,0</sub> | -0.129555935774  | -0.129794879539  |
| F <sub>14,14,0,0</sub> | 0.691109056276   | 0.693409818577   |
| F <sub>14,9,0,0</sub>  | 0.117948938949   | 0.118605342097   |
| F <sub>15,10,0,0</sub> | -0.013924284637  | -0.013456066399  |
| F <sub>15,11,0,0</sub> | 0.014697446777   | 0.014906267678   |
| F <sub>15,12,0,0</sub> | 0.017271306659   | 0.018340097156   |
| F <sub>15,13,0,0</sub> | -0.037079939841  | -0.036766791353  |
| F <sub>15,14,0,0</sub> | 0.036390661216   | 0.036615314880   |
| F <sub>15,15,0,0</sub> | 0.057002648094   | 0.056906803244   |
| F <sub>15,9,0,0</sub>  | 0.008161704844   | 0.008252005103   |
| F <sub>1,1,1,0</sub>   | -21.727979284247 | -21.783691786547 |
| F <sub>2,1,1,0</sub>   | 0.323460790470   | 0.318462227633   |
| F <sub>2,2,1,0</sub>   | -1.449514503444  | -1.441228715705  |
| F <sub>2,2,2,0</sub>   | -26.263115948893 | -26.122084637796 |
| F <sub>3,1,1,0</sub>   | -0.023695024310  | -0.022959058088  |
| F <sub>3,2,1,0</sub>   | 0.012753434307   | 0.012478791469   |
| F <sub>3,2,2,0</sub>   | -0.499454041619  | -0.494454936104  |
| F <sub>3,3,1,0</sub>   | 0.009741264237   | 0.010956908457   |
| F <sub>3,3,2,0</sub>   | 0.275442715152   | 0.275048349821   |
| F <sub>3,3,3,0</sub>   | -40.932040013943 | -40.997667050269 |
| F <sub>4,1,1,0</sub>   | -0.231806176188  | -0.240133743099  |
| F <sub>4,2,1,0</sub>   | 0.292112452803   | 0.293327052002   |
| F <sub>4,2,2,0</sub>   | 0.065464164980   | 0.065619641674   |
| F <sub>4,3,1,0</sub>   | 0.000210631129   | 0.000028465857   |
| F <sub>4,3,2,0</sub>   | 0.193475601944   | 0.191920641366   |
| F <sub>4,3,3,0</sub>   | -0.027614138726  | -0.027886626957  |
| F <sub>4,4,1,0</sub>   | -0.541197702856  | -0.543381208825  |
| F <sub>4,4,2,0</sub>   | -0.487846401495  | -0.483890225168  |
| F <sub>4,4,3,0</sub>   | -0.106087316728  | -0.104817843316  |
| F <sub>4,4,4,0</sub>   | 0.448875115031   | 0.437621422530   |
| F <sub>5,1,1,0</sub>   | 0.124020475173   | 0.121822648149   |
| F <sub>5,2,1,0</sub>   | -0.134710929194  | -0.137188845374  |
| F <sub>5,2,2,0</sub>   | 0.955232415414   | 0.956592062377   |
| F <sub>5,3,1,0</sub>   | -0.008194237843  | -0.008529917647  |
| F <sub>5,3,2,0</sub>   | 0.028456275101   | 0.027518764942   |
| F <sub>5,3,3,0</sub>   | 0.019902174790   | 0.018318487802   |
| F <sub>5,4,1,0</sub>   | -0.168953023266  | -0.169119445321  |
| F <sub>5,4,2,0</sub>   | 0.080505123295   | 0.084052853348   |
| F <sub>5,4,3,0</sub>   | -0.089667964576  | -0.087476343453  |
| F <sub>5,4,4,0</sub>   | 0.890957944645   | 0.887894459515   |
| F <sub>5,5,1,0</sub>   | -0.364221782173  | -0.368108904456  |
| F <sub>5,5,2,0</sub>   | -1.969797141434  | -1.972907021612  |
| F <sub>5,5,3,0</sub>   | -0.015598010430  | -0.013317994226  |
| F <sub>5,5,4,0</sub>   | -0.574130194041  | -0.581159502162  |
| F <sub>5,5,5,0</sub>   | -0.675475792426  | -0.685926976827  |
| F <sub>6,1,1,0</sub>   | 0.041829795311   | 0.042169209202   |
| F <sub>6,2,1,0</sub>   | -0.045032255864  | -0.044655559192  |

|                      |                 |                 |
|----------------------|-----------------|-----------------|
| F <sub>6,2,2,0</sub> | -0.458383354902 | -0.461922364585 |
| F <sub>6,3,1,0</sub> | -0.006081860756 | -0.004576776474 |
| F <sub>6,3,2,0</sub> | -0.282314161296 | -0.282279855076 |
| F <sub>6,3,3,0</sub> | -0.003732961947 | -0.011139039791 |
| F <sub>6,4,1,0</sub> | 0.040566816066  | 0.041130837827  |
| F <sub>6,4,2,0</sub> | -0.126359113235 | -0.126323368803 |
| F <sub>6,4,3,0</sub> | 0.055918932835  | 0.053984384348  |
| F <sub>6,4,4,0</sub> | -0.130535786319 | -0.127043703678 |
| F <sub>6,5,1,0</sub> | 0.011979202169  | 0.011824654285  |
| F <sub>6,5,2,0</sub> | -0.094345245554 | -0.093473593599 |
| F <sub>6,5,3,0</sub> | 0.032128210044  | 0.029919014271  |
| F <sub>6,5,4,0</sub> | -0.062399427431 | -0.058896642586 |
| F <sub>6,5,5,0</sub> | 0.002504082496  | 0.003510139739  |
| F <sub>6,6,1,0</sub> | -0.042770126676 | -0.041708170349 |
| F <sub>6,6,2,0</sub> | -0.570976593271 | -0.574391326396 |
| F <sub>6,6,3,0</sub> | -0.108352441157 | -0.106083445557 |
| F <sub>6,6,4,0</sub> | 0.020182203995  | 0.019428629907  |
| F <sub>6,6,5,0</sub> | 0.012682306739  | 0.011762131457  |
| F <sub>6,6,6,0</sub> | -0.682061100215 | -0.679666584919 |
| F <sub>7,1,1,0</sub> | -0.172296202095 | -0.171569022329 |
| F <sub>7,2,1,0</sub> | 0.413253490706  | 0.415433864994  |
| F <sub>7,2,2,0</sub> | -1.969883303713 | -1.971272940897 |
| F <sub>7,3,1,0</sub> | -0.021193479409 | -0.021275583871 |
| F <sub>7,3,2,0</sub> | 0.342706021902  | 0.343001729693  |
| F <sub>7,3,3,0</sub> | -0.054687509729 | -0.052949503131 |
| F <sub>7,4,1,0</sub> | -0.188960897875 | -0.191265178397 |
| F <sub>7,4,2,0</sub> | -0.517287267207 | -0.521725746891 |
| F <sub>7,4,3,0</sub> | -0.104876491436 | -0.106729248631 |
| F <sub>7,4,4,0</sub> | 0.671385890706  | 0.677215989701  |
| F <sub>7,5,1,0</sub> | -0.082532240052 | -0.082143624835 |
| F <sub>7,5,2,0</sub> | 1.947343194628  | 1.946569538801  |
| F <sub>7,5,3,0</sub> | -0.132895805927 | -0.133733411898 |
| F <sub>7,5,4,0</sub> | 1.196637308777  | 1.206927928975  |
| F <sub>7,5,5,0</sub> | -0.525340607437 | -0.522193239983 |
| F <sub>7,6,1,0</sub> | 0.064709126866  | 0.065539156049  |
| F <sub>7,6,2,0</sub> | -0.010120408181 | -0.010815962534 |
| F <sub>7,6,3,0</sub> | 0.002778841913  | 0.003621623704  |
| F <sub>7,6,4,0</sub> | -0.180297188202 | -0.183300179131 |
| F <sub>7,6,5,0</sub> | -0.111832273254 | -0.112944702519 |
| F <sub>7,6,6,0</sub> | 0.097521009035  | 0.096523629832  |
| F <sub>7,7,1,0</sub> | -0.191614026089 | -0.191555212143 |
| F <sub>7,7,2,0</sub> | -4.434834320899 | -4.434811370037 |
| F <sub>7,7,3,0</sub> | 0.094380289410  | 0.095974577162  |
| F <sub>7,7,4,0</sub> | 0.790846565582  | 0.782950220981  |
| F <sub>7,7,5,0</sub> | 2.226863550997  | 2.228366516203  |
| F <sub>7,7,6,0</sub> | 0.045336126513  | 0.045604706801  |
| F <sub>7,7,7,0</sub> | -4.140956157969 | -4.143445894089 |
| F <sub>8,1,1,0</sub> | -0.004360677696 | -0.004252426201 |
| F <sub>8,2,1,0</sub> | -0.031092739161 | -0.031433105057 |
| F <sub>8,2,2,0</sub> | 0.175356127731  | 0.175034705734  |
| F <sub>8,3,1,0</sub> | 0.015938283688  | 0.015988678243  |
| F <sub>8,3,2,0</sub> | -0.083558466308 | -0.082344386598 |

|                        |                  |                  |
|------------------------|------------------|------------------|
| F <sub>8,3,3,0</sub>   | -0.011590916269  | -0.011490336197  |
| F <sub>8,4,1,0</sub>   | 0.000400667518   | 0.000325502626   |
| F <sub>8,4,2,0</sub>   | 0.089775819710   | 0.085984836680   |
| F <sub>8,4,3,0</sub>   | -0.006822746156  | -0.007531573625  |
| F <sub>8,4,4,0</sub>   | -0.214945520619  | -0.210185734927  |
| F <sub>8,5,1,0</sub>   | 0.028971539000   | 0.029200545105   |
| F <sub>8,5,2,0</sub>   | -0.068342184359  | -0.072217162770  |
| F <sub>8,5,3,0</sub>   | -0.068158100961  | -0.069733180523  |
| F <sub>8,5,4,0</sub>   | -0.135895663637  | -0.128581346946  |
| F <sub>8,5,5,0</sub>   | -0.097384271426  | -0.086788976052  |
| F <sub>8,6,1,0</sub>   | 0.001964227750   | 0.001746368603   |
| F <sub>8,6,2,0</sub>   | 0.100057046108   | 0.101432601359   |
| F <sub>8,6,3,0</sub>   | -0.096440428939  | -0.094747650457  |
| F <sub>8,6,4,0</sub>   | 0.047366786850   | 0.042476894990   |
| F <sub>8,6,5,0</sub>   | -0.099525275495  | -0.103233703602  |
| F <sub>8,6,6,0</sub>   | 0.042958240822   | 0.044274493203   |
| F <sub>8,7,1,0</sub>   | -0.010364300583  | -0.010670769881  |
| F <sub>8,7,2,0</sub>   | 0.060184073376   | 0.062377450786   |
| F <sub>8,7,3,0</sub>   | 0.070502415159   | 0.074057678628   |
| F <sub>8,7,4,0</sub>   | -0.088376991609  | -0.095539571844  |
| F <sub>8,7,5,0</sub>   | 0.018707689712   | 0.008869085731   |
| F <sub>8,7,6,0</sub>   | 0.186873012633   | 0.190503712619   |
| F <sub>8,7,7,0</sub>   | 0.068731616318   | 0.076208695488   |
| F <sub>8,8,1,0</sub>   | -0.017883588719  | -0.017405983226  |
| F <sub>8,8,2,0</sub>   | -0.112565152048  | -0.107937523867  |
| F <sub>8,8,3,0</sub>   | 0.036223942822   | 0.037874270278   |
| F <sub>8,8,4,0</sub>   | 0.135572724157   | 0.128892434225   |
| F <sub>8,8,5,0</sub>   | 0.117129333419   | 0.106558626587   |
| F <sub>8,8,6,0</sub>   | -0.045725133683  | -0.040332139885  |
| F <sub>8,8,7,0</sub>   | 0.081495779057   | 0.089983315571   |
| F <sub>8,8,8,0</sub>   | -0.091314222593  | -0.081939558881  |
| F <sub>9,9,1,0</sub>   | -21.856093542529 | -21.909900624098 |
| F <sub>9,9,2,0</sub>   | 0.463579265141   | 0.464516558495   |
| F <sub>9,9,3,0</sub>   | -0.031903657638  | -0.030767839837  |
| F <sub>9,9,4,0</sub>   | 0.349015891246   | 0.344395499732   |
| F <sub>9,9,5,0</sub>   | 0.054910103173   | 0.051280416347   |
| F <sub>9,9,6,0</sub>   | 0.021959873966   | 0.022008929588   |
| F <sub>9,9,7,0</sub>   | -0.110770737972  | -0.107270797564  |
| F <sub>9,9,8,0</sub>   | 0.035087108512   | 0.035132001916   |
| F <sub>10,10,1,0</sub> | -1.140612767741  | -1.126549758965  |
| F <sub>10,10,2,0</sub> | -22.689908108068 | -22.572696676404 |
| F <sub>10,10,3,0</sub> | -0.611264438294  | -0.609219678427  |
| F <sub>10,10,4,0</sub> | 0.367673317774   | 0.369632736544   |
| F <sub>10,10,5,0</sub> | -0.512006829205  | -0.510722679956  |
| F <sub>10,10,6,0</sub> | -0.824256618802  | -0.825514965546  |
| F <sub>10,10,7,0</sub> | 0.674878992963   | 0.668907093398   |
| F <sub>10,10,8,0</sub> | -0.200854105947  | -0.201603838635  |
| F <sub>10,9,1,0</sub>  | 0.092616908217   | 0.092737285931   |
| F <sub>10,9,2,0</sub>  | -0.115150587106  | -0.114735183059  |
| F <sub>10,9,3,0</sub>  | -0.019248404571  | -0.019472006063  |
| F <sub>10,9,4,0</sub>  | -0.214752685152  | -0.214310485284  |
| F <sub>10,9,5,0</sub>  | -0.409322479290  | -0.412074813493  |



|                        |                  |                  |
|------------------------|------------------|------------------|
| F <sub>10,9,6,0</sub>  | 0.054478459990   | 0.054605514207   |
| F <sub>10,9,7,0</sub>  | -0.283884318108  | -0.285514904524  |
| F <sub>10,9,8,0</sub>  | -0.053222428389  | -0.053509090664  |
| F <sub>11,10,1,0</sub> | 0.025042008192   | 0.025554746921   |
| F <sub>11,10,2,0</sub> | -0.407989485495  | -0.406823535429  |
| F <sub>11,10,3,0</sub> | 0.177147563655   | 0.174493859955   |
| F <sub>11,10,4,0</sub> | 0.121953904246   | 0.121473573364   |
| F <sub>11,10,5,0</sub> | 0.090867560433   | 0.090641803281   |
| F <sub>11,10,6,0</sub> | -0.305215042938  | -0.306169803369  |
| F <sub>11,10,7,0</sub> | 0.198296635565   | 0.198307907171   |
| F <sub>11,10,8,0</sub> | -0.047678766617  | -0.047941851836  |
| F <sub>11,11,1,0</sub> | 0.004809661916   | 0.005903028620   |
| F <sub>11,11,2,0</sub> | 0.274693316210   | 0.273914887114   |
| F <sub>11,11,3,0</sub> | -40.917967528813 | -40.983335355332 |
| F <sub>11,11,4,0</sub> | -0.019094846305  | -0.019371086145  |
| F <sub>11,11,5,0</sub> | 0.004025302480   | 0.002692665000   |
| F <sub>11,11,6,0</sub> | 0.011385530881   | 0.004301917530   |
| F <sub>11,11,7,0</sub> | -0.036132397693  | -0.035273708861  |
| F <sub>11,11,8,0</sub> | -0.012518329562  | -0.012070859213  |
| F <sub>11,9,1,0</sub>  | -0.034607224674  | -0.035212729748  |
| F <sub>11,9,2,0</sub>  | -0.006627825274  | -0.006664611919  |
| F <sub>11,9,3,0</sub>  | 0.045760088542   | 0.046369775655   |
| F <sub>11,9,4,0</sub>  | -0.006424073604  | -0.006329218915  |
| F <sub>11,9,5,0</sub>  | -0.044093572764  | -0.044187770997  |
| F <sub>11,9,6,0</sub>  | -0.006371890248  | -0.007579852449  |
| F <sub>11,9,7,0</sub>  | 0.015910797906   | 0.017126689060   |
| F <sub>11,9,8,0</sub>  | 0.017897580874   | 0.018595037401   |
| F <sub>12,10,1,0</sub> | -0.116461298091  | -0.116984139357  |
| F <sub>12,10,2,0</sub> | -0.354693749869  | -0.358462942540  |
| F <sub>12,10,3,0</sub> | 0.124267179389   | 0.125064968872   |
| F <sub>12,10,4,0</sub> | -0.697070056685  | -0.696908133598  |
| F <sub>12,10,5,0</sub> | -1.324451849404  | -1.323535231541  |
| F <sub>12,10,6,0</sub> | -0.055626133918  | -0.055973366545  |
| F <sub>12,10,7,0</sub> | -0.031899171834  | -0.036643515090  |
| F <sub>12,10,8,0</sub> | -0.056420018708  | -0.055991262948  |
| F <sub>12,11,1,0</sub> | -0.034917337766  | -0.035426001326  |
| F <sub>12,11,2,0</sub> | 0.249456830913   | 0.250526206328   |
| F <sub>12,11,3,0</sub> | -0.021271306014  | -0.021669734241  |
| F <sub>12,11,4,0</sub> | -0.089265121730  | -0.088576594489  |
| F <sub>12,11,5,0</sub> | -0.053191695789  | -0.052932650914  |
| F <sub>12,11,6,0</sub> | 0.009155234000   | 0.010533825808   |
| F <sub>12,11,7,0</sub> | 0.012325010423   | 0.013960565831   |
| F <sub>12,11,8,0</sub> | -0.011057981011  | -0.009742829926  |
| F <sub>12,12,1,0</sub> | -0.170817444013  | -0.173174365134  |
| F <sub>12,12,2,0</sub> | -1.995325641703  | -1.993402404346  |
| F <sub>12,12,3,0</sub> | 0.014575169744   | 0.015624172096   |
| F <sub>12,12,4,0</sub> | 0.782990841563   | 0.779677756945   |
| F <sub>12,12,5,0</sub> | -0.032897420851  | -0.034756229077  |
| F <sub>12,12,6,0</sub> | -0.017141038697  | -0.019102884895  |
| F <sub>12,12,7,0</sub> | -0.860094753467  | -0.859511805868  |
| F <sub>12,12,8,0</sub> | 0.086060997221   | 0.084523539880   |
| F <sub>12,9,1,0</sub>  | 0.298596561726   | 0.293547542916   |

|                        |                 |                 |
|------------------------|-----------------|-----------------|
| F <sub>12,9,2,0</sub>  | -0.621890455553 | -0.623047839171 |
| F <sub>12,9,3,0</sub>  | -0.003413240025 | -0.002588519648 |
| F <sub>12,9,4,0</sub>  | 0.097051995995  | 0.094839748509  |
| F <sub>12,9,5,0</sub>  | -0.129063600030 | -0.133065118645 |
| F <sub>12,9,6,0</sub>  | -0.025916916146 | -0.027704973074 |
| F <sub>12,9,7,0</sub>  | 0.123430223274  | 0.127494781659  |
| F <sub>12,9,8,0</sub>  | 0.030540655203  | 0.030369527210  |
| F <sub>13,10,1,0</sub> | -0.024007127094 | -0.024183177870 |
| F <sub>13,10,2,0</sub> | -0.583203468909 | -0.587768453110 |
| F <sub>13,10,3,0</sub> | -0.307719775036 | -0.309138836101 |
| F <sub>13,10,4,0</sub> | -0.079580625533 | -0.077411026933 |
| F <sub>13,10,5,0</sub> | -0.024959250953 | -0.023671866358 |
| F <sub>13,10,6,0</sub> | -0.675420941229 | -0.678487141323 |
| F <sub>13,10,7,0</sub> | -0.098334666079 | -0.097081670148 |
| F <sub>13,10,8,0</sub> | 0.042997035871  | 0.042176833568  |
| F <sub>13,11,1,0</sub> | -0.010765067895 | -0.009102756902 |
| F <sub>13,11,2,0</sub> | -0.267254576613 | -0.266988939227 |
| F <sub>13,11,3,0</sub> | 0.025257546582  | 0.018364630177  |
| F <sub>13,11,4,0</sub> | 0.020254463387  | 0.019326459330  |
| F <sub>13,11,5,0</sub> | 0.007435963764  | 0.006693262348  |
| F <sub>13,11,6,0</sub> | -0.100182709777 | -0.098486385044 |
| F <sub>13,11,7,0</sub> | 0.014381428118  | 0.014226291073  |
| F <sub>13,11,8,0</sub> | -0.051952324352 | -0.052065998152 |
| F <sub>13,12,1,0</sub> | 0.026524218114  | 0.026902610997  |
| F <sub>13,12,2,0</sub> | -0.007392068617 | -0.008718383822 |
| F <sub>13,12,3,0</sub> | 0.001262851246  | 0.002428233207  |
| F <sub>13,12,4,0</sub> | -0.076177494163 | -0.075886909718 |
| F <sub>13,12,5,0</sub> | -0.063032977774 | -0.061680608772 |
| F <sub>13,12,6,0</sub> | 0.079370779241  | 0.076869304048  |
| F <sub>13,12,7,0</sub> | 0.038362437052  | 0.035346640757  |
| F <sub>13,12,8,0</sub> | -0.028796452737 | -0.029781849547 |
| F <sub>13,13,1,0</sub> | -0.034713058757 | -0.033786315778 |
| F <sub>13,13,2,0</sub> | -0.578693215350 | -0.582026498025 |
| F <sub>13,13,3,0</sub> | -0.113461762598 | -0.112025092621 |
| F <sub>13,13,4,0</sub> | 0.009966424932  | 0.010477932971  |
| F <sub>13,13,5,0</sub> | -0.000237358073 | -0.000082232476 |
| F <sub>13,13,6,0</sub> | -0.702617411213 | -0.701424054980 |
| F <sub>13,13,7,0</sub> | 0.104972942994  | 0.103496871761  |
| F <sub>13,13,8,0</sub> | 0.056329538857  | 0.055413356755  |
| F <sub>13,9,1,0</sub>  | -0.008512545190 | -0.008824711500 |
| F <sub>13,9,2,0</sub>  | 0.062922186371  | 0.063980063351  |
| F <sub>13,9,3,0</sub>  | -0.010889171219 | -0.012119776634 |
| F <sub>13,9,4,0</sub>  | -0.011467257517 | -0.012485428047 |
| F <sub>13,9,5,0</sub>  | -0.006678643194 | -0.007495079694 |
| F <sub>13,9,6,0</sub>  | 0.003202159231  | 0.002528230702  |
| F <sub>13,9,7,0</sub>  | -0.051245539423 | -0.052947840285 |
| F <sub>13,9,8,0</sub>  | -0.012072648664 | -0.012203284818 |
| F <sub>14,10,1,0</sub> | 0.186749179922  | 0.187631982360  |
| F <sub>14,10,2,0</sub> | 0.620959349334  | 0.622565186884  |
| F <sub>14,10,3,0</sub> | 0.084388511081  | 0.085358772352  |
| F <sub>14,10,4,0</sub> | -0.188830779386 | -0.190995753074 |
| F <sub>14,10,5,0</sub> | -0.312316148403 | -0.313139675972 |

|                        |                 |                 |
|------------------------|-----------------|-----------------|
| F <sub>14,10,6,0</sub> | -0.029371802778 | -0.029527247355 |
| F <sub>14,10,7,0</sub> | -0.495099155725 | -0.496783100530 |
| F <sub>14,10,8,0</sub> | -0.091907806298 | -0.091785785432 |
| F <sub>14,11,1,0</sub> | 0.004615211408  | 0.004274618859  |
| F <sub>14,11,2,0</sub> | 0.182313621383  | 0.183703448518  |
| F <sub>14,11,3,0</sub> | -0.085950046919 | -0.086357736861 |
| F <sub>14,11,4,0</sub> | -0.047785674665 | -0.046712767478 |
| F <sub>14,11,5,0</sub> | -0.064656880131 | -0.064386759815 |
| F <sub>14,11,6,0</sub> | -0.044996925417 | -0.044188244042 |
| F <sub>14,11,7,0</sub> | -0.041679938856 | -0.038734867967 |
| F <sub>14,11,8,0</sub> | 0.028759430991  | 0.029447657662  |
| F <sub>14,12,1,0</sub> | -0.065010214395 | -0.067050922657 |
| F <sub>14,12,2,0</sub> | -0.872991466464 | -0.872907004938 |
| F <sub>14,12,3,0</sub> | 0.029743586435  | 0.031416509205  |
| F <sub>14,12,4,0</sub> | 0.059437164180  | 0.059169424441  |
| F <sub>14,12,5,0</sub> | 0.389778096823  | 0.390450093692  |
| F <sub>14,12,6,0</sub> | 0.047860373286  | 0.046326379166  |
| F <sub>14,12,7,0</sub> | -0.723747478026 | -0.723000349165 |
| F <sub>14,12,8,0</sub> | 0.087870388905  | 0.086908487408  |
| F <sub>14,13,1,0</sub> | 0.022180797332  | 0.023003862542  |
| F <sub>14,13,2,0</sub> | 0.017829193059  | 0.017696867024  |
| F <sub>14,13,3,0</sub> | -0.051825127765 | -0.050983035409 |
| F <sub>14,13,4,0</sub> | 0.062690339725  | 0.061798168817  |
| F <sub>14,13,5,0</sub> | -0.036354277220 | -0.035845273772 |
| F <sub>14,13,6,0</sub> | 0.109458222213  | 0.108219315157  |
| F <sub>14,13,7,0</sub> | 0.028257275616  | 0.026638123810  |
| F <sub>14,13,8,0</sub> | -0.010968593902 | -0.011060410557 |
| F <sub>14,14,1,0</sub> | -0.130954846190 | -0.130326825667 |
| F <sub>14,14,2,0</sub> | -0.947732771363 | -0.948142856728 |
| F <sub>14,14,3,0</sub> | -0.057150566810 | -0.055173021973 |
| F <sub>14,14,4,0</sub> | -0.231771125473 | -0.232623030490 |
| F <sub>14,14,5,0</sub> | 0.175831089252  | 0.175477138540  |
| F <sub>14,14,6,0</sub> | -0.007335113643 | -0.008498874634 |
| F <sub>14,14,7,0</sub> | 0.404360761672  | 0.406306529831  |
| F <sub>14,14,8,0</sub> | 0.054870003338  | 0.054064073083  |
| F <sub>14,9,1,0</sub>  | 0.161237658842  | 0.159699597548  |
| F <sub>14,9,2,0</sub>  | -0.409798413458 | -0.410030340187 |
| F <sub>14,9,3,0</sub>  | 0.018546741172  | 0.019785605636  |
| F <sub>14,9,4,0</sub>  | 0.024999563988  | 0.022862837631  |
| F <sub>14,9,5,0</sub>  | 0.041278600599  | 0.039468825749  |
| F <sub>14,9,6,0</sub>  | -0.048291000728 | -0.049392324440 |
| F <sub>14,9,7,0</sub>  | 0.208931036154  | 0.211350696737  |
| F <sub>14,9,8,0</sub>  | 0.021090794984  | 0.020888357215  |
| F <sub>15,10,1,0</sub> | -0.072788714818 | -0.072578878038 |
| F <sub>15,10,2,0</sub> | 0.087918878103  | 0.088956495544  |
| F <sub>15,10,3,0</sub> | -0.063450855868 | -0.063042684462 |
| F <sub>15,10,4,0</sub> | 0.141955037460  | 0.140918544529  |
| F <sub>15,10,5,0</sub> | -0.148383838636 | -0.149267061403 |
| F <sub>15,10,6,0</sub> | 0.012333611401  | 0.011507127196  |
| F <sub>15,10,7,0</sub> | 0.182783297549  | 0.181024295695  |
| F <sub>15,10,8,0</sub> | -0.164700267243 | -0.164137774174 |
| F <sub>15,11,1,0</sub> | 0.019406102769  | 0.019676529978  |

|                        |                 |                 |
|------------------------|-----------------|-----------------|
| F <sub>15,11,2,0</sub> | -0.027004165045 | -0.027079498439 |
| F <sub>15,11,3,0</sub> | -0.026155522540 | -0.026077818177 |
| F <sub>15,11,4,0</sub> | -0.026339854414 | -0.026932069713 |
| F <sub>15,11,5,0</sub> | -0.096966070543 | -0.097195983860 |
| F <sub>15,11,6,0</sub> | -0.059513783214 | -0.058632380532 |
| F <sub>15,11,7,0</sub> | 0.074812324253  | 0.075930088008  |
| F <sub>15,11,8,0</sub> | 0.048631205512  | 0.049733316033  |
| F <sub>15,12,1,0</sub> | -0.013600629205 | -0.014062727860 |
| F <sub>15,12,2,0</sub> | -0.061099731090 | -0.062403923034 |
| F <sub>15,12,3,0</sub> | -0.016633959369 | -0.015174320980 |
| F <sub>15,12,4,0</sub> | 0.014415724857  | 0.015128910273  |
| F <sub>15,12,5,0</sub> | 0.001735717288  | 0.003057756309  |
| F <sub>15,12,6,0</sub> | -0.033367061355 | -0.033810399679 |
| F <sub>15,12,7,0</sub> | 0.115615190250  | 0.112645966096  |
| F <sub>15,12,8,0</sub> | 0.039651904769  | 0.037787294422  |
| F <sub>15,13,1,0</sub> | -0.003429597771 | -0.003406141704 |
| F <sub>15,13,2,0</sub> | 0.091574744217  | 0.092146706516  |
| F <sub>15,13,3,0</sub> | -0.071161303662 | -0.070225258988 |
| F <sub>15,13,4,0</sub> | 0.017850257773  | 0.017338368225  |
| F <sub>15,13,5,0</sub> | -0.111124347058 | -0.110513441014 |
| F <sub>15,13,6,0</sub> | 0.045873029634  | 0.045101760083  |
| F <sub>15,13,7,0</sub> | 0.164359228525  | 0.164847739206  |
| F <sub>15,13,8,0</sub> | -0.021753079955 | -0.021406759274 |
| F <sub>15,14,1,0</sub> | -0.010053829552 | -0.009772284693 |
| F <sub>15,14,2,0</sub> | -0.065522387823 | -0.066200351914 |
| F <sub>15,14,3,0</sub> | 0.023714372596  | 0.024255935776  |
| F <sub>15,14,4,0</sub> | -0.023574177958 | -0.022899206440 |
| F <sub>15,14,5,0</sub> | 0.004333283400  | 0.005041238262  |
| F <sub>15,14,6,0</sub> | -0.013203204194 | -0.012982878064 |
| F <sub>15,14,7,0</sub> | 0.125549003748  | 0.123843693868  |
| F <sub>15,14,8,0</sub> | 0.064793597482  | 0.063653308239  |
| F <sub>15,15,1,0</sub> | -0.018604345375 | -0.018091149842 |
| F <sub>15,15,2,0</sub> | -0.091927176798 | -0.091810826202 |
| F <sub>15,15,3,0</sub> | 0.047765893050  | 0.048280192489  |
| F <sub>15,15,4,0</sub> | 0.063479999614  | 0.064653972688  |
| F <sub>15,15,5,0</sub> | 0.027762263558  | 0.028124855305  |
| F <sub>15,15,6,0</sub> | -0.026409261629 | -0.025998864282 |
| F <sub>15,15,7,0</sub> | 0.150449015758  | 0.149276862065  |
| F <sub>15,15,8,0</sub> | 0.005646225627  | 0.004891147946  |
| F <sub>15,9,1,0</sub>  | 0.010041480784  | 0.011045654870  |
| F <sub>15,9,2,0</sub>  | -0.073215003835 | -0.074400385147 |
| F <sub>15,9,3,0</sub>  | 0.023768963272  | 0.024422380460  |
| F <sub>15,9,4,0</sub>  | -0.024873341852 | -0.024864001837 |
| F <sub>15,9,5,0</sub>  | -0.007270991306 | -0.007588347561 |
| F <sub>15,9,6,0</sub>  | -0.009836891388 | -0.009649866841 |
| F <sub>15,9,7,0</sub>  | 0.007675020877  | 0.007131438784  |
| F <sub>15,9,8,0</sub>  | 0.042851147114  | 0.043169786198  |
| F <sub>1,1,1,1</sub>   | 78.251522647195 | 78.209930676643 |
| F <sub>2,1,1,1</sub>   | -1.448471700993 | -1.452036828763 |
| F <sub>2,2,1,1</sub>   | -0.371699848451 | -0.370146625856 |
| F <sub>2,2,2,1</sub>   | 3.495737385266  | 3.457233615931  |
| F <sub>2,2,2,2</sub>   | 95.411664277044 | 94.800309897007 |

|                      |                  |                  |
|----------------------|------------------|------------------|
| F <sub>3,1,1,1</sub> | 0.007195486293   | -0.031911560835  |
| F <sub>3,2,1,1</sub> | -0.030731491912  | -0.001819181911  |
| F <sub>3,2,2,1</sub> | 0.091352882200   | 0.112368931592   |
| F <sub>3,2,2,2</sub> | 1.576897887817   | 1.547076924346   |
| F <sub>3,3,1,1</sub> | 0.047752299399   | 0.076235455235   |
| F <sub>3,3,2,1</sub> | -0.058810194682  | -0.046776299648  |
| F <sub>3,3,2,2</sub> | -0.661441853156  | -0.643785021880  |
| F <sub>3,3,3,1</sub> | -0.051977702911  | -0.043517679285  |
| F <sub>3,3,3,2</sub> | -0.410154846768  | -0.378818138454  |
| F <sub>3,3,3,3</sub> | 180.568440482292 | 180.181703253433 |
| F <sub>4,1,1,1</sub> | 0.041968365144   | -0.034915206953  |
| F <sub>4,2,1,1</sub> | 0.101361073516   | 0.126121111330   |
| F <sub>4,2,2,1</sub> | -0.478263717964  | -0.513750411575  |
| F <sub>4,2,2,2</sub> | 1.224839273829   | 1.247722619174   |
| F <sub>4,3,1,1</sub> | 0.039285551813   | 0.055163986945   |
| F <sub>4,3,2,1</sub> | -0.054497670684  | -0.039238322812  |
| F <sub>4,3,2,2</sub> | -0.366837697510  | -0.343507943662  |
| F <sub>4,3,3,1</sub> | -0.039164448437  | -0.059642817426  |
| F <sub>4,3,3,2</sub> | 0.050840153961   | 0.093409296481   |
| F <sub>4,3,3,3</sub> | 0.217412984810   | 0.198798990549   |
| F <sub>4,4,1,1</sub> | -0.178762491076  | -0.232133304556  |
| F <sub>4,4,2,1</sub> | 0.526726006695   | 0.494950363001   |
| F <sub>4,4,2,2</sub> | -0.172840383641  | -0.192237779343  |
| F <sub>4,4,3,1</sub> | -0.028026738320  | -0.003152917969  |
| F <sub>4,4,3,2</sub> | 0.281378313448   | 0.310290629187   |
| F <sub>4,4,3,3</sub> | -0.193704694227  | -0.167248123807  |
| F <sub>4,4,4,1</sub> | 0.216661584020   | 0.163772023822   |
| F <sub>4,4,4,2</sub> | -1.364108228280  | -1.326792447733  |
| F <sub>4,4,4,3</sub> | -0.029322390757  | -0.026347783911  |
| F <sub>4,4,4,4</sub> | 0.727491659803   | 0.730387333234   |
| F <sub>5,1,1,1</sub> | -0.094225249355  | -0.066385547932  |
| F <sub>5,2,1,1</sub> | -0.261180581453  | -0.289958554892  |
| F <sub>5,2,2,1</sub> | 0.736629574985   | 0.757184146119   |
| F <sub>5,2,2,2</sub> | -4.255976426495  | -4.251920929447  |
| F <sub>5,3,1,1</sub> | 0.076169899555   | 0.034073102579   |
| F <sub>5,3,2,1</sub> | 0.098967769916   | -0.008283645881  |
| F <sub>5,3,2,2</sub> | 0.221021405177   | 0.150123415146   |
| F <sub>5,3,3,1</sub> | -0.009294908780  | -0.029696160766  |
| F <sub>5,3,3,2</sub> | -0.003713758155  | 0.002492460493   |
| F <sub>5,3,3,3</sub> | 0.185057542309   | 0.145813782635   |
| F <sub>5,4,1,1</sub> | -0.272669113080  | -0.289626598550  |
| F <sub>5,4,2,1</sub> | 0.420286035590   | 0.469115949040   |
| F <sub>5,4,2,2</sub> | -1.430265700136  | -1.424816381751  |
| F <sub>5,4,3,1</sub> | -0.075424776033  | -0.020055142338  |
| F <sub>5,4,3,2</sub> | 0.314778545952   | 0.231506105121   |
| F <sub>5,4,3,3</sub> | -0.155931789606  | -0.155185798986  |
| F <sub>5,4,4,1</sub> | -0.108381581174  | -0.139193541928  |
| F <sub>5,4,4,2</sub> | -0.989454420311  | -0.998996370717  |
| F <sub>5,4,4,3</sub> | -0.219557582521  | -0.244743585931  |
| F <sub>5,4,4,4</sub> | 2.005473950324   | 1.969219334805   |
| F <sub>5,5,1,1</sub> | -0.417325952304  | -0.435776265365  |
| F <sub>5,5,2,1</sub> | 0.866685779146   | 0.882313201115   |

|                      |                 |                 |
|----------------------|-----------------|-----------------|
| F <sub>5,5,2,2</sub> | 2.889480833820  | 2.851518284711  |
| F <sub>5,5,3,1</sub> | 0.079092560292  | 0.066339866033  |
| F <sub>5,5,3,2</sub> | -0.125273393363 | -0.129442818054 |
| F <sub>5,5,3,3</sub> | -0.234589106490 | -0.248282093799 |
| F <sub>5,5,4,1</sub> | -0.213134210408 | -0.228697847774 |
| F <sub>5,5,4,2</sub> | 2.205909179636  | 2.185168618822  |
| F <sub>5,5,4,3</sub> | -0.362715696382 | -0.358780498611 |
| F <sub>5,5,4,4</sub> | 2.655308781765  | 2.623754561925  |
| F <sub>5,5,5,1</sub> | -0.342403882780 | -0.301214130685 |
| F <sub>5,5,5,2</sub> | 1.348518922533  | 1.381319120736  |
| F <sub>5,5,5,3</sub> | 0.064786821906  | 0.035284988973  |
| F <sub>5,5,5,4</sub> | -0.990229176134 | -1.037308169226 |
| F <sub>5,5,5,5</sub> | -0.127371642788 | -0.145234441267 |
| F <sub>6,1,1,1</sub> | -0.180550853704 | -0.174991041724 |
| F <sub>6,2,1,1</sub> | 0.018437890599  | 0.042130977123  |
| F <sub>6,2,2,1</sub> | -0.034635821931 | 0.007665206321  |
| F <sub>6,2,2,2</sub> | 0.161036388780  | 0.203091378380  |
| F <sub>6,3,1,1</sub> | 0.014016973112  | 0.013201859534  |
| F <sub>6,3,2,1</sub> | -0.055369630411 | -0.026158881923 |
| F <sub>6,3,2,2</sub> | 0.303138696999  | 0.313579806582  |
| F <sub>6,3,3,1</sub> | -0.050700941302 | -0.078209899348 |
| F <sub>6,3,3,2</sub> | -0.027062905808 | -0.039516445229 |
| F <sub>6,3,3,3</sub> | -0.770800484914 | -0.719350191673 |
| F <sub>6,4,1,1</sub> | 0.049876381728  | 0.058466281582  |
| F <sub>6,4,2,1</sub> | -0.061473356513 | -0.091120103766 |
| F <sub>6,4,2,2</sub> | 0.380271117244  | 0.385055953285  |
| F <sub>6,4,3,1</sub> | 0.002615889879  | -0.020055145035 |
| F <sub>6,4,3,2</sub> | -0.188779945550 | -0.127742540074 |
| F <sub>6,4,3,3</sub> | 0.046810893501  | 0.059258948886  |
| F <sub>6,4,4,1</sub> | -0.006310211548 | 0.011153020346  |
| F <sub>6,4,4,2</sub> | 0.119374168065  | 0.112099381917  |
| F <sub>6,4,4,3</sub> | -0.089350208194 | -0.044400531561 |
| F <sub>6,4,4,4</sub> | -0.184446997093 | -0.180024339981 |
| F <sub>6,5,1,1</sub> | -0.013796073414 | -0.022289675180 |
| F <sub>6,5,2,1</sub> | -0.030518695634 | 0.000871965407  |
| F <sub>6,5,2,2</sub> | 0.175869044930  | 0.116061745913  |
| F <sub>6,5,3,1</sub> | 0.109867304701  | 0.000435981062  |
| F <sub>6,5,3,2</sub> | -0.002179907065 | -0.006539720131 |
| F <sub>6,5,3,3</sub> | 0.021346634254  | 0.008519667382  |
| F <sub>6,5,4,1</sub> | 0.039674308314  | -0.010027563231 |
| F <sub>6,5,4,2</sub> | 0.068013083083  | 0.062781312293  |
| F <sub>6,5,4,3</sub> | -0.064089262779 | -0.029646732063 |
| F <sub>6,5,4,4</sub> | -0.240559237820 | -0.333078327121 |
| F <sub>6,5,5,1</sub> | -0.044359507987 | -0.003432554091 |
| F <sub>6,5,5,2</sub> | 0.279656775879  | 0.269052664527  |
| F <sub>6,5,5,3</sub> | -0.230502486373 | -0.212134461285 |
| F <sub>6,5,5,4</sub> | -0.291140290095 | -0.285615446013 |
| F <sub>6,5,5,5</sub> | -0.156054903390 | -0.148882142345 |
| F <sub>6,6,1,1</sub> | -0.089361421051 | -0.085509684405 |
| F <sub>6,6,2,1</sub> | 0.233482283323  | 0.211060440915  |
| F <sub>6,6,2,2</sub> | 0.627211135261  | 0.622168785029  |
| F <sub>6,6,3,1</sub> | -0.042612298790 | -0.038982660057 |

|                      |                 |                 |
|----------------------|-----------------|-----------------|
| F <sub>6,6,3,2</sub> | 0.117449330812  | 0.088230788020  |
| F <sub>6,6,3,3</sub> | -0.252875842817 | -0.239832789399 |
| F <sub>6,6,4,1</sub> | 0.093796659333  | 0.087956690139  |
| F <sub>6,6,4,2</sub> | -0.169053016041 | -0.137370176238 |
| F <sub>6,6,4,3</sub> | -0.086382770946 | -0.091220065311 |
| F <sub>6,6,4,4</sub> | 0.037523908102  | 0.037773292230  |
| F <sub>6,6,5,1</sub> | 0.085246990814  | 0.055597646626  |
| F <sub>6,6,5,2</sub> | -0.084409953929 | -0.106370760943 |
| F <sub>6,6,5,3</sub> | -0.076027231201 | -0.068395729069 |
| F <sub>6,6,5,4</sub> | 0.131551671969  | 0.092715850612  |
| F <sub>6,6,5,5</sub> | 0.185616981897  | 0.210754885169  |
| F <sub>6,6,6,1</sub> | 0.056322338239  | 0.053523339078  |
| F <sub>6,6,6,2</sub> | 0.869370747931  | 0.858025613011  |
| F <sub>6,6,6,3</sub> | 0.140009623358  | 0.186949795962  |
| F <sub>6,6,6,4</sub> | 0.069564803920  | 0.050654793311  |
| F <sub>6,6,6,5</sub> | 0.008776116213  | -0.017366111117 |
| F <sub>6,6,6,6</sub> | -0.133610498649 | -0.138645020316 |
| F <sub>7,1,1,1</sub> | 0.413358517944  | 0.415617690427  |
| F <sub>7,2,1,1</sub> | 0.203401987954  | 0.210175125743  |
| F <sub>7,2,2,1</sub> | -1.435102621521 | -1.398925778214 |
| F <sub>7,2,2,2</sub> | 8.741513004598  | 8.713499970139  |
| F <sub>7,3,1,1</sub> | -0.042684812414 | 0.024363768072  |
| F <sub>7,3,2,1</sub> | 0.059729446907  | 0.018311217328  |
| F <sub>7,3,2,2</sub> | -1.057438046005 | -1.009202722797 |
| F <sub>7,3,3,1</sub> | -0.048787556812 | -0.027354826549 |
| F <sub>7,3,3,2</sub> | 0.168681986201  | 0.188296789852  |
| F <sub>7,3,3,3</sub> | 0.032490096736  | 0.068496058858  |
| F <sub>7,4,1,1</sub> | -0.188952693026 | -0.162656881571 |
| F <sub>7,4,2,1</sub> | 0.481759410300  | 0.445572955884  |
| F <sub>7,4,2,2</sub> | -0.049808575221 | -0.058391278283 |
| F <sub>7,4,3,1</sub> | -0.031826638723 | -0.040110284146 |
| F <sub>7,4,3,2</sub> | 0.329601909619  | 0.308238824845  |
| F <sub>7,4,3,3</sub> | -0.039662156557 | -0.016272850993 |
| F <sub>7,4,4,1</sub> | 0.054843880005  | 0.074374159521  |
| F <sub>7,4,4,2</sub> | -1.591731466446 | -1.590190104758 |
| F <sub>7,4,4,3</sub> | 0.121244186257  | 0.160442802290  |
| F <sub>7,4,4,4</sub> | -0.948005047308 | -0.970580393744 |
| F <sub>7,5,1,1</sub> | 0.010650010128  | 0.011797272685  |
| F <sub>7,5,2,1</sub> | 0.011771494864  | 0.013951404106  |
| F <sub>7,5,2,2</sub> | -5.384791134103 | -5.319330014390 |
| F <sub>7,5,3,1</sub> | -0.036186454000 | -0.021363086331 |
| F <sub>7,5,3,2</sub> | 0.564159887093  | 0.497890719219  |
| F <sub>7,5,3,3</sub> | 0.058634368662  | 0.122351585817  |
| F <sub>7,5,4,1</sub> | 0.245021525658  | 0.205347218037  |
| F <sub>7,5,4,2</sub> | -2.723139604932 | -2.762813912198 |
| F <sub>7,5,4,3</sub> | 0.096351886724  | 0.054497669781  |
| F <sub>7,5,4,4</sub> | 1.246036242531  | 1.318103137145  |
| F <sub>7,5,5,1</sub> | -0.017238374722 | 0.022003544431  |
| F <sub>7,5,5,2</sub> | 1.976234336693  | 2.010540355713  |
| F <sub>7,5,5,3</sub> | -0.496158280109 | -0.402950815176 |
| F <sub>7,5,5,4</sub> | 3.352537152992  | 3.372332877387  |
| F <sub>7,5,5,5</sub> | 0.462773331396  | 0.454998390280  |

|          |                  |                  |
|----------|------------------|------------------|
| F7,6,1,1 | 0.047861749057   | 0.056412262852   |
| F7,6,2,1 | -0.203167316292  | -0.166108904930  |
| F7,6,2,2 | 0.545356099694   | 0.535780371026   |
| F7,6,3,1 | 0.027902804920   | 0.000435982539   |
| F7,6,3,2 | -0.156953291677  | -0.136026185692  |
| F7,6,3,3 | -0.074741390212  | -0.072321122034  |
| F7,6,4,1 | 0.004795788628   | -0.006103728951  |
| F7,6,4,2 | 0.018311246973   | 0.044034123178   |
| F7,6,4,3 | -0.026158869976  | -0.048829916105  |
| F7,6,4,4 | 0.072805161659   | 0.039871374218   |
| F7,6,5,1 | -0.051009802045  | -0.017875228768  |
| F7,6,5,2 | -0.240661727940  | -0.231506104028  |
| F7,6,5,3 | 0.125998599590   | 0.152593478818   |
| F7,6,5,4 | -0.051881843141  | 0.008283628925   |
| F7,6,5,5 | 0.211262265599   | 0.183877341519   |
| F7,6,6,1 | 0.056217886550   | 0.038438725588   |
| F7,6,6,2 | 0.046343001047   | 0.000058533406   |
| F7,6,6,3 | -0.152869195077  | -0.093536159340  |
| F7,6,6,4 | -0.010121076998  | -0.034504787456  |
| F7,6,6,5 | -0.233393834732  | -0.174379987024  |
| F7,6,6,6 | 0.475591265632   | 0.456095384269   |
| F7,7,1,1 | -0.372776795589  | -0.364925203734  |
| F7,7,2,1 | 0.471554557025   | 0.481844499846   |
| F7,7,2,2 | 10.180311353000  | 10.017956703344  |
| F7,7,3,1 | -0.020733959414  | -0.009441621348  |
| F7,7,3,2 | -0.415610569409  | -0.379194082455  |
| F7,7,3,3 | -0.378463136757  | -0.371261857995  |
| F7,7,4,1 | -0.004444456893  | 0.024488419225   |
| F7,7,4,2 | -1.886132664194  | -1.878547629546  |
| F7,7,4,3 | 0.137051059706   | 0.163393056362   |
| F7,7,4,4 | -2.903942701756  | -2.894491332744  |
| F7,7,5,1 | 0.415905828534   | 0.401634736288   |
| F7,7,5,2 | -7.077181133847  | -7.028063766693  |
| F7,7,5,3 | 0.823309842625   | 0.808904469724   |
| F7,7,5,4 | -2.154734612746  | -2.205672218934  |
| F7,7,5,5 | 3.244370432696   | 3.274783103659   |
| F7,7,6,1 | 0.008645232195   | -0.004647955130  |
| F7,7,6,2 | 0.545896198713   | 0.529056106671   |
| F7,7,6,3 | -0.430895337039  | -0.422251027566  |
| F7,7,6,4 | 0.092206343467   | 0.113954707819   |
| F7,7,6,5 | -0.163615111929  | -0.207621399550  |
| F7,7,6,6 | 0.340304518191   | 0.334078267725   |
| F7,7,7,1 | -0.339897007676  | -0.344914218473  |
| F7,7,7,2 | 11.851834148016  | 11.778479037421  |
| F7,7,7,3 | -1.102083753018  | -1.027651288152  |
| F7,7,7,4 | -3.351855940574  | -3.347430577770  |
| F7,7,7,5 | -12.659784638358 | -12.713683467722 |
| F7,7,7,6 | 0.806937095666   | 0.741377566984   |
| F7,7,7,7 | 22.130399487819  | 22.224041207453  |
| F8,1,1,1 | -0.013100720760  | 0.013093297533   |
| F8,2,1,1 | 0.010799930312   | 0.030447513837   |
| F8,2,2,1 | 0.080598203837   | 0.059437757803   |



|                      |                 |                 |
|----------------------|-----------------|-----------------|
| F <sub>8,2,2,2</sub> | -0.747640907853 | -0.744045615182 |
| F <sub>8,3,1,1</sub> | -0.010185303607 | -0.037650263044 |
| F <sub>8,3,2,1</sub> | -0.018311217133 | -0.006539720485 |
| F <sub>8,3,2,2</sub> | 0.193801121292  | 0.161897086895  |
| F <sub>8,3,3,1</sub> | 0.047727889869  | 0.026514561320  |
| F <sub>8,3,3,2</sub> | -0.004842630347 | -0.012305083014 |
| F <sub>8,3,3,3</sub> | -0.083271481972 | -0.112480149685 |
| F <sub>8,4,1,1</sub> | 0.026530622136  | 0.055141810547  |
| F <sub>8,4,2,1</sub> | -0.029646728894 | -0.038366360061 |
| F <sub>8,4,2,2</sub> | -0.157268454710 | -0.151751164373 |
| F <sub>8,4,3,1</sub> | -0.059293464584 | -0.003487850855 |
| F <sub>8,4,3,2</sub> | -0.004359818875 | 0.003051869558  |
| F <sub>8,4,3,3</sub> | 0.040799096705  | 0.040450552057  |
| F <sub>8,4,4,1</sub> | -0.137181078863 | -0.110568551087 |
| F <sub>8,4,4,2</sub> | 0.407516567929  | 0.425631592385  |
| F <sub>8,4,4,3</sub> | -0.101239330467 | -0.083309402872 |
| F <sub>8,4,4,4</sub> | -0.028020994657 | -0.056440706974 |
| F <sub>8,5,1,1</sub> | 0.100570068123  | 0.043954702719  |
| F <sub>8,5,2,1</sub> | -0.104635527174 | -0.048393931543 |
| F <sub>8,5,2,2</sub> | -0.024358407371 | 0.016844588821  |
| F <sub>8,5,3,1</sub> | -0.003487850661 | -0.050137856997 |
| F <sub>8,5,3,2</sub> | 0.115099079587  | 0.190523856630  |
| F <sub>8,5,3,3</sub> | 0.145225126211  | 0.133529055342  |
| F <sub>8,5,4,1</sub> | -0.123818707341 | -0.037058415812 |
| F <sub>8,5,4,2</sub> | 0.252433207819  | 0.224966384626  |
| F <sub>8,5,4,3</sub> | -0.010899533937 | 0.062345335271  |
| F <sub>8,5,4,4</sub> | -0.290333468314 | -0.299281535765 |
| F <sub>8,5,5,1</sub> | -0.084070626532 | -0.026965822357 |
| F <sub>8,5,5,2</sub> | 0.351023951539  | 0.311272359277  |
| F <sub>8,5,5,3</sub> | 0.024640365448  | 0.033110833998  |
| F <sub>8,5,5,4</sub> | -0.451199230933 | -0.435958169084 |
| F <sub>8,5,5,5</sub> | -0.778207483365 | -0.805107408985 |
| F <sub>8,6,1,1</sub> | 0.013520615238  | 0.010255947831  |
| F <sub>8,6,2,1</sub> | -0.047086012907 | -0.013079441013 |
| F <sub>8,6,2,2</sub> | -0.248966939363 | -0.252125562245 |
| F <sub>8,6,3,1</sub> | -0.014387385995 | 0.024850938055  |
| F <sub>8,6,3,2</sub> | 0.187472008862  | 0.166980862820  |
| F <sub>8,6,3,3</sub> | -0.027963618852 | -0.053635122962 |
| F <sub>8,6,4,1</sub> | 0.022235028240  | 0.006975701885  |
| F <sub>8,6,4,2</sub> | -0.040546138410 | -0.092864029300 |
| F <sub>8,6,4,3</sub> | -0.016567257188 | -0.028774771095 |
| F <sub>8,6,4,4</sub> | 0.146851665512  | 0.137985269842  |
| F <sub>8,6,5,1</sub> | 0.007847663935  | 0.032698602445  |
| F <sub>8,6,5,2</sub> | -0.085016364727 | -0.139514037060 |
| F <sub>8,6,5,3</sub> | 0.152593482626  | 0.068013092862  |
| F <sub>8,6,5,4</sub> | 0.242405659326  | 0.206655166736  |
| F <sub>8,6,5,5</sub> | 0.131050540061  | 0.121972869723  |
| F <sub>8,6,6,1</sub> | -0.044753008729 | -0.059519097075 |
| F <sub>8,6,6,2</sub> | -0.067359711783 | -0.074610783124 |
| F <sub>8,6,6,3</sub> | 0.156967315040  | 0.134998357624  |
| F <sub>8,6,6,4</sub> | 0.046295060214  | 0.025812151237  |
| F <sub>8,6,6,5</sub> | 0.012316869190  | -0.066599602349 |

|                      |                 |                 |
|----------------------|-----------------|-----------------|
| F <sub>8,6,6,6</sub> | 0.042867244094  | 0.056832218950  |
| F <sub>8,7,1,1</sub> | -0.011079895311 | -0.012865060387 |
| F <sub>8,7,2,1</sub> | 0.027902809311  | 0.016131310382  |
| F <sub>8,7,2,2</sub> | 0.050908711625  | 0.047749561005  |
| F <sub>8,7,3,1</sub> | -0.048829914182 | 0.014387385077  |
| F <sub>8,7,3,2</sub> | -0.245457508259 | -0.234557974538 |
| F <sub>8,7,3,3</sub> | -0.069316430102 | -0.093931169694 |
| F <sub>8,7,4,1</sub> | -0.087632251320 | -0.046214023722 |
| F <sub>8,7,4,2</sub> | 0.106815438078  | 0.146053757440  |
| F <sub>8,7,4,3</sub> | -0.096351878350 | -0.074116831791 |
| F <sub>8,7,4,4</sub> | 0.346160563289  | 0.303261064387  |
| F <sub>8,7,5,1</sub> | -0.013515414680 | 0.052753745743  |
| F <sub>8,7,5,2</sub> | -0.282079948692 | -0.279464055130 |
| F <sub>8,7,5,3</sub> | 0.003923826748  | 0.071936925281  |
| F <sub>8,7,5,4</sub> | 0.470423860515  | 0.490043053049  |
| F <sub>8,7,5,5</sub> | 0.699807521336  | 0.700770376666  |
| F <sub>8,7,6,1</sub> | -0.057549538818 | -0.011335516787 |
| F <sub>8,7,6,2</sub> | 0.019619173598  | 0.033134583257  |
| F <sub>8,7,6,3</sub> | -0.001307959469 | -0.027466825651 |
| F <sub>8,7,6,4</sub> | -0.112919172710 | -0.030954672978 |
| F <sub>8,7,6,5</sub> | -0.190087811964 | -0.133846275398 |
| F <sub>8,7,6,6</sub> | -0.009811570418 | -0.018043992099 |
| F <sub>8,7,7,1</sub> | -0.004325665664 | -0.034575680146 |
| F <sub>8,7,7,2</sub> | 0.216160433248  | 0.206636831563  |
| F <sub>8,7,7,3</sub> | -0.139922764421 | -0.164164128171 |
| F <sub>8,7,7,4</sub> | -0.010144606877 | -0.064819120491 |
| F <sub>8,7,7,5</sub> | -0.337049524591 | -0.365814934373 |
| F <sub>8,7,7,6</sub> | 0.105208564620  | 0.075679583423  |
| F <sub>8,7,7,7</sub> | 0.580627175446  | 0.594351247248  |
| F <sub>8,8,1,1</sub> | -0.044657957479 | -0.054371713266 |
| F <sub>8,8,2,1</sub> | 0.101736656297  | 0.063883697385  |
| F <sub>8,8,2,2</sub> | 0.175919376260  | 0.188769326719  |
| F <sub>8,8,3,1</sub> | 0.025929256572  | 0.025965352595  |
| F <sub>8,8,3,2</sub> | -0.136529634277 | -0.107247402949 |
| F <sub>8,8,3,3</sub> | -0.054667350090 | -0.023304384461 |
| F <sub>8,8,4,1</sub> | 0.082487578732  | 0.084363170971  |
| F <sub>8,8,4,2</sub> | -0.289225380147 | -0.290254304211 |
| F <sub>8,8,4,3</sub> | 0.154701707588  | 0.109754136072  |
| F <sub>8,8,4,4</sub> | -0.004125672701 | 0.006248740284  |
| F <sub>8,8,5,1</sub> | 0.020193287486  | 0.052532566580  |
| F <sub>8,8,5,2</sub> | -0.229737077660 | -0.222156846705 |
| F <sub>8,8,5,3</sub> | 0.025701753580  | -0.011955960675 |
| F <sub>8,8,5,4</sub> | 0.300078283381  | 0.305474758212  |
| F <sub>8,8,5,5</sub> | 0.520837470367  | 0.514649947040  |
| F <sub>8,8,6,1</sub> | 0.024393454963  | -0.018440797600 |
| F <sub>8,8,6,2</sub> | 0.101512135366  | 0.121241771679  |
| F <sub>8,8,6,3</sub> | -0.020121670171 | 0.018592184857  |
| F <sub>8,8,6,4</sub> | -0.147874246056 | -0.148003958835 |
| F <sub>8,8,6,5</sub> | -0.055491750019 | -0.093737776592 |
| F <sub>8,8,6,6</sub> | -0.038719395746 | -0.025225714090 |
| F <sub>8,8,7,1</sub> | 0.019912524863  | 0.007840760982  |
| F <sub>8,8,7,2</sub> | -0.056390058851 | -0.055694236682 |

|                          |                 |                 |
|--------------------------|-----------------|-----------------|
| F <sub>8,8,7,3</sub>     | 0.110040780143  | 0.108706345830  |
| F <sub>8,8,7,4</sub>     | -0.345536057450 | -0.342281211335 |
| F <sub>8,8,7,5</sub>     | -0.447051159290 | -0.440249352309 |
| F <sub>8,8,7,6</sub>     | 0.195566957703  | 0.137848308023  |
| F <sub>8,8,7,7</sub>     | 0.151238992093  | 0.159516083938  |
| F <sub>8,8,8,1</sub>     | -0.078828665706 | -0.039404872250 |
| F <sub>8,8,8,2</sub>     | 0.237436390495  | 0.242715518954  |
| F <sub>8,8,8,3</sub>     | -0.114602034753 | -0.114344346613 |
| F <sub>8,8,8,4</sub>     | 0.067113161584  | 0.044045480966  |
| F <sub>8,8,8,5</sub>     | -0.251782543187 | -0.283974373079 |
| F <sub>8,8,8,6</sub>     | 0.192484099289  | 0.202660473144  |
| F <sub>8,8,8,7</sub>     | 0.378331825825  | 0.361086182747  |
| F <sub>8,8,8,8</sub>     | -0.062884011299 | -0.060484604986 |
| F <sub>9,9,1,1</sub>     | 79.986849218335 | 80.092079392723 |
| F <sub>9,9,2,1</sub>     | -1.278796381837 | -1.235387603241 |
| F <sub>9,9,2,2</sub>     | -0.443688630136 | -0.473578494365 |
| F <sub>9,9,3,1</sub>     | -0.002990243773 | -0.006140155655 |
| F <sub>9,9,3,2</sub>     | 0.034202273087  | 0.011434360333  |
| F <sub>9,9,3,3</sub>     | 0.062581119757  | 0.091258992178  |
| F <sub>9,9,4,1</sub>     | -0.203358879324 | -0.244873226004 |
| F <sub>9,9,4,2</sub>     | 0.030573043958  | 0.064670177074  |
| F <sub>9,9,4,3</sub>     | 0.134031224784  | 0.084771272861  |
| F <sub>9,9,4,4</sub>     | -1.202619820335 | -1.214749230730 |
| F <sub>9,9,5,1</sub>     | -0.010693604176 | 0.041582550096  |
| F <sub>9,9,5,2</sub>     | -0.134086305670 | -0.154210799968 |
| F <sub>9,9,5,3</sub>     | 0.074062308401  | 0.050732340312  |
| F <sub>9,9,5,4</sub>     | -0.141755693219 | -0.125822933147 |
| F <sub>9,9,5,5</sub>     | -0.574989656716 | -0.562820652097 |
| F <sub>9,9,6,1</sub>     | -0.140442908641 | -0.171939401402 |
| F <sub>9,9,6,2</sub>     | 0.061511045615  | 0.074523948516  |
| F <sub>9,9,6,3</sub>     | 0.021778850797  | 0.062684345694  |
| F <sub>9,9,6,4</sub>     | 0.133369815382  | 0.103895406576  |
| F <sub>9,9,6,5</sub>     | 0.069245269075  | 0.010317622942  |
| F <sub>9,9,6,6</sub>     | -0.127278363383 | -0.134398002616 |
| F <sub>9,9,7,1</sub>     | 0.252989380190  | 0.271102240543  |
| F <sub>9,9,7,2</sub>     | 0.125657700666  | 0.092005258656  |
| F <sub>9,9,7,3</sub>     | -0.012162130357 | 0.037502401119  |
| F <sub>9,9,7,4</sub>     | -0.444945173461 | -0.403574409542 |
| F <sub>9,9,7,5</sub>     | -0.178268598817 | -0.155510815777 |
| F <sub>9,9,7,6</sub>     | 0.076614847787  | 0.065947417877  |
| F <sub>9,9,7,7</sub>     | -0.248226773484 | -0.260647528552 |
| F <sub>9,9,8,1</sub>     | 0.018977048352  | 0.029475693596  |
| F <sub>9,9,8,2</sub>     | -0.043699999457 | -0.060538526199 |
| F <sub>9,9,8,3</sub>     | -0.024894890509 | -0.066998755927 |
| F <sub>9,9,8,4</sub>     | -0.049996667434 | -0.009657179596 |
| F <sub>9,9,8,5</sub>     | 0.117641026419  | 0.047913671296  |
| F <sub>9,9,8,6</sub>     | -0.040305529124 | 0.025970539434  |
| F <sub>9,9,8,7</sub>     | 0.075590989708  | -0.016470926684 |
| F <sub>9,9,8,8</sub>     | -0.096009946285 | -0.093084718017 |
| F <sub>9,9,9,9</sub>     | 81.851870993514 | 82.046326900805 |
| F <sub>10,10,10,10</sub> | 75.849828002664 | 75.405159455393 |
| F <sub>10,10,10,9</sub>  | 0.058409441131  | 0.045844372649  |

|                        |                 |                 |
|------------------------|-----------------|-----------------|
| F <sub>10,10,1,1</sub> | -0.531136086540 | -0.557087368918 |
| F <sub>10,10,2,1</sub> | 3.427723067270  | 3.383935573030  |
| F <sub>10,10,2,2</sub> | 86.691715093391 | 86.202175167349 |
| F <sub>10,10,3,1</sub> | -0.085893777318 | -0.087568059847 |
| F <sub>10,10,3,2</sub> | 2.100217352419  | 2.121919538643  |
| F <sub>10,10,3,3</sub> | -0.584746766776 | -0.587101847937 |
| F <sub>10,10,4,1</sub> | -0.210669952093 | -0.213147196054 |
| F <sub>10,10,4,2</sub> | -0.200430003555 | -0.202552862418 |
| F <sub>10,10,4,3</sub> | -0.204089092719 | -0.252544154874 |
| F <sub>10,10,4,4</sub> | 0.846975176494  | 0.808318350832  |
| F <sub>10,10,5,1</sub> | 0.296103128941  | 0.361123353936  |
| F <sub>10,10,5,2</sub> | 1.046953675787  | 0.992487264844  |
| F <sub>10,10,5,3</sub> | -0.373522868664 | -0.415834794622 |
| F <sub>10,10,5,4</sub> | 1.071278613314  | 1.026173981931  |
| F <sub>10,10,5,5</sub> | 0.042884193821  | -0.042739243315 |
| F <sub>10,10,6,1</sub> | 0.093377249923  | 0.103600814730  |
| F <sub>10,10,6,2</sub> | 0.580328869006  | 0.562688928574  |
| F <sub>10,10,6,3</sub> | 0.302282553731  | 0.336413568303  |
| F <sub>10,10,6,4</sub> | 0.218822156237  | 0.243744831410  |
| F <sub>10,10,6,5</sub> | 0.191387125628  | 0.175185654104  |
| F <sub>10,10,6,6</sub> | -0.105817765641 | -0.107241557566 |
| F <sub>10,10,7,1</sub> | -0.309829025516 | -0.321295824482 |
| F <sub>10,10,7,2</sub> | -1.169810620982 | -1.130016971391 |
| F <sub>10,10,7,3</sub> | -0.072059262474 | -0.037285171679 |
| F <sub>10,10,7,4</sub> | -0.425359549767 | -0.448044507556 |
| F <sub>10,10,7,5</sub> | 1.245042873547  | 1.261696917668  |
| F <sub>10,10,7,6</sub> | 0.456455228743  | 0.447464643385  |
| F <sub>10,10,7,7</sub> | -1.574029580488 | -1.666303938363 |
| F <sub>10,10,8,1</sub> | 0.200345295112  | 0.212319570759  |
| F <sub>10,10,8,2</sub> | 0.077301599684  | 0.053084924963  |
| F <sub>10,10,8,3</sub> | 0.169150355199  | 0.215047650399  |
| F <sub>10,10,8,4</sub> | -0.413538054789 | -0.406131925558 |
| F <sub>10,10,8,5</sub> | 0.082158851315  | 0.060188223585  |
| F <sub>10,10,8,6</sub> | -0.160502241839 | -0.151306192226 |
| F <sub>10,10,8,7</sub> | 0.124622121325  | 0.153628879729  |
| F <sub>10,10,8,8</sub> | 0.544410036863  | 0.538182340580  |
| F <sub>10,10,9,9</sub> | -0.759851413342 | -0.807649629376 |
| F <sub>10,9,1,1</sub>  | 0.040100527786  | -0.017113858172 |
| F <sub>10,9,2,1</sub>  | -0.165236937446 | -0.135590204607 |
| F <sub>10,9,2,2</sub>  | 0.712955079017  | 0.692423263098  |
| F <sub>10,9,3,1</sub>  | 0.165236937442  | 0.077604683036  |
| F <sub>10,9,3,2</sub>  | -0.024850937830 | -0.013515422309 |
| F <sub>10,9,3,3</sub>  | -0.062550532976 | -0.074062044751 |
| F <sub>10,9,4,1</sub>  | 0.078040664376  | 0.030518695569  |
| F <sub>10,9,4,2</sub>  | 0.134282260504  | 0.179624322500  |
| F <sub>10,9,4,3</sub>  | -0.056241596122 | 0.054933652029  |
| F <sub>10,9,4,4</sub>  | -0.375795627012 | -0.378828052981 |
| F <sub>10,9,5,1</sub>  | -0.155209366039 | -0.112047210885 |
| F <sub>10,9,5,2</sub>  | 0.592062694083  | 0.609937930054  |
| F <sub>10,9,5,3</sub>  | 0.144309831913  | 0.105943471769  |
| F <sub>10,9,5,4</sub>  | -0.335269669909 | -0.415054259765 |
| F <sub>10,9,5,5</sub>  | 0.221107963560  | 0.232387753509  |

|                          |                 |                 |
|--------------------------|-----------------|-----------------|
| F <sub>10,9,6,1</sub>    | -0.165236937446 | -0.099403751282 |
| F <sub>10,9,6,2</sub>    | 0.087196273054  | 0.038802341505  |
| F <sub>10,9,6,3</sub>    | 0.039238322915  | 0.024850937825  |
| F <sub>10,9,6,4</sub>    | 0.033134583756  | -0.010463552716 |
| F <sub>10,9,6,5</sub>    | -0.028338788759 | -0.011771496865 |
| F <sub>10,9,6,6</sub>    | -0.112162205590 | -0.064801199263 |
| F <sub>10,9,7,1</sub>    | -0.029646732844 | -0.085016366241 |
| F <sub>10,9,7,2</sub>    | 0.346605185405  | 0.465192116775  |
| F <sub>10,9,7,3</sub>    | 0.090248142619  | 0.013515422323  |
| F <sub>10,9,7,4</sub>    | -0.010463552774 | -0.115535061792 |
| F <sub>10,9,7,5</sub>    | -0.304750974346 | -0.252869191874 |
| F <sub>10,9,7,6</sub>    | 0.043162155128  | 0.055369633384  |
| F <sub>10,9,7,7</sub>    | -0.376216574553 | -0.366019221156 |
| F <sub>10,9,8,1</sub>    | -0.034442527831 | -0.027466826015 |
| F <sub>10,9,8,2</sub>    | 0.202731334839  | 0.223658440393  |
| F <sub>10,9,8,3</sub>    | -0.039238322864 | -0.032262621029 |
| F <sub>10,9,8,4</sub>    | 0.062345335188  | 0.116407024538  |
| F <sub>10,9,8,5</sub>    | 0.121638800912  | 0.073244869372  |
| F <sub>10,9,8,6</sub>    | 0.035750472027  | 0.045778043349  |
| F <sub>10,9,8,7</sub>    | 0.081528515339  | -0.006103739121 |
| F <sub>10,9,8,8</sub>    | -0.113124371319 | -0.122891957698 |
| F <sub>10,9,9,9</sub>    | -0.041933346936 | -0.013583241139 |
| F <sub>11,10,10,10</sub> | 2.799167939537  | 2.779464844566  |
| F <sub>11,10,10,9</sub>  | 0.007012109371  | 0.060558516106  |
| F <sub>11,10,1,1</sub>   | 0.035037920589  | 0.033540945842  |
| F <sub>11,10,2,1</sub>   | -0.080656552600 | -0.084144403500 |
| F <sub>11,10,2,2</sub>   | 1.478527119580  | 1.482923410190  |
| F <sub>11,10,3,1</sub>   | -0.021363086894 | -0.037930378773 |
| F <sub>11,10,3,2</sub>   | -0.544104743882 | -0.609065967326 |
| F <sub>11,10,3,3</sub>   | -0.386210281308 | -0.358301064654 |
| F <sub>11,10,4,1</sub>   | 0.065397204792  | -0.021363086910 |
| F <sub>11,10,4,2</sub>   | -0.120330856814 | -0.177880397049 |
| F <sub>11,10,4,3</sub>   | -0.008283645951 | 0.006539720466  |
| F <sub>11,10,4,4</sub>   | 0.148513346288  | 0.120316271367  |
| F <sub>11,10,5,1</sub>   | 0.056241596123  | 0.018747198712  |
| F <sub>11,10,5,2</sub>   | -0.098531788566 | -0.119022912739 |
| F <sub>11,10,5,3</sub>   | -0.047085987444 | -0.053189726589 |
| F <sub>11,10,5,4</sub>   | 0.133410297783  | 0.163493011994  |
| F <sub>11,10,5,5</sub>   | 0.015914875851  | -0.031284973021 |
| F <sub>11,10,6,1</sub>   | -0.050137857007 | -0.053625707909 |
| F <sub>11,10,6,2</sub>   | 0.480015483162  | 0.468243986345  |
| F <sub>11,10,6,3</sub>   | 0.041418229699  | 0.017875235976  |
| F <sub>11,10,6,4</sub>   | -0.132538335067 | -0.122510763628 |
| F <sub>11,10,6,5</sub>   | -0.216246757177 | -0.199243483948 |
| F <sub>11,10,6,6</sub>   | 0.289350361115  | 0.308299408990  |
| F <sub>11,10,7,1</sub>   | 0.013515422314  | -0.024850937813 |
| F <sub>11,10,7,2</sub>   | -0.476527632286 | -0.421593980244 |
| F <sub>11,10,7,3</sub>   | 0.020927105555  | 0.149541608305  |
| F <sub>11,10,7,4</sub>   | 0.081528515306  | 0.119894875476  |
| F <sub>11,10,7,5</sub>   | 0.183548154790  | 0.194447688922  |
| F <sub>11,10,7,6</sub>   | 0.116843005890  | 0.115535061814  |
| F <sub>11,10,7,7</sub>   | -0.115661293402 | -0.126960331969 |

|                          |                  |                  |
|--------------------------|------------------|------------------|
| F <sub>11,10,8,1</sub>   | 0.040546266983   | -0.022235049627  |
| F <sub>11,10,8,2</sub>   | 0.210143018031   | 0.142129925082   |
| F <sub>11,10,8,3</sub>   | 0.150849552403   | 0.057985521578   |
| F <sub>11,10,8,4</sub>   | -0.034878509270  | 0.054061689293   |
| F <sub>11,10,8,5</sub>   | 0.171340676554   | 0.105507490399   |
| F <sub>11,10,8,6</sub>   | 0.232378067821   | 0.244149564573   |
| F <sub>11,10,8,7</sub>   | -0.092428049444  | -0.022235049626  |
| F <sub>11,10,8,8</sub>   | -0.132860006541  | -0.135559688527  |
| F <sub>11,10,9,9</sub>   | 0.056241500074   | 0.078636330727   |
| F <sub>11,11,10,10</sub> | -0.557738162724  | -0.565424606474  |
| F <sub>11,11,10,9</sub>  | -0.031575504419  | -0.068798504902  |
| F <sub>11,11,1,1</sub>   | 0.053409647584   | 0.070310286327   |
| F <sub>11,11,11,10</sub> | -0.385172878561  | -0.396894160841  |
| F <sub>11,11,11,11</sub> | 180.675552462919 | 180.258368379220 |
| F <sub>11,11,11,9</sub>  | 0.009767746866   | 0.023258741847   |
| F <sub>11,11,2,1</sub>   | -0.052347266098  | -0.028591184031  |
| F <sub>11,11,2,2</sub>   | -0.694157848721  | -0.693586790372  |
| F <sub>11,11,3,1</sub>   | -0.014191612345  | -0.047994365524  |
| F <sub>11,11,3,2</sub>   | -0.355632138384  | -0.360290059141  |
| F <sub>11,11,3,3</sub>   | 180.604975480726 | 180.180542699728 |
| F <sub>11,11,4,1</sub>   | -0.050698326040  | -0.062163499345  |
| F <sub>11,11,4,2</sub>   | 0.047878155873   | 0.080231358330   |
| F <sub>11,11,4,3</sub>   | 0.187220954335   | 0.200205721027   |
| F <sub>11,11,4,4</sub>   | -0.189978197735  | -0.152569879755  |
| F <sub>11,11,5,1</sub>   | -0.015791232554  | -0.021534136456  |
| F <sub>11,11,5,2</sub>   | 0.073910344012   | 0.071828769402   |
| F <sub>11,11,5,3</sub>   | 0.113434779842   | 0.121294247386   |
| F <sub>11,11,5,4</sub>   | -0.158926651432  | -0.153323296193  |
| F <sub>11,11,5,5</sub>   | -0.269299310026  | -0.281697875744  |
| F <sub>11,11,6,1</sub>   | -0.136485534018  | -0.087090698839  |
| F <sub>11,11,6,2</sub>   | -0.008648458076  | -0.071429197692  |
| F <sub>11,11,6,3</sub>   | -0.789548950820  | -0.724362620727  |
| F <sub>11,11,6,4</sub>   | 0.118613471383   | 0.050705604653   |
| F <sub>11,11,6,5</sub>   | 0.056098746184   | -0.016109557721  |
| F <sub>11,11,6,6</sub>   | -0.245218523568  | -0.240213803915  |
| F <sub>11,11,7,1</sub>   | -0.068630719547  | -0.014968606921  |
| F <sub>11,11,7,2</sub>   | 0.114590478916   | 0.136072913499   |
| F <sub>11,11,7,3</sub>   | 0.025131043491   | 0.080966389981   |
| F <sub>11,11,7,4</sub>   | 0.001432666725   | 0.013894512333   |
| F <sub>11,11,7,5</sub>   | 0.136778242612   | 0.149743213670   |
| F <sub>11,11,7,6</sub>   | -0.060149144721  | -0.054383419212  |
| F <sub>11,11,7,7</sub>   | -0.369839803474  | -0.360616377813  |
| F <sub>11,11,8,1</sub>   | 0.009385457964   | 0.034841618553   |
| F <sub>11,11,8,2</sub>   | -0.037327983101  | 0.003651345582   |
| F <sub>11,11,8,3</sub>   | -0.114304616940  | -0.104023634708  |
| F <sub>11,11,8,4</sub>   | -0.023837808049  | 0.036288547341   |
| F <sub>11,11,8,5</sub>   | 0.150306090256   | 0.139335609884   |
| F <sub>11,11,8,6</sub>   | -0.033463943523  | -0.032719252668  |
| F <sub>11,11,8,7</sub>   | -0.085185515677  | -0.087703573955  |
| F <sub>11,11,8,8</sub>   | -0.009258590123  | -0.008512032585  |
| F <sub>11,11,9,9</sub>   | 0.096537433129   | 0.094949165474   |
| F <sub>11,9,1,1</sub>    | -0.070125513628  | -0.055193627034  |

|                          |                 |                 |
|--------------------------|-----------------|-----------------|
| F <sub>11,9,2,1</sub>    | 0.142565906457  | 0.121638800920  |
| F <sub>11,9,2,2</sub>    | -0.118173666861 | -0.112322219721 |
| F <sub>11,9,3,1</sub>    | -0.030082714205 | 0.059729447049  |
| F <sub>11,9,3,2</sub>    | -0.084144403507 | -0.078040664394 |
| F <sub>11,9,3,3</sub>    | 0.029999862020  | 0.042045251301  |
| F <sub>11,9,4,1</sub>    | -0.151721515139 | -0.029646732850 |
| F <sub>11,9,4,2</sub>    | 0.021363086895  | -0.000435981371 |
| F <sub>11,9,4,3</sub>    | -0.119458894077 | 0.006539720480  |
| F <sub>11,9,4,4</sub>    | -0.018048291229 | -0.028313120799 |
| F <sub>11,9,5,1</sub>    | 0.001743925460  | -0.012643459585 |
| F <sub>11,9,5,2</sub>    | 0.130794409604  | 0.128614502769  |
| F <sub>11,9,5,3</sub>    | -0.029210751474 | 0.010899534123  |
| F <sub>11,9,5,4</sub>    | 0.053189726567  | 0.052753745189  |
| F <sub>11,9,5,5</sub>    | 0.031082298452  | 0.067542644225  |
| F <sub>11,9,6,1</sub>    | -0.088504217132 | 0.025286919205  |
| F <sub>11,9,6,2</sub>    | -0.002615888209 | 0.004795794999  |
| F <sub>11,9,6,3</sub>    | -0.065833186142 | -0.014823366393 |
| F <sub>11,9,6,4</sub>    | -0.037494397425 | -0.005667757705 |
| F <sub>11,9,6,5</sub>    | 0.114227117705  | 0.036186453319  |
| F <sub>11,9,6,6</sub>    | -0.101756713394 | -0.035409093392 |
| F <sub>11,9,7,1</sub>    | 0.022235049624  | -0.038366360151 |
| F <sub>11,9,7,2</sub>    | 0.066269167527  | 0.010463552758  |
| F <sub>11,9,7,3</sub>    | -0.042290192446 | 0.046650006074  |
| F <sub>11,9,7,4</sub>    | 0.098967769920  | 0.050137857015  |
| F <sub>11,9,7,5</sub>    | 0.043598136527  | 0.040982248335  |
| F <sub>11,9,7,6</sub>    | 0.044906080601  | 0.006539720490  |
| F <sub>11,9,7,7</sub>    | 0.034028931164  | 0.001574153479  |
| F <sub>11,9,8,1</sub>    | 0.052753745216  | -0.005667757749 |
| F <sub>11,9,8,2</sub>    | -0.027030844684 | -0.043162155166 |
| F <sub>11,9,8,3</sub>    | 0.012643459603  | 0.019619161453  |
| F <sub>11,9,8,4</sub>    | 0.057113558781  | -0.014823366415 |
| F <sub>11,9,8,5</sub>    | -0.009155608687 | -0.024850937821 |
| F <sub>11,9,8,6</sub>    | 0.035750472079  | -0.004795795031 |
| F <sub>11,9,8,7</sub>    | -0.039674304214 | -0.050573838366 |
| F <sub>11,9,8,8</sub>    | -0.003495533898 | -0.015023206064 |
| F <sub>11,9,9,9</sub>    | -0.063544196576 | -0.087480524938 |
| F <sub>12,10,10,10</sub> | 0.535627523773  | 0.491643307127  |
| F <sub>12,10,10,9</sub>  | 1.013914878517  | 0.984500690476  |
| F <sub>12,10,1,1</sub>   | -0.212871247825 | -0.256538928479 |
| F <sub>12,10,2,1</sub>   | 0.453420619872  | 0.409822483387  |
| F <sub>12,10,2,2</sub>   | 0.597873685616  | 0.572968237432  |
| F <sub>12,10,3,1</sub>   | 0.063217297959  | 0.051881782474  |
| F <sub>12,10,3,2</sub>   | -0.343553315877 | -0.303879011591 |
| F <sub>12,10,3,3</sub>   | 0.105244810523  | 0.094711713727  |
| F <sub>12,10,4,1</sub>   | 0.463012209884  | 0.390639303268  |
| F <sub>12,10,4,2</sub>   | 0.657459898878  | 0.710213644078  |
| F <sub>12,10,4,3</sub>   | 0.102455620862  | 0.101583658115  |
| F <sub>12,10,4,4</sub>   | -0.745790814600 | -0.770816533531 |
| F <sub>12,10,5,1</sub>   | 0.630429054212  | 0.577239327649  |
| F <sub>12,10,5,2</sub>   | 1.398192238522  | 1.399936163984  |
| F <sub>12,10,5,3</sub>   | 0.049701875645  | -0.024414956467 |
| F <sub>12,10,5,4</sub>   | -0.695826258998 | -0.714137476358 |

|                          |                 |                 |
|--------------------------|-----------------|-----------------|
| F <sub>12,10,5,5</sub>   | 0.797402812315  | 0.726734354830  |
| F <sub>12,10,6,1</sub>   | -0.009155608632 | -0.059293465569 |
| F <sub>12,10,6,2</sub>   | 0.412438371451  | 0.301699104781  |
| F <sub>12,10,6,3</sub>   | 0.011335515646  | 0.005667757764  |
| F <sub>12,10,6,4</sub>   | 0.052753745203  | 0.059293466011  |
| F <sub>12,10,6,5</sub>   | 0.242405639093  | 0.129922446846  |
| F <sub>12,10,6,6</sub>   | -0.041846282043 | -0.075531492924 |
| F <sub>12,10,7,1</sub>   | 0.109431322715  | 0.086760291691  |
| F <sub>12,10,7,2</sub>   | 0.009155608670  | -0.043162155158 |
| F <sub>12,10,7,3</sub>   | 0.089812161244  | 0.046214024715  |
| F <sub>12,10,7,4</sub>   | -0.118586931370 | -0.145617775985 |
| F <sub>12,10,7,5</sub>   | 0.147797682831  | 0.152593477853  |
| F <sub>12,10,7,6</sub>   | 0.083708422004  | 0.069321037045  |
| F <sub>12,10,7,7</sub>   | 0.146317261821  | 0.079798143908  |
| F <sub>12,10,8,1</sub>   | 0.042290192548  | 0.037058416063  |
| F <sub>12,10,8,2</sub>   | 0.188779930959  | 0.030082714205  |
| F <sub>12,10,8,3</sub>   | 0.187036005718  | 0.081528515311  |
| F <sub>12,10,8,4</sub>   | -0.094171975306 | -0.076732720287 |
| F <sub>12,10,8,5</sub>   | 0.061909353828  | 0.025286919187  |
| F <sub>12,10,8,6</sub>   | -0.173084601422 | -0.155209366078 |
| F <sub>12,10,8,7</sub>   | -0.176572452799 | -0.198371521218 |
| F <sub>12,10,8,8</sub>   | 0.089128533946  | 0.028863493523  |
| F <sub>12,10,9,9</sub>   | -0.149069933268 | -0.186724540838 |
| F <sub>12,11,10,10</sub> | -0.141907395984 | -0.190514226378 |
| F <sub>12,11,10,9</sub>  | 0.046650006090  | 0.016131310510  |
| F <sub>12,11,1,1</sub>   | 0.070534875231  | 0.055994334307  |
| F <sub>12,11,11,10</sub> | 0.113855895427  | 0.119334377611  |
| F <sub>12,11,11,11</sub> | 0.047141529595  | 0.074832221630  |
| F <sub>12,11,11,9</sub>  | 0.030864096030  | 0.045164306218  |
| F <sub>12,11,2,1</sub>   | 0.044034117913  | 0.046650006090  |
| F <sub>12,11,2,2</sub>   | -0.648623903821 | -0.688421296212 |
| F <sub>12,11,3,1</sub>   | -0.120766838198 | -0.012643459590 |
| F <sub>12,11,3,2</sub>   | 0.031826639670  | 0.122074782287  |
| F <sub>12,11,3,3</sub>   | 0.069272032581  | 0.040299005045  |
| F <sub>12,11,4,1</sub>   | 0.020927105565  | 0.017003273278  |
| F <sub>12,11,4,2</sub>   | 0.301699104790  | 0.292107514750  |
| F <sub>12,11,4,3</sub>   | -0.184420117527 | -0.202731334862 |
| F <sub>12,11,4,4</sub>   | -0.130858447852 | -0.141129378121 |
| F <sub>12,11,5,1</sub>   | 0.091992068089  | 0.013515422317  |
| F <sub>12,11,5,2</sub>   | 0.073244869366  | 0.097223844457  |
| F <sub>12,11,5,3</sub>   | -0.090684123988 | -0.056677577479 |
| F <sub>12,11,5,4</sub>   | -0.163057030629 | -0.119458894096 |
| F <sub>12,11,5,5</sub>   | -0.124183422724 | -0.141430054980 |
| F <sub>12,11,6,1</sub>   | 0.036186453292  | 0.012643459505  |
| F <sub>12,11,6,2</sub>   | -0.100275713922 | -0.071064962537 |
| F <sub>12,11,6,3</sub>   | -0.040110285691 | -0.078476645749 |
| F <sub>12,11,6,4</sub>   | -0.123382726443 | -0.108559360156 |
| F <sub>12,11,6,5</sub>   | -0.018311217336 | -0.037058416043 |
| F <sub>12,11,6,6</sub>   | -0.043120956531 | -0.071312224218 |
| F <sub>12,11,7,1</sub>   | -0.084580384886 | 0.006103739111  |
| F <sub>12,11,7,2</sub>   | -0.098095807197 | -0.026158881926 |
| F <sub>12,11,7,3</sub>   | -0.219298626736 | -0.189651893897 |



|                          |                 |                 |
|--------------------------|-----------------|-----------------|
| F <sub>12,11,7,4</sub>   | -0.095043937629 | -0.083272440793 |
| F <sub>12,11,7,5</sub>   | 0.232378067710  | 0.181804229334  |
| F <sub>12,11,7,6</sub>   | -0.210143018009 | -0.132538335038 |
| F <sub>12,11,7,7</sub>   | -0.178786330391 | -0.258874414410 |
| F <sub>12,11,8,1</sub>   | -0.054061689361 | -0.020491124168 |
| F <sub>12,11,8,2</sub>   | -0.032698602245 | -0.042290192441 |
| F <sub>12,11,8,3</sub>   | 0.081964496672  | 0.108559359954  |
| F <sub>12,11,8,4</sub>   | 0.066705149097  | 0.031390658293  |
| F <sub>12,11,8,5</sub>   | 0.057113558877  | 0.089812161248  |
| F <sub>12,11,8,6</sub>   | 0.009155608203  | 0.063653279352  |
| F <sub>12,11,8,7</sub>   | -0.001307944187 | -0.039238322872 |
| F <sub>12,11,8,8</sub>   | -0.024779671677 | -0.050024306658 |
| F <sub>12,11,9,9</sub>   | 0.061666836173  | 0.055495525370  |
| F <sub>12,12,10,10</sub> | 1.417340967687  | 1.393382366826  |
| F <sub>12,12,10,9</sub>  | 0.165662465232  | 0.154365823268  |
| F <sub>12,12,1,1</sub>   | -0.589292522204 | -0.595187682272 |
| F <sub>12,12,11,10</sub> | -0.013748041764 | -0.027743122407 |
| F <sub>12,12,11,11</sub> | -0.235686229023 | -0.194051242605 |
| F <sub>12,12,11,9</sub>  | 0.002477903148  | 0.064162628742  |
| F <sub>12,12,12,10</sub> | 0.710489588296  | 0.706146138887  |
| F <sub>12,12,12,11</sub> | -0.075603993238 | -0.057571965323 |
| F <sub>12,12,12,12</sub> | 2.132277629775  | 2.015565844037  |
| F <sub>12,12,12,9</sub>  | -0.140524053155 | -0.103566223450 |
| F <sub>12,12,2,1</sub>   | 0.426628573535  | 0.397463220893  |
| F <sub>12,12,2,2</sub>   | 3.738157352932  | 3.727460110862  |
| F <sub>12,12,3,1</sub>   | 0.053955631607  | 0.039805571760  |
| F <sub>12,12,3,2</sub>   | -0.086866400538 | -0.076030208959 |
| F <sub>12,12,3,3</sub>   | -0.221243307832 | -0.218400294017 |
| F <sub>12,12,4,1</sub>   | -0.142522713335 | -0.165524609933 |
| F <sub>12,12,4,2</sub>   | -0.930396962538 | -0.964111696800 |
| F <sub>12,12,4,3</sub>   | -0.116155007731 | -0.102432413592 |
| F <sub>12,12,4,4</sub>   | 0.257351721993  | 0.246707350361  |
| F <sub>12,12,5,1</sub>   | 0.003660244233  | 0.030381182676  |
| F <sub>12,12,5,2</sub>   | -0.585628854019 | -0.630704895236 |
| F <sub>12,12,5,3</sub>   | 0.132886254978  | 0.133367577610  |
| F <sub>12,12,5,4</sub>   | -0.166774316744 | -0.184915177135 |
| F <sub>12,12,5,5</sub>   | 2.077114473295  | 2.115988441790  |
| F <sub>12,12,6,1</sub>   | 0.002693116824  | -0.003315258457 |
| F <sub>12,12,6,2</sub>   | 0.271251660808  | 0.303850146577  |
| F <sub>12,12,6,3</sub>   | -0.185345815763 | -0.165166234840 |
| F <sub>12,12,6,4</sub>   | 0.049795585452  | 0.074718300369  |
| F <sub>12,12,6,5</sub>   | 0.133166855946  | 0.076050203299  |
| F <sub>12,12,6,6</sub>   | 0.201750566999  | 0.208984875154  |
| F <sub>12,12,7,1</sub>   | -0.168302767240 | -0.136305580839 |
| F <sub>12,12,7,2</sub>   | 2.206965667484  | 2.266076642224  |
| F <sub>12,12,7,3</sub>   | -0.162542162204 | -0.111670300639 |
| F <sub>12,12,7,4</sub>   | -0.148477841175 | -0.194907012761 |
| F <sub>12,12,7,5</sub>   | -2.461469471805 | -2.437303133574 |
| F <sub>12,12,7,6</sub>   | 0.113773864720  | 0.132417777182  |
| F <sub>12,12,7,7</sub>   | 1.893281887322  | 1.891005699785  |
| F <sub>12,12,8,1</sub>   | 0.012269637113  | -0.012646814331 |
| F <sub>12,12,8,2</sub>   | -0.116139952352 | -0.103935440572 |

|                          |                 |                 |
|--------------------------|-----------------|-----------------|
| F <sub>12,12,8,3</sub>   | 0.026618001293  | 0.010069334413  |
| F <sub>12,12,8,4</sub>   | 0.259550138039  | 0.195857731222  |
| F <sub>12,12,8,5</sub>   | -0.063190625433 | -0.060209707245 |
| F <sub>12,12,8,6</sub>   | -0.098257568189 | -0.147348830870 |
| F <sub>12,12,8,7</sub>   | 0.174994725472  | 0.163488765494  |
| F <sub>12,12,8,8</sub>   | -0.038154508623 | -0.029849271974 |
| F <sub>12,12,9,9</sub>   | -0.517179367387 | -0.526374023705 |
| F <sub>12,9,1,1</sub>    | -0.476676858094 | -0.456582307953 |
| F <sub>12,9,2,1</sub>    | -0.484811278249 | -0.440777160321 |
| F <sub>12,9,2,2</sub>    | 1.479045343669  | 1.539370450033  |
| F <sub>12,9,3,1</sub>    | 0.024414956453  | -0.009155608649 |
| F <sub>12,9,3,2</sub>    | -0.020055142797 | 0.017439254616  |
| F <sub>12,9,3,3</sub>    | 0.055821761271  | 0.024560713345  |
| F <sub>12,9,4,1</sub>    | 0.265948632780  | 0.249381340893  |
| F <sub>12,9,4,2</sub>    | -0.419414073399 | -0.452112675815 |
| F <sub>12,9,4,3</sub>    | -0.011771496843 | 0.057549540231  |
| F <sub>12,9,4,4</sub>    | 0.486511214776  | 0.487783396948  |
| F <sub>12,9,5,1</sub>    | -0.227146291328 | -0.281207980621 |
| F <sub>12,9,5,2</sub>    | 0.500070626012  | 0.393255191499  |
| F <sub>12,9,5,3</sub>    | 0.098531788558  | 0.092428049452  |
| F <sub>12,9,5,4</sub>    | 0.177008434327  | 0.163928993360  |
| F <sub>12,9,5,5</sub>    | 0.120166597046  | 0.117169168765  |
| F <sub>12,9,6,1</sub>    | -0.094607956222 | -0.089376179774 |
| F <sub>12,9,6,2</sub>    | 0.071064962438  | 0.075860757565  |
| F <sub>12,9,6,3</sub>    | 0.005667757910  | 0.006539720488  |
| F <sub>12,9,6,4</sub>    | -0.139514036867 | -0.090248142318 |
| F <sub>12,9,6,5</sub>    | -0.026594863282 | -0.035314490609 |
| F <sub>12,9,6,6</sub>    | -0.036967100622 | -0.028057727741 |
| F <sub>12,9,7,1</sub>    | 0.374507992813  | 0.289927607919  |
| F <sub>12,9,7,2</sub>    | -0.558056147582 | -0.494838849616 |
| F <sub>12,9,7,3</sub>    | -0.049701875652 | -0.028774770117 |
| F <sub>12,9,7,4</sub>    | 0.386279489637  | 0.290363589318  |
| F <sub>12,9,7,5</sub>    | -0.107687397236 | -0.108123378600 |
| F <sub>12,9,7,6</sub>    | -0.029646732991 | -0.051009819773 |
| F <sub>12,9,7,7</sub>    | 0.073982640186  | 0.065933841304  |
| F <sub>12,9,8,1</sub>    | 0.085452347697  | 0.053625707936  |
| F <sub>12,9,8,2</sub>    | -0.085888329178 | -0.051009819744 |
| F <sub>12,9,8,3</sub>    | -0.008719627297 | -0.034006546498 |
| F <sub>12,9,8,4</sub>    | -0.027466826337 | 0.050137857021  |
| F <sub>12,9,8,5</sub>    | -0.036186453350 | 0.005231776383  |
| F <sub>12,9,8,6</sub>    | 0.074988795218  | 0.033570565081  |
| F <sub>12,9,8,7</sub>    | 0.001743925586  | 0.003051869552  |
| F <sub>12,9,8,8</sub>    | -0.071364526681 | -0.027757050652 |
| F <sub>12,9,9,9</sub>    | -0.638213550074 | -0.606822867069 |
| F <sub>13,10,10,10</sub> | -0.797485562670 | -0.787404767485 |
| F <sub>13,10,10,9</sub>  | -0.051510310556 | -0.043453890876 |
| F <sub>13,10,1,1</sub>   | 0.013862439116  | 0.028655052276  |
| F <sub>13,10,2,1</sub>   | -0.045342062074 | 0.025286919188  |
| F <sub>13,10,2,2</sub>   | 0.576188197587  | 0.645162770497  |
| F <sub>13,10,3,1</sub>   | -0.070628981189 | -0.003923832253 |
| F <sub>13,10,3,2</sub>   | 0.514893992402  | 0.455600526735  |
| F <sub>13,10,3,3</sub>   | 0.033045619474  | 0.030338842735  |

|                          |                 |                 |
|--------------------------|-----------------|-----------------|
| F <sub>13,10,4,1</sub>   | -0.126870577438 | -0.096787863198 |
| F <sub>13,10,4,2</sub>   | 0.226710309985  | 0.285567794271  |
| F <sub>13,10,4,3</sub>   | -0.237609844065 | -0.153029459224 |
| F <sub>13,10,4,4</sub>   | -0.024443785651 | -0.032081662186 |
| F <sub>13,10,5,1</sub>   | -0.026158881940 | -0.082400478052 |
| F <sub>13,10,5,2</sub>   | 0.074988794839  | 0.136462167341  |
| F <sub>13,10,5,3</sub>   | -0.186164042984 | -0.183112173430 |
| F <sub>13,10,5,4</sub>   | -0.036186453284 | -0.079784589836 |
| F <sub>13,10,5,5</sub>   | 0.079710658788  | 0.087647841139  |
| F <sub>13,10,6,1</sub>   | 0.228890216950  | 0.237173862990  |
| F <sub>13,10,6,2</sub>   | 0.631736998045  | 0.574187458102  |
| F <sub>13,10,6,3</sub>   | 0.162185068219  | 0.268564521103  |
| F <sub>13,10,6,4</sub>   | -0.037494397511 | -0.020055142215 |
| F <sub>13,10,6,5</sub>   | -0.210143018074 | -0.050137857062 |
| F <sub>13,10,6,6</sub>   | 0.643058718334  | 0.595611232670  |
| F <sub>13,10,7,1</sub>   | -0.094607956212 | -0.006539720494 |
| F <sub>13,10,7,2</sub>   | 0.407206595179  | 0.440777160321  |
| F <sub>13,10,7,3</sub>   | 0.105507490384  | 0.069757018424  |
| F <sub>13,10,7,4</sub>   | -0.085888328998 | -0.097659825767 |
| F <sub>13,10,7,5</sub>   | -0.201423390775 | -0.203167316228 |
| F <sub>13,10,7,6</sub>   | -0.047957950435 | -0.021799068295 |
| F <sub>13,10,7,7</sub>   | 0.432584956031  | 0.422962612257  |
| F <sub>13,10,8,1</sub>   | 0.039674304500  | 0.032698602409  |
| F <sub>13,10,8,2</sub>   | -0.230634142767 | -0.221478533580 |
| F <sub>13,10,8,3</sub>   | 0.094171974898  | 0.190087875265  |
| F <sub>13,10,8,4</sub>   | 0.051445800185  | 0.003487850946  |
| F <sub>13,10,8,5</sub>   | -0.075424776277 | -0.086760291697 |
| F <sub>13,10,8,6</sub>   | -0.214938811445 | -0.194447688996 |
| F <sub>13,10,8,7</sub>   | 0.144745813610  | 0.053189726555  |
| F <sub>13,10,8,8</sub>   | 0.102562096787  | 0.042486185206  |
| F <sub>13,10,9,9</sub>   | -0.025730328988 | 0.042823003444  |
| F <sub>13,11,10,10</sub> | 0.547245255848  | 0.436409325236  |
| F <sub>13,11,10,9</sub>  | 0.073244869370  | 0.040546266976  |
| F <sub>13,11,1,1</sub>   | 0.054770460129  | 0.039687543222  |
| F <sub>13,11,11,10</sub> | 0.128839597781  | 0.069388801335  |
| F <sub>13,11,11,11</sub> | -0.695355072057 | -0.666423540864 |
| F <sub>13,11,11,9</sub>  | 0.025571194818  | -0.007180241279 |
| F <sub>13,11,2,1</sub>   | -0.025722900585 | -0.024850937820 |
| F <sub>13,11,2,2</sub>   | 0.383350071250  | 0.357382653963  |
| F <sub>13,11,3,1</sub>   | -0.089376179872 | -0.071936925272 |
| F <sub>13,11,3,2</sub>   | -0.008283645952 | -0.115971043166 |
| F <sub>13,11,3,3</sub>   | -0.633117931207 | -0.662452928524 |
| F <sub>13,11,4,1</sub>   | -0.009155608725 | -0.019183180134 |
| F <sub>13,11,4,2</sub>   | -0.059729447045 | -0.071064962541 |
| F <sub>13,11,4,3</sub>   | 0.034878509228  | 0.077604683015  |
| F <sub>13,11,4,4</sub>   | -0.098755115757 | -0.091587949324 |
| F <sub>13,11,5,1</sub>   | 0.036622434674  | 0.039674304231  |
| F <sub>13,11,5,2</sub>   | 0.001743925466  | 0.028774770121  |
| F <sub>13,11,5,3</sub>   | -0.063653279328 | 0.029646732842  |
| F <sub>13,11,5,4</sub>   | -0.123382726366 | -0.087632254422 |
| F <sub>13,11,5,5</sub>   | -0.298224107466 | -0.277586619976 |
| F <sub>13,11,6,1</sub>   | 0.043598136571  | -0.048829912766 |

|                          |                 |                 |
|--------------------------|-----------------|-----------------|
| F <sub>13,11,6,2</sub>   | 0.237609843972  | 0.121638800936  |
| F <sub>13,11,6,3</sub>   | -0.290799570530 | -0.272052371891 |
| F <sub>13,11,6,4</sub>   | -0.003487850933 | -0.048393931269 |
| F <sub>13,11,6,5</sub>   | -0.065397204795 | -0.059729447076 |
| F <sub>13,11,6,6</sub>   | 0.163976275197  | 0.156169736741  |
| F <sub>13,11,7,1</sub>   | 0.047957950207  | 0.017875235979  |
| F <sub>13,11,7,2</sub>   | -0.160877123796 | -0.131230390954 |
| F <sub>13,11,7,3</sub>   | -0.094171974909 | -0.068449074357 |
| F <sub>13,11,7,4</sub>   | 0.119022912708  | 0.068885055730  |
| F <sub>13,11,7,5</sub>   | 0.231942086340  | 0.219734608111  |
| F <sub>13,11,7,6</sub>   | -0.030082714317 | -0.069757018440 |
| F <sub>13,11,7,7</sub>   | -0.375979128762 | -0.401104651105 |
| F <sub>13,11,8,1</sub>   | -0.031390658177 | -0.000435981363 |
| F <sub>13,11,8,2</sub>   | 0.089812160987  | 0.122510763648  |
| F <sub>13,11,8,3</sub>   | 0.045342061964  | -0.026594863283 |
| F <sub>13,11,8,4</sub>   | 0.054061688848  | 0.032698602409  |
| F <sub>13,11,8,5</sub>   | 0.142129925056  | 0.177880397045  |
| F <sub>13,11,8,6</sub>   | 0.063217298811  | 0.104199546274  |
| F <sub>13,11,8,7</sub>   | -0.092428049282 | -0.120766838196 |
| F <sub>13,11,8,8</sub>   | -0.114751121465 | -0.079079794244 |
| F <sub>13,11,9,9</sub>   | 0.018545186827  | 0.064895071158  |
| F <sub>13,12,10,10</sub> | 0.072276419582  | 0.106287391653  |
| F <sub>13,12,10,9</sub>  | 0.074988794831  | 0.020927105531  |
| F <sub>13,12,1,1</sub>   | -0.026653844376 | -0.025393049010 |
| F <sub>13,12,11,10</sub> | 0.091556086704  | 0.054497670659  |
| F <sub>13,12,11,11</sub> | -0.055727709280 | -0.051828516854 |
| F <sub>13,12,11,9</sub>  | -0.020927105535 | 0.009591590036  |
| F <sub>13,12,12,10</sub> | 0.107621837942  | 0.172222272631  |
| F <sub>13,12,12,11</sub> | -0.140733338584 | -0.141818226781 |
| F <sub>13,12,12,12</sub> | 0.128603782784  | 0.097151156813  |
| F <sub>13,12,12,9</sub>  | -0.029129933813 | -0.030200057365 |
| F <sub>13,12,2,1</sub>   | -0.071936925247 | -0.088504217150 |
| F <sub>13,12,2,2</sub>   | 0.409507926949  | 0.401147064669  |
| F <sub>13,12,3,1</sub>   | 0.038802341516  | 0.055805614747  |
| F <sub>13,12,3,2</sub>   | -0.073680850739 | -0.074552813457 |
| F <sub>13,12,3,3</sub>   | -0.096711539713 | -0.056302624533 |
| F <sub>13,12,4,1</sub>   | 0.117278987321  | 0.039674304295  |
| F <sub>13,12,4,2</sub>   | -0.028338788741 | -0.056677577488 |
| F <sub>13,12,4,3</sub>   | -0.074116832115 | -0.109867304053 |
| F <sub>13,12,4,4</sub>   | 0.132404184770  | 0.123381833522  |
| F <sub>13,12,5,1</sub>   | 0.088068235801  | 0.010899534135  |
| F <sub>13,12,5,2</sub>   | -0.049701875639 | -0.005231776384 |
| F <sub>13,12,5,3</sub>   | -0.071500943901 | -0.033134583756 |
| F <sub>13,12,5,4</sub>   | 0.064961223417  | 0.054497670652  |
| F <sub>13,12,5,5</sub>   | 0.285268271881  | 0.221643012867  |
| F <sub>13,12,6,1</sub>   | 0.088068235743  | 0.009155608548  |
| F <sub>13,12,6,2</sub>   | 0.025286919308  | 0.016567291890  |
| F <sub>13,12,6,3</sub>   | -0.102891602311 | -0.029646732865 |
| F <sub>13,12,6,4</sub>   | 0.251561247782  | 0.153901421684  |
| F <sub>13,12,6,5</sub>   | -0.015259347782 | 0.084144403525  |
| F <sub>13,12,6,6</sub>   | 0.328625866849  | 0.295789912847  |
| F <sub>13,12,7,1</sub>   | -0.074988794857 | 0.000871962725  |

|                          |                 |                 |
|--------------------------|-----------------|-----------------|
| F <sub>13,12,7,2</sub>   | 0.192267782105  | 0.258972930988  |
| F <sub>13,12,7,3</sub>   | -0.117278987262 | -0.170032732462 |
| F <sub>13,12,7,4</sub>   | -0.129922446849 | -0.068449074365 |
| F <sub>13,12,7,5</sub>   | -0.195755633023 | -0.188779931174 |
| F <sub>13,12,7,6</sub>   | 0.118586931438  | 0.143873850557  |
| F <sub>13,12,7,7</sub>   | 0.368555746343  | 0.342334681948  |
| F <sub>13,12,8,1</sub>   | 0.093300012091  | 0.001307944088  |
| F <sub>13,12,8,2</sub>   | -0.078476645551 | -0.035750471955 |
| F <sub>13,12,8,3</sub>   | 0.167852825639  | 0.106379453134  |
| F <sub>13,12,8,4</sub>   | -0.079784589502 | -0.114663099079 |
| F <sub>13,12,8,5</sub>   | -0.222350496279 | -0.146489738740 |
| F <sub>13,12,8,6</sub>   | -0.076732721007 | -0.117714968609 |
| F <sub>13,12,8,7</sub>   | 0.018747198576  | 0.057113558860  |
| F <sub>13,12,8,8</sub>   | 0.220682894149  | 0.158801560914  |
| F <sub>13,12,9,9</sub>   | 0.015947627180  | -0.015903652345 |
| F <sub>13,13,10,10</sub> | -0.069231923507 | -0.082958284835 |
| F <sub>13,13,10,9</sub>  | -0.090752708407 | -0.077983179019 |
| F <sub>13,13,1,1</sub>   | -0.064907916094 | -0.072973914204 |
| F <sub>13,13,11,10</sub> | 0.340559481109  | 0.319239913509  |
| F <sub>13,13,11,11</sub> | -0.265208325008 | -0.260558568707 |
| F <sub>13,13,11,9</sub>  | -0.020774436312 | -0.036636262916 |
| F <sub>13,13,12,10</sub> | -0.067977399240 | -0.138417805543 |
| F <sub>13,13,12,11</sub> | -0.008322705686 | -0.052162806445 |
| F <sub>13,13,12,12</sub> | 0.107761615477  | 0.164335534843  |
| F <sub>13,13,12,9</sub>  | -0.065458720298 | -0.038892900987 |
| F <sub>13,13,13,10</sub> | 0.626094206114  | 0.618199154012  |
| F <sub>13,13,13,11</sub> | 0.183650434417  | 0.169587495625  |
| F <sub>13,13,13,12</sub> | 0.289648591743  | 0.266781445004  |
| F <sub>13,13,13,13</sub> | -0.089500910868 | -0.076290989070 |
| F <sub>13,13,13,9</sub>  | 0.152519043896  | 0.128814477097  |
| F <sub>13,13,2,1</sub>   | 0.191064488288  | 0.199125236628  |
| F <sub>13,13,2,2</sub>   | 0.634298082241  | 0.645289879042  |
| F <sub>13,13,3,1</sub>   | -0.053362858168 | -0.045244331537 |
| F <sub>13,13,3,2</sub>   | 0.104026362984  | 0.116539406403  |
| F <sub>13,13,3,3</sub>   | -0.272215328816 | -0.258368916263 |
| F <sub>13,13,4,1</sub>   | 0.120608808788  | 0.077283474747  |
| F <sub>13,13,4,2</sub>   | -0.169039350375 | -0.179412313231 |
| F <sub>13,13,4,3</sub>   | -0.068197057462 | -0.047431686638 |
| F <sub>13,13,4,4</sub>   | 0.007266876946  | 0.007810983295  |
| F <sub>13,13,5,1</sub>   | -0.004455716559 | 0.058216915916  |
| F <sub>13,13,5,2</sub>   | -0.118793423172 | -0.111887070532 |
| F <sub>13,13,5,3</sub>   | -0.073433542019 | -0.069933886725 |
| F <sub>13,13,5,4</sub>   | 0.059734771047  | 0.099545895133  |
| F <sub>13,13,5,5</sub>   | 0.189497507045  | 0.169747408742  |
| F <sub>13,13,6,1</sub>   | 0.069163505378  | 0.054167203291  |
| F <sub>13,13,6,2</sub>   | 0.881223134465  | 0.879278475022  |
| F <sub>13,13,6,3</sub>   | 0.202275157997  | 0.167252785710  |
| F <sub>13,13,6,4</sub>   | 0.024844044543  | 0.080553763051  |
| F <sub>13,13,6,5</sub>   | 0.021823923872  | -0.000145923719 |
| F <sub>13,13,6,6</sub>   | -0.096479545821 | -0.094950214959 |
| F <sub>13,13,7,1</sub>   | 0.013400851011  | 0.034733261994  |
| F <sub>13,13,7,2</sub>   | -0.067582651443 | -0.019538896785 |

|                          |                 |                 |
|--------------------------|-----------------|-----------------|
| F <sub>13,13,7,3</sub>   | -0.125651430913 | -0.037419320551 |
| F <sub>13,13,7,4</sub>   | -0.038610536114 | -0.028295056464 |
| F <sub>13,13,7,5</sub>   | -0.130377722417 | -0.134717858202 |
| F <sub>13,13,7,6</sub>   | 0.448003885645  | 0.442702355746  |
| F <sub>13,13,7,7</sub>   | 0.272989736208  | 0.273316522527  |
| F <sub>13,13,8,1</sub>   | -0.028913834171 | -0.040080103381 |
| F <sub>13,13,8,2</sub>   | -0.033102265162 | -0.036660162205 |
| F <sub>13,13,8,3</sub>   | 0.102948278480  | 0.117320750247  |
| F <sub>13,13,8,4</sub>   | 0.078651416183  | 0.061508396914  |
| F <sub>13,13,8,5</sub>   | -0.053330738797 | -0.062020706753 |
| F <sub>13,13,8,6</sub>   | -0.072702358147 | 0.011415458888  |
| F <sub>13,13,8,7</sub>   | 0.031590391397  | -0.010903780763 |
| F <sub>13,13,8,8</sub>   | -0.051157974543 | -0.056514075139 |
| F <sub>13,13,9,9</sub>   | -0.136169754540 | -0.121724008077 |
| F <sub>13,9,1,1</sub>    | 0.111900573698  | 0.076430605631  |
| F <sub>13,9,2,1</sub>    | -0.112483192235 | -0.083708422127 |
| F <sub>13,9,2,2</sub>    | 0.102759998841  | 0.053037950306  |
| F <sub>13,9,3,1</sub>    | 0.049265894274  | 0.026158881924  |
| F <sub>13,9,3,2</sub>    | 0.001743925457  | 0.030082714206  |
| F <sub>13,9,3,3</sub>    | 0.007926534973  | -0.007458222613 |
| F <sub>13,9,4,1</sub>    | 0.021799068270  | -0.045342061993 |
| F <sub>13,9,4,2</sub>    | -0.041854211076 | 0.023978975104  |
| F <sub>13,9,4,3</sub>    | 0.080656552579  | -0.016131310509 |
| F <sub>13,9,4,4</sub>    | -0.056899383880 | -0.066030063934 |
| F <sub>13,9,5,1</sub>    | 0.012207478228  | -0.030518695565 |
| F <sub>13,9,5,2</sub>    | -0.132102353684 | -0.086760291701 |
| F <sub>13,9,5,3</sub>    | 0.043598136518  | 0.018311217357  |
| F <sub>13,9,5,4</sub>    | -0.058857484312 | -0.026158881921 |
| F <sub>13,9,5,5</sub>    | 0.005761662037  | -0.016478526700 |
| F <sub>13,9,6,1</sub>    | 0.004795795007  | 0.042726173780  |
| F <sub>13,9,6,2</sub>    | -0.072808887991 | -0.056241596116 |
| F <sub>13,9,6,3</sub>    | -0.028774770137 | -0.017875235982 |
| F <sub>13,9,6,4</sub>    | -0.025722900546 | -0.037930378821 |
| F <sub>13,9,6,5</sub>    | -0.126870577309 | -0.076296738914 |
| F <sub>13,9,6,6</sub>    | 0.139442568937  | 0.129951076734  |
| F <sub>13,9,7,1</sub>    | -0.133410297780 | -0.071064962548 |
| F <sub>13,9,7,2</sub>    | 0.211450962178  | 0.148233664197  |
| F <sub>13,9,7,3</sub>    | -0.005667757758 | 0.009155608678  |
| F <sub>13,9,7,4</sub>    | 0.050573838376  | -0.009591590043 |
| F <sub>13,9,7,5</sub>    | -0.077168701658 | -0.021363086900 |
| F <sub>13,9,7,6</sub>    | -0.074116832082 | -0.020491124158 |
| F <sub>13,9,7,7</sub>    | 0.033423927941  | 0.009199272351  |
| F <sub>13,9,8,1</sub>    | 0.021363086878  | 0.022671030993  |
| F <sub>13,9,8,2</sub>    | 0.081528515354  | 0.028338788740  |
| F <sub>13,9,8,3</sub>    | 0.027030844632  | -0.010463552767 |
| F <sub>13,9,8,4</sub>    | 0.030518695637  | -0.006539720480 |
| F <sub>13,9,8,5</sub>    | -0.107251415857 | 0.013079440961  |
| F <sub>13,9,8,6</sub>    | -0.012643459672 | -0.037058416042 |
| F <sub>13,9,8,7</sub>    | -0.027466826037 | 0.026594863290  |
| F <sub>13,9,8,8</sub>    | 0.029996212350  | 0.006914128624  |
| F <sub>13,9,9,9</sub>    | 0.165128966442  | 0.154637988702  |
| F <sub>14,10,10,10</sub> | -0.723958612054 | -0.659091061879 |

|                          |                 |                 |
|--------------------------|-----------------|-----------------|
| F <sub>14,10,10,9</sub>  | 0.484882540580  | 0.442223245108  |
| F <sub>14,10,1,1</sub>   | 0.155587428288  | 0.136960360616  |
| F <sub>14,10,2,1</sub>   | -0.181368247854 | -0.193575726187 |
| F <sub>14,10,2,2</sub>   | -0.664538621572 | -0.634395911444 |
| F <sub>14,10,3,1</sub>   | 0.060601409788  | -0.057113558888 |
| F <sub>14,10,3,2</sub>   | -0.317394433903 | -0.179624322492 |
| F <sub>14,10,3,3</sub>   | 0.153542825672  | 0.203470069185  |
| F <sub>14,10,4,1</sub>   | 0.213630869179  | 0.209707036792  |
| F <sub>14,10,4,2</sub>   | -0.132974316420 | -0.119458894081 |
| F <sub>14,10,4,3</sub>   | -0.013079440989 | 0.051009819746  |
| F <sub>14,10,4,4</sub>   | 0.367985522352  | 0.363610535470  |
| F <sub>14,10,5,1</sub>   | 0.116407024569  | 0.124254689124  |
| F <sub>14,10,5,2</sub>   | 0.122074782281  | 0.112047210882  |
| F <sub>14,10,5,3</sub>   | 0.007847664568  | 0.010463552783  |
| F <sub>14,10,5,4</sub>   | -0.172648620711 | -0.208835074000 |
| F <sub>14,10,5,5</sub>   | 0.182347664230  | 0.216940390354  |
| F <sub>14,10,6,1</sub>   | -0.059293465813 | -0.054061689585 |
| F <sub>14,10,6,2</sub>   | 0.108123378904  | 0.112483192260  |
| F <sub>14,10,6,3</sub>   | 0.113355154531  | 0.105071508998  |
| F <sub>14,10,6,4</sub>   | 0.086760291755  | 0.083708421220  |
| F <sub>14,10,6,5</sub>   | -0.015259347776 | -0.018311217281 |
| F <sub>14,10,6,6</sub>   | -0.287790586265 | -0.276951326434 |
| F <sub>14,10,7,1</sub>   | 0.434673421136  | 0.403282762912  |
| F <sub>14,10,7,2</sub>   | 0.503558476932  | 0.428569682088  |
| F <sub>14,10,7,3</sub>   | 0.203167316243  | 0.176572452965  |
| F <sub>14,10,7,4</sub>   | 0.080220571250  | 0.034006546431  |
| F <sub>14,10,7,5</sub>   | 0.164364974725  | 0.179188341133  |
| F <sub>14,10,7,6</sub>   | 0.041854211426  | 0.084144403580  |
| F <sub>14,10,7,7</sub>   | -0.955834308838 | -0.922324018235 |
| F <sub>14,10,8,1</sub>   | 0.030954676597  | 0.035750471944  |
| F <sub>14,10,8,2</sub>   | 0.144309832567  | 0.160877123791  |
| F <sub>14,10,8,3</sub>   | 0.009155608677  | -0.006539720480 |
| F <sub>14,10,8,4</sub>   | 0.009155609737  | 0.043162155145  |
| F <sub>14,10,8,5</sub>   | 0.057549540313  | -0.023978975088 |
| F <sub>14,10,8,6</sub>   | 0.010027569404  | -0.045778043253 |
| F <sub>14,10,8,7</sub>   | -0.264640689169 | -0.216246757178 |
| F <sub>14,10,8,8</sub>   | -0.091027686632 | -0.085660744756 |
| F <sub>14,10,9,9</sub>   | -0.119192786946 | -0.002866945929 |
| F <sub>14,11,10,10</sub> | -0.159112305675 | -0.097049274619 |
| F <sub>14,11,10,9</sub>  | 0.029646732842  | -0.005231776376 |
| F <sub>14,11,1,1</sub>   | 0.045676072876  | 0.041258411084  |
| F <sub>14,11,11,10</sub> | 0.258367075382  | 0.234190655125  |
| F <sub>14,11,11,11</sub> | 0.012868788690  | 0.042759915446  |
| F <sub>14,11,11,9</sub>  | 0.059132204641  | 0.047631044076  |
| F <sub>14,11,2,1</sub>   | 0.019183180094  | -0.000435981376 |
| F <sub>14,11,2,2</sub>   | -0.471788706239 | -0.484023964912 |
| F <sub>14,11,3,1</sub>   | 0.024850937828  | -0.014823366436 |
| F <sub>14,11,3,2</sub>   | 0.232378067717  | 0.205347223045  |
| F <sub>14,11,3,3</sub>   | -0.022818103014 | 0.039213808765  |
| F <sub>14,11,4,1</sub>   | 0.012207478259  | 0.013515422338  |
| F <sub>14,11,4,2</sub>   | 0.034006546474  | 0.130358428212  |
| F <sub>14,11,4,3</sub>   | -0.017875235976 | -0.074116832094 |

|                          |                 |                 |
|--------------------------|-----------------|-----------------|
| F <sub>14,11,4,4</sub>   | 0.049825412764  | 0.022616449282  |
| F <sub>14,11,5,1</sub>   | 0.077604683028  | -0.010027571393 |
| F <sub>14,11,5,2</sub>   | 0.045342061983  | 0.174828527482  |
| F <sub>14,11,5,3</sub>   | 0.022235049632  | 0.021363086909  |
| F <sub>14,11,5,4</sub>   | -0.007411683226 | -0.045342061994 |
| F <sub>14,11,5,5</sub>   | -0.158483476758 | -0.120144897112 |
| F <sub>14,11,6,1</sub>   | -0.010899534168 | -0.018311217404 |
| F <sub>14,11,6,2</sub>   | 0.069321037146  | 0.029646732845  |
| F <sub>14,11,6,3</sub>   | -0.086324310384 | -0.022235049664 |
| F <sub>14,11,6,4</sub>   | -0.072372906653 | -0.011771496973 |
| F <sub>14,11,6,5</sub>   | 0.064089260682  | 0.030954676948  |
| F <sub>14,11,6,6</sub>   | 0.022343552931  | 0.065252420100  |
| F <sub>14,11,7,1</sub>   | -0.013515422327 | -0.011771496859 |
| F <sub>14,11,7,2</sub>   | 0.096787863107  | 0.104199546309  |
| F <sub>14,11,7,3</sub>   | -0.198807502564 | -0.226274328603 |
| F <sub>14,11,7,4</sub>   | -0.100275714011 | -0.057113558863 |
| F <sub>14,11,7,5</sub>   | 0.118150949986  | 0.158697216966  |
| F <sub>14,11,7,6</sub>   | -0.058857484269 | -0.137770111434 |
| F <sub>14,11,7,7</sub>   | -0.325479373567 | -0.313359811107 |
| F <sub>14,11,8,1</sub>   | 0.110739266748  | 0.015259347790  |
| F <sub>14,11,8,2</sub>   | -0.030082714114 | -0.112483192244 |
| F <sub>14,11,8,3</sub>   | 0.091120105348  | 0.017003273239  |
| F <sub>14,11,8,4</sub>   | 0.042726173945  | 0.004795795014  |
| F <sub>14,11,8,5</sub>   | 0.005667757764  | 0.064961223425  |
| F <sub>14,11,8,6</sub>   | -0.102019639766 | 0.017439254633  |
| F <sub>14,11,8,7</sub>   | -0.068449074406 | 0.029210751473  |
| F <sub>14,11,8,8</sub>   | 0.003641455655  | -0.017493836342 |
| F <sub>14,11,9,9</sub>   | 0.057657629156  | 0.039907004927  |
| F <sub>14,12,10,10</sub> | 0.272324530989  | 0.224619941746  |
| F <sub>14,12,10,9</sub>  | -0.044034117896 | -0.034442527862 |
| F <sub>14,12,1,1</sub>   | -0.212257494935 | -0.213299880231 |
| F <sub>14,12,11,10</sub> | 0.017875235974  | -0.001743925456 |
| F <sub>14,12,11,11</sub> | -0.091865236116 | -0.084519911649 |
| F <sub>14,12,11,9</sub>  | 0.025286919182  | -0.034878509218 |
| F <sub>14,12,12,10</sub> | -0.223014482736 | -0.149821731469 |
| F <sub>14,12,12,11</sub> | -0.036688738287 | -0.035198051591 |
| F <sub>14,12,12,12</sub> | 1.027754421936  | 0.976064368261  |
| F <sub>14,12,12,9</sub>  | -0.078696037632 | -0.100137573336 |
| F <sub>14,12,2,1</sub>   | 0.112483192110  | 0.066705148896  |
| F <sub>14,12,2,2</sub>   | 2.164412232118  | 2.141901522850  |
| F <sub>14,12,3,1</sub>   | -0.081528515323 | 0.006103739150  |
| F <sub>14,12,3,2</sub>   | -0.070192999842 | -0.115099080445 |
| F <sub>14,12,3,3</sub>   | -0.092107043868 | -0.091164962013 |
| F <sub>14,12,4,1</sub>   | -0.071064962761 | -0.001307944233 |
| F <sub>14,12,4,2</sub>   | 0.102891602217  | 0.043598136527  |
| F <sub>14,12,4,3</sub>   | -0.118586931320 | -0.087632254445 |
| F <sub>14,12,4,4</sub>   | -0.540596564281 | -0.542661251124 |
| F <sub>14,12,5,1</sub>   | 0.100711695356  | 0.104199546295  |
| F <sub>14,12,5,2</sub>   | -1.213336139625 | -1.272193623943 |
| F <sub>14,12,5,3</sub>   | 0.157825254236  | 0.079348608473  |
| F <sub>14,12,5,4</sub>   | -0.673155227962 | -0.755991687403 |
| F <sub>14,12,5,5</sub>   | 0.677986384753  | 0.697690699494  |



|                          |                 |                 |
|--------------------------|-----------------|-----------------|
| F <sub>14,12,6,1</sub>   | 0.077604683176  | -0.012207477777 |
| F <sub>14,12,6,2</sub>   | 0.093300011570  | 0.166544881541  |
| F <sub>14,12,6,3</sub>   | -0.045778042874 | -0.087196272957 |
| F <sub>14,12,6,4</sub>   | 0.040546267035  | 0.023107013379  |
| F <sub>14,12,6,5</sub>   | -0.030518695570 | -0.038366360226 |
| F <sub>14,12,6,6</sub>   | 0.029125842815  | 0.052859225421  |
| F <sub>14,12,7,1</sub>   | -0.010463552686 | -0.054933652033 |
| F <sub>14,12,7,2</sub>   | 2.036904938659  | 2.006822224482  |
| F <sub>14,12,7,3</sub>   | -0.108559359986 | -0.150413571057 |
| F <sub>14,12,7,4</sub>   | 0.997525363738  | 0.974854332874  |
| F <sub>14,12,7,5</sub>   | -2.008566149945 | -1.942732963774 |
| F <sub>14,12,7,6</sub>   | 0.153901421622  | 0.113791136336  |
| F <sub>14,12,7,7</sub>   | 2.818745092137  | 2.800383722331  |
| F <sub>14,12,8,1</sub>   | -0.037058415662 | -0.020927105515 |
| F <sub>14,12,8,2</sub>   | -0.003487851758 | -0.114227117704 |
| F <sub>14,12,8,3</sub>   | -0.027466826006 | -0.002179906827 |
| F <sub>14,12,8,4</sub>   | 0.121638799450  | 0.128614502792  |
| F <sub>14,12,8,5</sub>   | 0.093735993437  | -0.017003273249 |
| F <sub>14,12,8,6</sub>   | -0.007847661871 | -0.095479919101 |
| F <sub>14,12,8,7</sub>   | 0.239789751515  | 0.162621049239  |
| F <sub>14,12,8,8</sub>   | -0.099563828149 | -0.094231866017 |
| F <sub>14,12,9,9</sub>   | -0.278232737130 | -0.243449651953 |
| F <sub>14,13,10,10</sub> | 0.051835534213  | -0.014751120482 |
| F <sub>14,13,10,9</sub>  | 0.111175248156  | 0.057549540225  |
| F <sub>14,13,1,1</sub>   | 0.092537583455  | 0.042016102079  |
| F <sub>14,13,11,10</sub> | 0.071936925272  | 0.146489738739  |
| F <sub>14,13,11,11</sub> | 0.009225622104  | 0.003095050061  |
| F <sub>14,13,11,9</sub>  | -0.029646732844 | -0.019619161437 |
| F <sub>14,13,12,10</sub> | -0.041418229701 | 0.051445801104  |
| F <sub>14,13,12,11</sub> | -0.020055142806 | -0.058421502950 |
| F <sub>14,13,12,12</sub> | 0.051428618261  | -0.011088877035 |
| F <sub>14,13,12,9</sub>  | 0.050573838374  | -0.007411683208 |
| F <sub>14,13,13,10</sub> | -0.366074501458 | -0.324853716955 |
| F <sub>14,13,13,11</sub> | -0.000008172778 | 0.076994486403  |
| F <sub>14,13,13,12</sub> | -0.013679244656 | 0.019534307614  |
| F <sub>14,13,13,13</sub> | 0.208714636586  | 0.171725870675  |
| F <sub>14,13,13,9</sub>  | -0.064570241404 | -0.075083177523 |
| F <sub>14,13,2,1</sub>   | -0.103327583546 | -0.069757018454 |
| F <sub>14,13,2,2</sub>   | 0.182620353777  | 0.129392781219  |
| F <sub>14,13,3,1</sub>   | -0.153029459218 | 0.025722900538  |
| F <sub>14,13,3,2</sub>   | -0.004795794998 | 0.046214024713  |
| F <sub>14,13,3,3</sub>   | -0.002897234120 | -0.003205689312 |
| F <sub>14,13,4,1</sub>   | -0.029210751427 | -0.013079440912 |
| F <sub>14,13,4,2</sub>   | -0.108995341320 | -0.055369633389 |
| F <sub>14,13,4,3</sub>   | -0.062781316606 | -0.017003273245 |
| F <sub>14,13,4,4</sub>   | 0.179854127170  | 0.133421850425  |
| F <sub>14,13,5,1</sub>   | 0.053625707940  | -0.024850937814 |
| F <sub>14,13,5,2</sub>   | -0.061909353867 | -0.070628981179 |
| F <sub>14,13,5,3</sub>   | -0.038366360146 | 0.031390658308  |
| F <sub>14,13,5,4</sub>   | 0.012207478216  | 0.102019639476  |
| F <sub>14,13,5,5</sub>   | 0.159107427902  | 0.112133932674  |
| F <sub>14,13,6,1</sub>   | 0.045342061961  | 0.023978974938  |

|                          |                 |                 |
|--------------------------|-----------------|-----------------|
| F <sub>14,13,6,2</sub>   | -0.143437869075 | -0.221914514942 |
| F <sub>14,13,6,3</sub>   | 0.120330856692  | 0.043598136500  |
| F <sub>14,13,6,4</sub>   | -0.046214024780 | 0.043162154955  |
| F <sub>14,13,6,5</sub>   | -0.078912627120 | -0.074116832078 |
| F <sub>14,13,6,6</sub>   | 0.255744952523  | 0.184837583996  |
| F <sub>14,13,7,1</sub>   | 0.079784589829  | 0.017875235975  |
| F <sub>14,13,7,2</sub>   | 0.206655167159  | 0.152157496492  |
| F <sub>14,13,7,3</sub>   | -0.228890216777 | -0.158697216963 |
| F <sub>14,13,7,4</sub>   | -0.162621049238 | -0.091992068097 |
| F <sub>14,13,7,5</sub>   | -0.054497670661 | -0.087632254424 |
| F <sub>14,13,7,6</sub>   | 0.198807502654  | 0.143873850553  |
| F <sub>14,13,7,7</sub>   | 0.101076804621  | 0.079961514807  |
| F <sub>14,13,8,1</sub>   | -0.031826639758 | -0.010899534133 |
| F <sub>14,13,8,2</sub>   | 0.022235049815  | 0.050573838376  |
| F <sub>14,13,8,3</sub>   | 0.120330856817  | -0.002615888189 |
| F <sub>14,13,8,4</sub>   | -0.108123378264 | -0.037494397423 |
| F <sub>14,13,8,5</sub>   | -0.014823366394 | -0.030082714203 |
| F <sub>14,13,8,6</sub>   | -0.085888329641 | -0.051445801081 |
| F <sub>14,13,8,7</sub>   | 0.017003273100  | 0.035750471956  |
| F <sub>14,13,8,8</sub>   | 0.128257987527  | 0.085854780058  |
| F <sub>14,13,9,9</sub>   | 0.052358711854  | 0.038147951818  |
| F <sub>14,14,10,10</sub> | 0.768999827622  | 0.755302184565  |
| F <sub>14,14,10,9</sub>  | -0.376465829798 | -0.343757419296 |
| F <sub>14,14,1,1</sub>   | -0.304952608389 | -0.325463415017 |
| F <sub>14,14,11,10</sub> | 0.106350291665  | 0.135372039059  |
| F <sub>14,14,11,11</sub> | -0.130806781602 | -0.108029428523 |
| F <sub>14,14,11,9</sub>  | 0.023579401261  | -0.002571585586 |
| F <sub>14,14,12,10</sub> | -0.356713324809 | -0.391403259122 |
| F <sub>14,14,12,11</sub> | -0.005416163265 | -0.034374766773 |
| F <sub>14,14,12,12</sub> | 0.909476550072  | 0.924923436456  |
| F <sub>14,14,12,9</sub>  | -0.110277604688 | -0.091559449920 |
| F <sub>14,14,13,10</sub> | 0.037864819643  | 0.017536084307  |
| F <sub>14,14,13,11</sub> | -0.083125667453 | -0.074618965673 |
| F <sub>14,14,13,12</sub> | -0.014745460910 | -0.056827769796 |
| F <sub>14,14,13,13</sub> | 0.047009110527  | 0.033101753951  |
| F <sub>14,14,13,9</sub>  | 0.022606521540  | -0.025026411845 |
| F <sub>14,14,14,10</sub> | -0.903448786424 | -0.825703017367 |
| F <sub>14,14,14,11</sub> | -0.132950209481 | -0.114461672308 |
| F <sub>14,14,14,12</sub> | 0.578224097432  | 0.546924556614  |
| F <sub>14,14,14,13</sub> | -0.019068858236 | -0.000520305674 |
| F <sub>14,14,14,14</sub> | 0.549720584578  | 0.560748925612  |
| F <sub>14,14,14,9</sub>  | 0.085668721469  | 0.030074422096  |
| F <sub>14,14,2,1</sub>   | 0.316560047275  | 0.328242794865  |
| F <sub>14,14,2,2</sub>   | 1.466716687212  | 1.469417625469  |
| F <sub>14,14,3,1</sub>   | 0.004454978282  | -0.010969488876 |
| F <sub>14,14,3,2</sub>   | 0.150307461531  | 0.104063631936  |
| F <sub>14,14,3,3</sub>   | -0.164936678102 | -0.145688733661 |
| F <sub>14,14,4,1</sub>   | 0.012686652336  | 0.004105680406  |
| F <sub>14,14,4,2</sub>   | 0.534366276735  | 0.523121351292  |
| F <sub>14,14,4,3</sub>   | -0.051294395747 | -0.071980791183 |
| F <sub>14,14,4,4</sub>   | -0.309658560908 | -0.311678552310 |
| F <sub>14,14,5,1</sub>   | -0.042218410216 | -0.034948948130 |

|                        |                 |                 |
|------------------------|-----------------|-----------------|
| F <sub>14,14,5,2</sub> | -0.304655632957 | -0.345304786146 |
| F <sub>14,14,5,3</sub> | 0.041464316217  | 0.030006457031  |
| F <sub>14,14,5,4</sub> | 0.057253031051  | 0.061917349685  |
| F <sub>14,14,5,5</sub> | -0.462400365247 | -0.447430659978 |
| F <sub>14,14,6,1</sub> | -0.025813357900 | 0.032904723011  |
| F <sub>14,14,6,2</sub> | 0.035888805993  | 0.056078583144  |
| F <sub>14,14,6,3</sub> | -0.102643500251 | -0.058116043702 |
| F <sub>14,14,6,4</sub> | -0.132109243539 | -0.079350781377 |
| F <sub>14,14,6,5</sub> | 0.000159003978  | -0.018792511184 |
| F <sub>14,14,6,6</sub> | 0.068862107682  | 0.076875391234  |
| F <sub>14,14,7,1</sub> | -0.148046402123 | -0.105183219506 |
| F <sub>14,14,7,2</sub> | -0.036527363413 | 0.007894392199  |
| F <sub>14,14,7,3</sub> | -0.186085155460 | -0.152384252927 |
| F <sub>14,14,7,4</sub> | 0.716911632512  | 0.725416113282  |
| F <sub>14,14,7,5</sub> | -0.283574866679 | -0.254914566890 |
| F <sub>14,14,7,6</sub> | -0.032246354885 | -0.052505402076 |
| F <sub>14,14,7,7</sub> | 2.121011304991  | 2.139969382045  |
| F <sub>14,14,8,1</sub> | 0.032861371835  | 0.016329177712  |
| F <sub>14,14,8,2</sub> | -0.062681925464 | -0.094410924585 |
| F <sub>14,14,8,3</sub> | 0.045667034045  | 0.008593705156  |
| F <sub>14,14,8,4</sub> | -0.112442575037 | -0.087261859489 |
| F <sub>14,14,8,5</sub> | -0.137978197884 | -0.117759247449 |
| F <sub>14,14,8,6</sub> | 0.009262142750  | -0.004212796952 |
| F <sub>14,14,8,7</sub> | 0.112481703685  | 0.141220178741  |
| F <sub>14,14,8,8</sub> | 0.035970694961  | 0.038985889798  |
| F <sub>14,14,9,9</sub> | -0.259601865408 | -0.258708036850 |
| F <sub>14,9,1,1</sub>  | -0.349474334636 | -0.350675035824 |
| F <sub>14,9,2,1</sub>  | -0.243277601854 | -0.202731334866 |
| F <sub>14,9,2,2</sub>  | 0.947525125654  | 0.950293358261  |
| F <sub>14,9,3,1</sub>  | -0.048393931563 | 0.000871962747  |
| F <sub>14,9,3,2</sub>  | -0.005667757738 | -0.032698602407 |
| F <sub>14,9,3,3</sub>  | 0.037496711741  | 0.034311543719  |
| F <sub>14,9,4,1</sub>  | 0.089812161200  | 0.025286919153  |
| F <sub>14,9,4,2</sub>  | -0.056677577492 | 0.001743925464  |
| F <sub>14,9,4,3</sub>  | -0.016131310509 | -0.003923832293 |
| F <sub>14,9,4,4</sub>  | 0.077186049775  | 0.074902912059  |
| F <sub>14,9,5,1</sub>  | -0.050573838378 | -0.044470099266 |
| F <sub>14,9,5,2</sub>  | -0.006975701836 | 0.059729447052  |
| F <sub>14,9,5,3</sub>  | -0.033134583763 | -0.000871962732 |
| F <sub>14,9,5,4</sub>  | 0.058857484328  | 0.093735993549  |
| F <sub>14,9,5,5</sub>  | 0.049343377638  | 0.054096077302  |
| F <sub>14,9,6,1</sub>  | -0.066269167479 | -0.054061689234 |
| F <sub>14,9,6,2</sub>  | 0.108123378509  | 0.114663099067  |
| F <sub>14,9,6,3</sub>  | 0.061909353992  | -0.002615888167 |
| F <sub>14,9,6,4</sub>  | 0.022235049620  | -0.010899533921 |
| F <sub>14,9,6,5</sub>  | -0.019183180068 | 0.021799068257  |
| F <sub>14,9,6,6</sub>  | -0.095161894215 | -0.061423950890 |
| F <sub>14,9,7,1</sub>  | 0.263768726020  | 0.343553315854  |
| F <sub>14,9,7,2</sub>  | -0.532333247029 | -0.600346340023 |
| F <sub>14,9,7,3</sub>  | -0.052317763837 | 0.025722900546  |
| F <sub>14,9,7,4</sub>  | 0.024414956440  | -0.010027571380 |
| F <sub>14,9,7,5</sub>  | -0.144309831912 | -0.119022912724 |

|                          |                 |                 |
|--------------------------|-----------------|-----------------|
| F <sub>14,9,7,6</sub>    | -0.004795795091 | -0.025722900577 |
| F <sub>14,9,7,7</sub>    | 0.182182389602  | 0.168172856483  |
| F <sub>14,9,8,1</sub>    | -0.060601409702 | 0.030954676942  |
| F <sub>14,9,8,2</sub>    | -0.113791136504 | -0.051445801102 |
| F <sub>14,9,8,3</sub>    | -0.104199546309 | -0.022671030995 |
| F <sub>14,9,8,4</sub>    | 0.054061689070  | 0.018311217349  |
| F <sub>14,9,8,5</sub>    | -0.020055142822 | -0.018311217349 |
| F <sub>14,9,8,6</sub>    | 0.004359814027  | 0.014823366390  |
| F <sub>14,9,8,7</sub>    | 0.005231776491  | -0.006103739122 |
| F <sub>14,9,8,8</sub>    | -0.039115737752 | -0.047532682375 |
| F <sub>14,9,9,9</sub>    | -0.480302164660 | -0.439712267431 |
| F <sub>15,10,10,10</sub> | 0.460303045171  | 0.454048099628  |
| F <sub>15,10,10,9</sub>  | 0.161427371132  | 0.143652645825  |
| F <sub>15,10,1,1</sub>   | -0.027289580066 | 0.008894699204  |
| F <sub>15,10,2,1</sub>   | 0.168288807024  | 0.196191614385  |
| F <sub>15,10,2,2</sub>   | -0.438675582824 | -0.432799525360 |
| F <sub>15,10,3,1</sub>   | 0.030082714207  | -0.038366360144 |
| F <sub>15,10,3,2</sub>   | 0.074552813470  | 0.132102353698  |
| F <sub>15,10,3,3</sub>   | 0.044512040642  | 0.071074662191  |
| F <sub>15,10,4,1</sub>   | 0.021363086907  | -0.031390658299 |
| F <sub>15,10,4,2</sub>   | -0.302571067515 | -0.266384614197 |
| F <sub>15,10,4,3</sub>   | -0.027902807376 | 0.054497670661  |
| F <sub>15,10,4,4</sub>   | 0.258714195578  | 0.304279591125  |
| F <sub>15,10,5,1</sub>   | -0.019619161432 | -0.029210751471 |
| F <sub>15,10,5,2</sub>   | 0.019183180068  | 0.040110285604  |
| F <sub>15,10,5,3</sub>   | 0.029210751478  | 0.097223844458  |
| F <sub>15,10,5,4</sub>   | 0.201423390771  | 0.202295353495  |
| F <sub>15,10,5,5</sub>   | -0.055432928867 | -0.055750813580 |
| F <sub>15,10,6,1</sub>   | -0.045778043365 | 0.017003273230  |
| F <sub>15,10,6,2</sub>   | -0.090248142615 | -0.149105626926 |
| F <sub>15,10,6,3</sub>   | 0.079784589842  | 0.168724788363  |
| F <sub>15,10,6,4</sub>   | 0.075424776185  | -0.006103739139 |
| F <sub>15,10,6,5</sub>   | -0.099403751290 | -0.131666372317 |
| F <sub>15,10,6,6</sub>   | -0.178109064769 | -0.131581503441 |
| F <sub>15,10,7,1</sub>   | 0.017875235971  | 0.064961223426  |
| F <sub>15,10,7,2</sub>   | -0.241969657750 | -0.169596751096 |
| F <sub>15,10,7,3</sub>   | -0.041418229709 | -0.008719627307 |
| F <sub>15,10,7,4</sub>   | 0.256357042797  | 0.224966384495  |
| F <sub>15,10,7,5</sub>   | 0.248945359585  | 0.202731334866  |
| F <sub>15,10,7,6</sub>   | 0.049265894290  | 0.136026185972  |
| F <sub>15,10,7,7</sub>   | -0.499592703242 | -0.501233565864 |
| F <sub>15,10,8,1</sub>   | 0.044906080611  | 0.071936925281  |
| F <sub>15,10,8,2</sub>   | 0.293851440219  | 0.279028073798  |
| F <sub>15,10,8,3</sub>   | -0.026594863280 | -0.096787863088 |
| F <sub>15,10,8,4</sub>   | -0.116843005876 | -0.080220571217 |
| F <sub>15,10,8,5</sub>   | 0.010899534138  | 0.011335515499  |
| F <sub>15,10,8,6</sub>   | 0.015695329087  | 0.030518695576  |
| F <sub>15,10,8,7</sub>   | -0.211450962187 | -0.223658440397 |
| F <sub>15,10,8,8</sub>   | -0.026447685028 | -0.037890611441 |
| F <sub>15,10,9,9</sub>   | -0.121981229459 | -0.077177128966 |
| F <sub>15,11,10,10</sub> | 0.163192822579  | 0.213553263086  |
| F <sub>15,11,10,9</sub>  | -0.124254689107 | -0.039674304251 |

|                          |                 |                 |
|--------------------------|-----------------|-----------------|
| F <sub>15,11,1,1</sub>   | -0.036870905666 | -0.011985486886 |
| F <sub>15,11,11,10</sub> | 0.061770383311  | 0.101400838263  |
| F <sub>15,11,11,11</sub> | -0.122186395491 | -0.100566481456 |
| F <sub>15,11,11,9</sub>  | 0.044875019471  | 0.024426275125  |
| F <sub>15,11,2,1</sub>   | 0.034006546498  | -0.029646732839 |
| F <sub>15,11,2,2</sub>   | -0.024182344527 | 0.010204461222  |
| F <sub>15,11,3,1</sub>   | 0.076296738928  | 0.014823366421  |
| F <sub>15,11,3,2</sub>   | 0.090248142610  | 0.062345335251  |
| F <sub>15,11,3,3</sub>   | -0.089308940205 | -0.059973504729 |
| F <sub>15,11,4,1</sub>   | -0.011771496864 | -0.021799068271 |
| F <sub>15,11,4,2</sub>   | 0.131230390957  | 0.076732720292  |
| F <sub>15,11,4,3</sub>   | -0.017003273252 | -0.001743925475 |
| F <sub>15,11,4,4</sub>   | -0.104402915758 | -0.032371374181 |
| F <sub>15,11,5,1</sub>   | 0.008283645942  | -0.040546266981 |
| F <sub>15,11,5,2</sub>   | 0.174392546123  | 0.268128539652  |
| F <sub>15,11,5,3</sub>   | 0.002179906821  | 0.108123378603  |
| F <sub>15,11,5,4</sub>   | -0.105071509039 | -0.011771496865 |
| F <sub>15,11,5,5</sub>   | -0.097427213923 | -0.038805857773 |
| F <sub>15,11,6,1</sub>   | 0.032262621025  | -0.015259347783 |
| F <sub>15,11,6,2</sub>   | 0.066705148877  | 0.108559359977  |
| F <sub>15,11,6,3</sub>   | -0.034442527848 | -0.046214024716 |
| F <sub>15,11,6,4</sub>   | -0.017439254623 | 0.009591590070  |
| F <sub>15,11,6,5</sub>   | 0.180496285237  | 0.143001887826  |
| F <sub>15,11,6,6</sub>   | 0.077686956535  | 0.111171731866  |
| F <sub>15,11,7,1</sub>   | 0.006103739115  | -0.003487850931 |
| F <sub>15,11,7,2</sub>   | -0.158261235610 | -0.224530403130 |
| F <sub>15,11,7,3</sub>   | 0.042290192437  | -0.081528515308 |
| F <sub>15,11,7,4</sub>   | -0.070628981181 | 0.001307944100  |
| F <sub>15,11,7,5</sub>   | 0.139950018264  | 0.156517310143  |
| F <sub>15,11,7,6</sub>   | -0.051009819745 | -0.068885055703 |
| F <sub>15,11,7,7</sub>   | -0.258469709943 | -0.203396340105 |
| F <sub>15,11,8,1</sub>   | 0.036186453319  | 0.029646732837  |
| F <sub>15,11,8,2</sub>   | -0.222786477686 | -0.141693943721 |
| F <sub>15,11,8,3</sub>   | -0.000435981369 | 0.057985521588  |
| F <sub>15,11,8,4</sub>   | -0.028774770153 | 0.046214024727  |
| F <sub>15,11,8,5</sub>   | -0.015695329152 | 0.040982248336  |
| F <sub>15,11,8,6</sub>   | -0.000435981277 | -0.034878509236 |
| F <sub>15,11,8,7</sub>   | 0.093735993549  | 0.002615888198  |
| F <sub>15,11,8,8</sub>   | -0.090872459566 | -0.036340307984 |
| F <sub>15,11,9,9</sub>   | -0.067237861698 | -0.018563215795 |
| F <sub>15,12,10,10</sub> | 0.094436670126  | 0.145473436079  |
| F <sub>15,12,10,9</sub>  | 0.020491124168  | 0.024414956452  |
| F <sub>15,12,1,1</sub>   | -0.070733933936 | -0.021477150384 |
| F <sub>15,12,11,10</sub> | 0.140385999624  | 0.051881782466  |
| F <sub>15,12,11,11</sub> | 0.033166755583  | 0.105537543022  |
| F <sub>15,12,11,9</sub>  | -0.071936925283 | -0.053189726567 |
| F <sub>15,12,12,10</sub> | -0.201387968787 | -0.170070225202 |
| F <sub>15,12,12,11</sub> | -0.078457115496 | 0.016199031728  |
| F <sub>15,12,12,12</sub> | -0.046579347733 | -0.074350452247 |
| F <sub>15,12,12,9</sub>  | 0.011100996366  | 0.014834685096  |
| F <sub>15,12,2,1</sub>   | 0.102455620846  | 0.097223844468  |
| F <sub>15,12,2,2</sub>   | 0.031616450034  | 0.053571779806  |

|                          |                 |                 |
|--------------------------|-----------------|-----------------|
| F <sub>15,12,3,1</sub>   | -0.060165428422 | -0.040110285603 |
| F <sub>15,12,3,2</sub>   | 0.037930378777  | -0.018311217340 |
| F <sub>15,12,3,3</sub>   | 0.095059255601  | 0.092719899662  |
| F <sub>15,12,4,1</sub>   | -0.010899534144 | 0.040546266959  |
| F <sub>15,12,4,2</sub>   | 0.010027571405  | -0.095479919002 |
| F <sub>15,12,4,3</sub>   | -0.024414956452 | 0.027902807374  |
| F <sub>15,12,4,4</sub>   | -0.102304998313 | -0.072111124125 |
| F <sub>15,12,5,1</sub>   | 0.007847664573  | 0.020927105534  |
| F <sub>15,12,5,2</sub>   | -0.044470099258 | -0.064961223426 |
| F <sub>15,12,5,3</sub>   | 0.043162155160  | 0.063653279340  |
| F <sub>15,12,5,4</sub>   | 0.081528515314  | 0.140385999629  |
| F <sub>15,12,5,5</sub>   | 0.129576952643  | 0.173120876943  |
| F <sub>15,12,6,1</sub>   | 0.030518695585  | 0.023107012386  |
| F <sub>15,12,6,2</sub>   | -0.020055142824 | -0.017439254618 |
| F <sub>15,12,6,3</sub>   | 0.083708422155  | 0.054497670670  |
| F <sub>15,12,6,4</sub>   | -0.139078055529 | -0.059729447007 |
| F <sub>15,12,6,5</sub>   | -0.060165428415 | -0.155209366046 |
| F <sub>15,12,6,6</sub>   | -0.092382663804 | -0.080890886819 |
| F <sub>15,12,7,1</sub>   | 0.009155608675  | -0.001743925461 |
| F <sub>15,12,7,2</sub>   | -0.068885055722 | -0.071064962553 |
| F <sub>15,12,7,3</sub>   | -0.054061689303 | -0.001743925464 |
| F <sub>15,12,7,4</sub>   | -0.028774770114 | 0.028774770111  |
| F <sub>15,12,7,5</sub>   | -0.033134583764 | -0.144745813283 |
| F <sub>15,12,7,6</sub>   | 0.078476645750  | 0.094171974906  |
| F <sub>15,12,7,7</sub>   | 0.312328313928  | 0.307643678888  |
| F <sub>15,12,8,1</sub>   | -0.096787863071 | -0.034442527859 |
| F <sub>15,12,8,2</sub>   | 0.027466825982  | 0.030082714206  |
| F <sub>15,12,8,3</sub>   | 0.037058416043  | -0.051445801107 |
| F <sub>15,12,8,4</sub>   | 0.153901421901  | 0.166544881546  |
| F <sub>15,12,8,5</sub>   | -0.007847664580 | -0.082836459405 |
| F <sub>15,12,8,6</sub>   | 0.126434596033  | 0.139078055527  |
| F <sub>15,12,8,7</sub>   | 0.111611229539  | 0.153465440584  |
| F <sub>15,12,8,8</sub>   | -0.124073998878 | -0.085581444925 |
| F <sub>15,12,9,9</sub>   | -0.045542413565 | -0.032290699268 |
| F <sub>15,13,10,10</sub> | -0.097962879256 | -0.118228321414 |
| F <sub>15,13,10,9</sub>  | -0.034442527857 | 0.036622434683  |
| F <sub>15,13,1,1</sub>   | -0.003197034477 | 0.022211456469  |
| F <sub>15,13,11,10</sub> | 0.204039278959  | 0.228454235422  |
| F <sub>15,13,11,11</sub> | -0.033960814821 | -0.025974664516 |
| F <sub>15,13,11,9</sub>  | -0.028774770112 | 0.005667757750  |
| F <sub>15,13,12,10</sub> | -0.197499558480 | -0.081092533950 |
| F <sub>15,13,12,11</sub> | 0.189215912542  | 0.077604683022  |
| F <sub>15,13,12,12</sub> | -0.030356702206 | -0.106485889977 |
| F <sub>15,13,12,9</sub>  | -0.047521968822 | 0.048829912914  |
| F <sub>15,13,13,10</sub> | -0.170171703037 | -0.165594149849 |
| F <sub>15,13,13,11</sub> | 0.098841973057  | 0.123915494388  |
| F <sub>15,13,13,12</sub> | -0.100417934742 | -0.087340612991 |
| F <sub>15,13,13,13</sub> | 0.078261116874  | 0.029322698944  |
| F <sub>15,13,13,9</sub>  | 0.003195200950  | -0.051201959042 |
| F <sub>15,13,2,1</sub>   | -0.009591590027 | -0.000871962725 |
| F <sub>15,13,2,2</sub>   | -0.210122810773 | -0.226628666239 |
| F <sub>15,13,3,1</sub>   | -0.069757018445 | -0.025286919190 |

|                          |                 |                 |
|--------------------------|-----------------|-----------------|
| F <sub>15,13,3,2</sub>   | 0.136026185968  | 0.129922446855  |
| F <sub>15,13,3,3</sub>   | -0.081433138822 | -0.043576628202 |
| F <sub>15,13,4,1</sub>   | -0.074988794815 | -0.012643459586 |
| F <sub>15,13,4,2</sub>   | -0.025722900556 | -0.061037391142 |
| F <sub>15,13,4,3</sub>   | 0.050573838377  | 0.026158881925  |
| F <sub>15,13,4,4</sub>   | 0.031681474742  | 0.037425702748  |
| F <sub>15,13,5,1</sub>   | 0.041418229708  | 0.020491124174  |
| F <sub>15,13,5,2</sub>   | -0.172648620662 | -0.130794409587 |
| F <sub>15,13,5,3</sub>   | 0.148233664197  | 0.153901421955  |
| F <sub>15,13,5,4</sub>   | 0.195755633016  | 0.096351881728  |
| F <sub>15,13,5,5</sub>   | 0.056397108034  | 0.031231760572  |
| F <sub>15,13,6,1</sub>   | -0.041854211080 | -0.054497670690 |
| F <sub>15,13,6,2</sub>   | -0.022235049592 | -0.027902807383 |
| F <sub>15,13,6,3</sub>   | 0.211014980782  | 0.090684123975  |
| F <sub>15,13,6,4</sub>   | 0.127742540033  | 0.067141130172  |
| F <sub>15,13,6,5</sub>   | -0.085016366234 | -0.091992068074 |
| F <sub>15,13,6,6</sub>   | 0.069867428818  | 0.048731150607  |
| F <sub>15,13,7,1</sub>   | -0.075860757573 | -0.014823366415 |
| F <sub>15,13,7,2</sub>   | 0.034442527859  | 0.076296738934  |
| F <sub>15,13,7,3</sub>   | -0.108123378593 | -0.097223844466 |
| F <sub>15,13,7,4</sub>   | -0.074552813465 | 0.021799068260  |
| F <sub>15,13,7,5</sub>   | -0.087196273061 | -0.096787863096 |
| F <sub>15,13,7,6</sub>   | 0.027466826045  | 0.040110285610  |
| F <sub>15,13,7,7</sub>   | 0.071551218903  | 0.072544753424  |
| F <sub>15,13,8,1</sub>   | 0.071064962512  | 0.002615888195  |
| F <sub>15,13,8,2</sub>   | 0.111175248213  | 0.132974316416  |
| F <sub>15,13,8,3</sub>   | 0.070192999815  | -0.040546266971 |
| F <sub>15,13,8,4</sub>   | 0.018747198810  | -0.037058416053 |
| F <sub>15,13,8,5</sub>   | 0.066705148900  | 0.005231776384  |
| F <sub>15,13,8,6</sub>   | -0.074552813672 | -0.062781316593 |
| F <sub>15,13,8,7</sub>   | 0.026158881883  | 0.082400478042  |
| F <sub>15,13,8,8</sub>   | 0.053931558157  | 0.065027833309  |
| F <sub>15,13,9,9</sub>   | 0.018356949010  | 0.030295997033  |
| F <sub>15,14,10,10</sub> | 0.351792280260  | 0.293419141329  |
| F <sub>15,14,10,9</sub>  | -0.066705148896 | -0.046214024723 |
| F <sub>15,14,1,1</sub>   | -0.038137986993 | -0.038505564580 |
| F <sub>15,14,11,10</sub> | -0.012207478226 | -0.030082714209 |
| F <sub>15,14,11,11</sub> | 0.034979154818  | 0.028284340381  |
| F <sub>15,14,11,9</sub>  | 0.022235049633  | -0.002615888197 |
| F <sub>15,14,12,10</sub> | -0.184856098888 | -0.153465440588 |
| F <sub>15,14,12,11</sub> | -0.102455620845 | -0.012643459595 |
| F <sub>15,14,12,12</sub> | -0.057216371230 | -0.069724270539 |
| F <sub>15,14,12,9</sub>  | 0.038802341513  | 0.000435981367  |
| F <sub>15,14,13,10</sub> | 0.069321037082  | 0.012207478232  |
| F <sub>15,14,13,11</sub> | 0.082836459420  | 0.000871962732  |
| F <sub>15,14,13,12</sub> | -0.023542993725 | -0.021799068266 |
| F <sub>15,14,13,13</sub> | -0.050880108725 | -0.029497723238 |
| F <sub>15,14,13,9</sub>  | -0.051445801105 | 0.004359813657  |
| F <sub>15,14,14,10</sub> | -0.136630203331 | -0.092291149637 |
| F <sub>15,14,14,11</sub> | -0.009862714026 | 0.019570620956  |
| F <sub>15,14,14,12</sub> | -0.096930083820 | -0.057577618453 |
| F <sub>15,14,14,13</sub> | 0.000510778460  | 0.018146649643  |

|                          |                 |                 |
|--------------------------|-----------------|-----------------|
| F <sub>15,14,14,14</sub> | -0.020073161432 | -0.012773358733 |
| F <sub>15,14,14,9</sub>  | -0.136028181702 | -0.052248314317 |
| F <sub>15,14,2,1</sub>   | 0.037930378779  | 0.078476645754  |
| F <sub>15,14,2,2</sub>   | 0.058679943810  | 0.089642889130  |
| F <sub>15,14,3,1</sub>   | -0.085016366231 | -0.015695329142 |
| F <sub>15,14,3,2</sub>   | -0.098531788569 | -0.087632254432 |
| F <sub>15,14,3,3</sub>   | -0.028937276784 | -0.002243942026 |
| F <sub>15,14,4,1</sub>   | 0.065833186144  | 0.032262621025  |
| F <sub>15,14,4,2</sub>   | -0.043162155157 | -0.024414956459 |
| F <sub>15,14,4,3</sub>   | 0.032262621035  | 0.016131310510  |
| F <sub>15,14,4,4</sub>   | -0.038739340600 | -0.036581233057 |
| F <sub>15,14,5,1</sub>   | 0.000000000000  | 0.007847664569  |
| F <sub>15,14,5,2</sub>   | -0.017003273246 | -0.064089260699 |
| F <sub>15,14,5,3</sub>   | 0.064961223426  | 0.013079440954  |
| F <sub>15,14,5,4</sub>   | 0.204039278967  | 0.171340676564  |
| F <sub>15,14,5,5</sub>   | 0.262117869099  | 0.236733981480  |
| F <sub>15,14,6,1</sub>   | 0.088504217171  | -0.005667757721 |
| F <sub>15,14,6,2</sub>   | 0.001743925414  | 0.062345335244  |
| F <sub>15,14,6,3</sub>   | -0.008719627293 | -0.012643459582 |
| F <sub>15,14,6,4</sub>   | 0.002615888189  | -0.021799068203 |
| F <sub>15,14,6,5</sub>   | -0.165672918817 | -0.050573838380 |
| F <sub>15,14,6,6</sub>   | -0.022021710331 | -0.047225191953 |
| F <sub>15,14,7,1</sub>   | 0.020491124181  | 0.033570565127  |
| F <sub>15,14,7,2</sub>   | -0.187907968449 | -0.163928993350 |
| F <sub>15,14,7,3</sub>   | 0.059293465680  | 0.004795795016  |
| F <sub>15,14,7,4</sub>   | -0.238481806823 | -0.182240210691 |
| F <sub>15,14,7,5</sub>   | -0.081964496682 | -0.123818707746 |
| F <sub>15,14,7,6</sub>   | 0.017003273229  | 0.048393931550  |
| F <sub>15,14,7,7</sub>   | 0.139622139335  | 0.144606608806  |
| F <sub>15,14,8,1</sub>   | 0.007411683237  | -0.020927105534 |
| F <sub>15,14,8,2</sub>   | -0.085888329029 | -0.026594863282 |
| F <sub>15,14,8,3</sub>   | -0.006975701848 | -0.016567291882 |
| F <sub>15,14,8,4</sub>   | 0.139078055420  | 0.073680850737  |
| F <sub>15,14,8,5</sub>   | -0.151721515131 | -0.121638800918 |
| F <sub>15,14,8,6</sub>   | 0.051881782702  | 0.036186453314  |
| F <sub>15,14,8,7</sub>   | 0.150849552436  | 0.177008434308  |
| F <sub>15,14,8,8</sub>   | -0.094184143143 | -0.073744885987 |
| F <sub>15,14,9,9</sub>   | -0.037626275220 | -0.068387261028 |
| F <sub>15,15,10,10</sub> | 0.569778548753  | 0.581728107979  |
| F <sub>15,15,10,9</sub>  | -0.111912337349 | -0.125534213264 |
| F <sub>15,15,1,1</sub>   | -0.104389748179 | -0.061861070114 |
| F <sub>15,15,11,10</sub> | -0.083214405979 | -0.091803317688 |
| F <sub>15,15,11,11</sub> | 0.029569791770  | 0.063146202223  |
| F <sub>15,15,11,9</sub>  | -0.008276303838 | -0.012860745804 |
| F <sub>15,15,12,10</sub> | 0.025962052290  | 0.030975487576  |
| F <sub>15,15,12,11</sub> | 0.071432818756  | 0.014745800401  |
| F <sub>15,15,12,12</sub> | -0.084569463193 | -0.052356686011 |
| F <sub>15,15,12,9</sub>  | -0.047031241222 | -0.045287294313 |
| F <sub>15,15,13,10</sub> | 0.109423894422  | 0.097175347182  |
| F <sub>15,15,13,11</sub> | 0.047494349573  | -0.038926624571 |
| F <sub>15,15,13,12</sub> | 0.222021485857  | 0.161802352141  |
| F <sub>15,15,13,13</sub> | -0.019941139661 | -0.028300638195 |



|                          |                 |                 |
|--------------------------|-----------------|-----------------|
| F <sub>15,15,13,9</sub>  | 0.020106895050  | 0.018978640628  |
| F <sub>15,15,14,10</sub> | -0.067514462462 | -0.076111815320 |
| F <sub>15,15,14,11</sub> | 0.031091831297  | 0.046592052517  |
| F <sub>15,15,14,12</sub> | -0.116977762789 | -0.107365335153 |
| F <sub>15,15,14,13</sub> | 0.150018537641  | 0.095348706952  |
| F <sub>15,15,14,14</sub> | -0.030201342994 | -0.023433875593 |
| F <sub>15,15,14,9</sub>  | -0.039806499870 | -0.045262052152 |
| F <sub>15,15,15,10</sub> | -0.032221749515 | -0.041159657295 |
| F <sub>15,15,15,11</sub> | -0.039819454482 | 0.000312899045  |
| F <sub>15,15,15,12</sub> | -0.110366775178 | -0.111978997776 |
| F <sub>15,15,15,13</sub> | 0.040967941634  | 0.060780431306  |
| F <sub>15,15,15,14</sub> | -0.156367643635 | -0.108756333160 |
| F <sub>15,15,15,15</sub> | -0.207764817248 | -0.170235165466 |
| F <sub>15,15,15,9</sub>  | -0.033740553036 | -0.049085149138 |
| F <sub>15,15,2,1</sub>   | 0.069928743131  | 0.074769936520  |
| F <sub>15,15,2,2</sub>   | 0.189069094930  | 0.205600314179  |
| F <sub>15,15,3,1</sub>   | 0.024711343629  | 0.016396725759  |
| F <sub>15,15,3,2</sub>   | -0.193581225219 | -0.165439925876 |
| F <sub>15,15,3,3</sub>   | -0.001111900269 | 0.020207519452  |
| F <sub>15,15,4,1</sub>   | 0.050113975134  | 0.072789514563  |
| F <sub>15,15,4,2</sub>   | -0.195667753042 | -0.199802826493 |
| F <sub>15,15,4,3</sub>   | 0.038584838704  | 0.056264805279  |
| F <sub>15,15,4,4</sub>   | 0.050790334200  | 0.025557216809  |
| F <sub>15,15,5,1</sub>   | 0.024587349848  | 0.024948184012  |
| F <sub>15,15,5,2</sub>   | -0.064664660122 | -0.083850115030 |
| F <sub>15,15,5,3</sub>   | 0.030464170884  | 0.009012277458  |
| F <sub>15,15,5,4</sub>   | 0.178455850494  | 0.223968269323  |
| F <sub>15,15,5,5</sub>   | 0.256695817865  | 0.317312036996  |
| F <sub>15,15,6,1</sub>   | 0.018790886358  | -0.015925192418 |
| F <sub>15,15,6,2</sub>   | 0.134823046233  | 0.121341639874  |
| F <sub>15,15,6,3</sub>   | -0.099088571748 | -0.055902602225 |
| F <sub>15,15,6,4</sub>   | 0.011228019239  | 0.006436953610  |
| F <sub>15,15,6,5</sub>   | 0.026183739936  | 0.037616770731  |
| F <sub>15,15,6,6</sub>   | -0.041493354776 | -0.033055376969 |
| F <sub>15,15,7,1</sub>   | 0.043315880206  | 0.025141671319  |
| F <sub>15,15,7,2</sub>   | -0.132644485665 | -0.142016123349 |
| F <sub>15,15,7,3</sub>   | -0.025778160745 | 0.028313254376  |
| F <sub>15,15,7,4</sub>   | -0.118629884575 | -0.113680328599 |
| F <sub>15,15,7,5</sub>   | -0.123670316478 | -0.158730370504 |
| F <sub>15,15,7,6</sub>   | 0.110487233154  | 0.089289148658  |
| F <sub>15,15,7,7</sub>   | -0.019587956348 | 0.007020323927  |
| F <sub>15,15,8,1</sub>   | -0.059097158955 | -0.030488513468 |
| F <sub>15,15,8,2</sub>   | 0.072472300831  | 0.082060917269  |
| F <sub>15,15,8,3</sub>   | -0.096395813548 | -0.069748792574 |
| F <sub>15,15,8,4</sub>   | 0.146932810463  | 0.084850169056  |
| F <sub>15,15,8,5</sub>   | -0.068757771288 | -0.128356948317 |
| F <sub>15,15,8,6</sub>   | 0.020195204575  | 0.023958305383  |
| F <sub>15,15,8,7</sub>   | 0.094707076218  | 0.120628443398  |
| F <sub>15,15,8,8</sub>   | -0.209476541212 | -0.128295511656 |
| F <sub>15,15,9,9</sub>   | -0.125851957706 | -0.099647193756 |
| F <sub>15,9,1,1</sub>    | 0.056515789950  | 0.008938948101  |
| F <sub>15,9,2,1</sub>    | 0.037058416056  | -0.040546266968 |

|                       |                 |                 |
|-----------------------|-----------------|-----------------|
| F <sub>15,9,2,2</sub> | 0.271018621675  | 0.293258933633  |
| F <sub>15,9,3,1</sub> | -0.054497670659 | -0.015695329148 |
| F <sub>15,9,3,2</sub> | 0.016567291875  | -0.044470099257 |
| F <sub>15,9,3,3</sub> | 0.073834773842  | 0.024393735822  |
| F <sub>15,9,4,1</sub> | -0.057985521589 | -0.048393931544 |
| F <sub>15,9,4,2</sub> | 0.048829912911  | 0.099403751283  |
| F <sub>15,9,4,3</sub> | 0.017003273253  | 0.004795795032  |
| F <sub>15,9,4,4</sub> | 0.059402287260  | 0.047666120402  |
| F <sub>15,9,5,1</sub> | 0.000871962732  | -0.022671031003 |
| F <sub>15,9,5,2</sub> | 0.051881782464  | 0.064089260707  |
| F <sub>15,9,5,3</sub> | 0.000871962739  | -0.025286919187 |
| F <sub>15,9,5,4</sub> | -0.034878509222 | 0.035750471952  |
| F <sub>15,9,5,5</sub> | 0.045450883565  | 0.044839758458  |
| F <sub>15,9,6,1</sub> | -0.005667757737 | 0.005667757752  |
| F <sub>15,9,6,2</sub> | 0.060165428408  | 0.042726173797  |
| F <sub>15,9,6,3</sub> | -0.010463552769 | -0.010899534135 |
| F <sub>15,9,6,4</sub> | -0.087632254427 | -0.000871962702 |
| F <sub>15,9,6,5</sub> | 0.037494397405  | -0.012643459600 |
| F <sub>15,9,6,6</sub> | -0.040482546918 | -0.044160575447 |
| F <sub>15,9,7,1</sub> | 0.048393931556  | 0.034442527870  |
| F <sub>15,9,7,2</sub> | -0.032262621032 | -0.061909353868 |
| F <sub>15,9,7,3</sub> | 0.051445801094  | 0.000871962715  |
| F <sub>15,9,7,4</sub> | 0.125126651843  | -0.008719627309 |
| F <sub>15,9,7,5</sub> | 0.054497670661  | -0.010027571400 |
| F <sub>15,9,7,6</sub> | -0.059293465693 | -0.027466826010 |
| F <sub>15,9,7,7</sub> | -0.030139264865 | -0.006094892090 |
| F <sub>15,9,8,1</sub> | 0.098531788562  | 0.056241596127  |
| F <sub>15,9,8,2</sub> | -0.187471987088 | -0.137334130075 |
| F <sub>15,9,8,3</sub> | 0.064525242055  | -0.001307944093 |
| F <sub>15,9,8,4</sub> | -0.033570565149 | 0.001743925460  |
| F <sub>15,9,8,5</sub> | -0.116843005902 | -0.052317763835 |
| F <sub>15,9,8,6</sub> | 0.098095807225  | -0.005667757749 |
| F <sub>15,9,8,7</sub> | 0.006103739123  | -0.005667757750 |
| F <sub>15,9,8,8</sub> | -0.009212159323 | -0.038327445441 |
| F <sub>15,9,9,9</sub> | 0.024815098038  | 0.026842682483  |

**Table S8** C<sub>s</sub> methanediol force constants in mdyne/Å<sup>n</sup>rad<sup>m</sup> with coordinates matching those from Eqs. 16-30 of the main text.

|                      | F12-TZ-cCR      | F12-DZ-cCR      |
|----------------------|-----------------|-----------------|
| F <sub>1,1,0,0</sub> | 5.078350978527  | 5.073324702700  |
| F <sub>2,1,0,0</sub> | 0.052549736260  | 0.054881668961  |
| F <sub>2,2,0,0</sub> | 5.457239598401  | 5.455265688468  |
| F <sub>3,1,0,0</sub> | 0.304170441925  | 0.305751567574  |
| F <sub>3,2,0,0</sub> | 0.247414691157  | 0.249234299705  |
| F <sub>3,3,0,0</sub> | 6.273551342003  | 6.255934157090  |
| F <sub>4,1,0,0</sub> | 0.013163988840  | 0.013543796912  |
| F <sub>4,2,0,0</sub> | -0.042134742863 | -0.041956440274 |
| F <sub>4,3,0,0</sub> | -0.036912267379 | -0.033754501294 |
| F <sub>4,4,0,0</sub> | 8.289416686570  | 8.303780884432  |
| F <sub>5,1,0,0</sub> | 0.144015986759  | 0.145419387384  |
| F <sub>5,2,0,0</sub> | 0.015123559263  | 0.016099020975  |
| F <sub>5,3,0,0</sub> | -0.361294080549 | -0.360747890713 |

|                        |                 |                 |
|------------------------|-----------------|-----------------|
| F <sub>5,4,0,0</sub>   | -0.064781711182 | -0.065027804127 |
| F <sub>5,5,0,0</sub>   | 1.042954926249  | 1.044806806332  |
| F <sub>6,1,0,0</sub>   | 0.149368293822  | 0.150833219556  |
| F <sub>6,2,0,0</sub>   | -0.104867749703 | -0.105236098748 |
| F <sub>6,3,0,0</sub>   | -0.238628408370 | -0.237272932580 |
| F <sub>6,4,0,0</sub>   | -0.067575038617 | -0.067962103618 |
| F <sub>6,5,0,0</sub>   | 0.477368165946  | 0.477836254920  |
| F <sub>6,6,0,0</sub>   | 2.215301711112  | 2.216318258402  |
| F <sub>7,1,0,0</sub>   | -0.003152325338 | -0.003529970911 |
| F <sub>7,2,0,0</sub>   | 0.039140223052  | 0.039802917267  |
| F <sub>7,3,0,0</sub>   | 0.413841311770  | 0.414777627535  |
| F <sub>7,4,0,0</sub>   | 0.138168873678  | 0.140710355740  |
| F <sub>7,5,0,0</sub>   | -0.080238329602 | -0.081031178432 |
| F <sub>7,6,0,0</sub>   | -0.078443903384 | -0.079092279824 |
| F <sub>7,7,0,0</sub>   | 0.805274389433  | 0.808966414137  |
| F <sub>8,1,0,0</sub>   | 0.022214026330  | 0.021797572252  |
| F <sub>8,2,0,0</sub>   | -0.114405748436 | -0.115625804887 |
| F <sub>8,3,0,0</sub>   | 0.257843843345  | 0.257357467511  |
| F <sub>8,4,0,0</sub>   | -0.101046489136 | -0.100839476774 |
| F <sub>8,5,0,0</sub>   | 0.459182661171  | 0.459230169093  |
| F <sub>8,6,0,0</sub>   | -0.592106158868 | -0.588893708743 |
| F <sub>8,7,0,0</sub>   | -0.115219184014 | -0.117125502199 |
| F <sub>8,8,0,0</sub>   | 2.499663911445  | 2.494786718889  |
| F <sub>9,1,0,0</sub>   | 0.012740475948  | 0.012754322283  |
| F <sub>9,2,0,0</sub>   | -0.008673321315 | -0.008610429413 |
| F <sub>9,3,0,0</sub>   | -0.002297934351 | -0.002348586751 |
| F <sub>9,4,0,0</sub>   | 0.022194134162  | 0.022580929816  |
| F <sub>9,5,0,0</sub>   | -0.009033083233 | -0.008959038962 |
| F <sub>9,6,0,0</sub>   | 0.011681787402  | 0.012838188729  |
| F <sub>9,7,0,0</sub>   | -0.010095730836 | -0.010329888498 |
| F <sub>9,8,0,0</sub>   | 0.096918565856  | 0.094352676256  |
| F <sub>9,9,0,0</sub>   | 0.061855395760  | 0.061260724447  |
| F <sub>10,10,0,0</sub> | 4.776900801422  | 4.764254217169  |
| F <sub>11,10,0,0</sub> | -0.031361225231 | -0.028303202694 |
| F <sub>11,11,0,0</sub> | 8.297369312795  | 8.311752255363  |
| F <sub>12,10,0,0</sub> | 0.280691060452  | 0.280395174103  |
| F <sub>12,11,0,0</sub> | -0.068919933397 | -0.069128647628 |
| F <sub>12,12,0,0</sub> | 0.912578858120  | 0.914425167180  |
| F <sub>13,10,0,0</sub> | 0.359773280842  | 0.361601988622  |
| F <sub>13,11,0,0</sub> | 0.119804840939  | 0.122031016416  |
| F <sub>13,12,0,0</sub> | -0.056724434399 | -0.057857818770 |
| F <sub>13,13,0,0</sub> | 0.768763331994  | 0.772631222567  |
| F <sub>14,10,0,0</sub> | -0.435167527313 | -0.435579024977 |
| F <sub>14,11,0,0</sub> | -0.035942879742 | -0.035910643189 |
| F <sub>14,12,0,0</sub> | 0.285144225931  | 0.285611046073  |
| F <sub>14,13,0,0</sub> | -0.080190137949 | -0.080631988444 |
| F <sub>14,14,0,0</sub> | 0.563203023284  | 0.565081607788  |
| F <sub>15,10,0,0</sub> | -0.052581890605 | -0.051600699395 |
| F <sub>15,11,0,0</sub> | 0.020380255030  | 0.020909741820  |
| F <sub>15,12,0,0</sub> | 0.032468597761  | 0.033380301519  |
| F <sub>15,13,0,0</sub> | -0.016448939313 | -0.016422708754 |
| F <sub>15,14,0,0</sub> | 0.043206006526  | 0.043172964175  |

|                        |                  |                  |
|------------------------|------------------|------------------|
| F <sub>15,15,0,0</sub> | 0.017098167052   | 0.016520852895   |
| F <sub>1,1,1,0</sub>   | -30.171800014565 | -30.242960449632 |
| F <sub>2,1,1,0</sub>   | 0.021404156225   | 0.021563275795   |
| F <sub>2,2,1,0</sub>   | 0.069992823273   | 0.069055589437   |
| F <sub>2,2,2,0</sub>   | -31.671890465756 | -31.750765671969 |
| F <sub>3,1,1,0</sub>   | 0.464373151060   | 0.460903084882   |
| F <sub>3,2,1,0</sub>   | -0.058155403890  | -0.061137056992  |
| F <sub>3,2,2,0</sub>   | 0.338037473318   | 0.335371025073   |
| F <sub>3,3,1,0</sub>   | -1.083444944751  | -1.078289663431  |
| F <sub>3,3,2,0</sub>   | -0.964175318285  | -0.958677435760  |
| F <sub>3,3,3,0</sub>   | -26.271075193040 | -26.126734382754 |
| F <sub>4,1,1,0</sub>   | -0.078500957675  | -0.078471308104  |
| F <sub>4,2,1,0</sub>   | 0.006568874564   | 0.006387752610   |
| F <sub>4,2,2,0</sub>   | -0.003764168409  | -0.002091498455  |
| F <sub>4,3,1,0</sub>   | -0.019565186743  | -0.020150103390  |
| F <sub>4,3,2,0</sub>   | 0.034019374932   | 0.034081300654   |
| F <sub>4,3,3,0</sub>   | -0.492064502796  | -0.488056662720  |
| F <sub>4,4,1,0</sub>   | 0.056690843283   | 0.058655786043   |
| F <sub>4,4,2,0</sub>   | -0.029912319091  | -0.028977782553  |
| F <sub>4,4,3,0</sub>   | 0.346050695098   | 0.344829104093   |
| F <sub>4,4,4,0</sub>   | -41.409765615612 | -41.470143179387 |
| F <sub>5,1,1,0</sub>   | 0.175695530692   | 0.167583333681   |
| F <sub>5,2,1,0</sub>   | -0.289071536383  | -0.290487996331  |
| F <sub>5,2,2,0</sub>   | -0.012505889227  | -0.015965057918  |
| F <sub>5,3,1,0</sub>   | -0.012073255277  | -0.010426526840  |
| F <sub>5,3,2,0</sub>   | 0.325942788685   | 0.325523897829   |
| F <sub>5,3,3,0</sub>   | 0.262531989955   | 0.261415533249   |
| F <sub>5,4,1,0</sub>   | -0.003705902451  | -0.003654140878  |
| F <sub>5,4,2,0</sub>   | -0.006290979917  | -0.006661420179  |
| F <sub>5,4,3,0</sub>   | 0.187841622845   | 0.188155834514   |
| F <sub>5,4,4,0</sub>   | -0.035325525279  | -0.035831712810  |
| F <sub>5,5,1,0</sub>   | -0.295543762464  | -0.298499239583  |
| F <sub>5,5,2,0</sub>   | -0.432754107948  | -0.431474843941  |
| F <sub>5,5,3,0</sub>   | -0.542436952987  | -0.538330042153  |
| F <sub>5,5,4,0</sub>   | -0.090704435968  | -0.088379711885  |
| F <sub>5,5,5,0</sub>   | 0.074400048344   | 0.060697040744   |
| F <sub>6,1,1,0</sub>   | 0.460627977278   | 0.454215611045   |
| F <sub>6,2,1,0</sub>   | 0.020582577566   | 0.021163561690   |
| F <sub>6,2,2,0</sub>   | -0.193869872643  | -0.190391775121  |
| F <sub>6,3,1,0</sub>   | -0.682879603650  | -0.684975922434  |
| F <sub>6,3,2,0</sub>   | 0.275392910832   | 0.274424856907   |
| F <sub>6,3,3,0</sub>   | 1.271146027642   | 1.263853966488   |
| F <sub>6,4,1,0</sub>   | -0.043455617724  | -0.044246637919  |
| F <sub>6,4,2,0</sub>   | 0.003435102831   | 0.002666094723   |
| F <sub>6,4,3,0</sub>   | 0.171380873309   | 0.172621499286   |
| F <sub>6,4,4,0</sub>   | -0.002049984002  | -0.001055513987  |
| F <sub>6,5,1,0</sub>   | 0.010429392016   | 0.007983040489   |
| F <sub>6,5,2,0</sub>   | -0.113256750256  | -0.110722884497  |
| F <sub>6,5,3,0</sub>   | -0.573359492169  | -0.567769364130  |
| F <sub>6,5,4,0</sub>   | -0.056378589531  | -0.055384016721  |
| F <sub>6,5,5,0</sub>   | 0.733763406590   | 0.726907061924   |
| F <sub>6,6,1,0</sub>   | -0.276637938200  | -0.283756353595  |

|                      |                 |                 |
|----------------------|-----------------|-----------------|
| F <sub>6,6,2,0</sub> | -0.042755361713 | -0.039076381402 |
| F <sub>6,6,3,0</sub> | -3.654883299197 | -3.646174086014 |
| F <sub>6,6,4,0</sub> | -0.017714078421 | -0.018515116599 |
| F <sub>6,6,5,0</sub> | 0.295491248150  | 0.285959692166  |
| F <sub>6,6,6,0</sub> | 1.895771902256  | 1.874930379192  |
| F <sub>7,1,1,0</sub> | 0.021750986460  | 0.021522847413  |
| F <sub>7,2,1,0</sub> | 0.011937326077  | 0.011863020819  |
| F <sub>7,2,2,0</sub> | 0.037169470492  | 0.037129015891  |
| F <sub>7,3,1,0</sub> | 0.039872497328  | 0.040729851330  |
| F <sub>7,3,2,0</sub> | -0.067929038339 | -0.068819491514 |
| F <sub>7,3,3,0</sub> | -0.572535428412 | -0.576243792352 |
| F <sub>7,4,1,0</sub> | -0.023409614173 | -0.023088006158 |
| F <sub>7,4,2,0</sub> | 0.002959047796  | 0.004801978755  |
| F <sub>7,4,3,0</sub> | -0.254339445786 | -0.255817280899 |
| F <sub>7,4,4,0</sub> | 0.050046299718  | 0.043017755370  |
| F <sub>7,5,1,0</sub> | 0.015949998985  | 0.015451781260  |
| F <sub>7,5,2,0</sub> | 0.031615463550  | 0.032475521806  |
| F <sub>7,5,3,0</sub> | -0.103684566140 | -0.102346613731 |
| F <sub>7,5,4,0</sub> | 0.029476360248  | 0.029792878434  |
| F <sub>7,5,5,0</sub> | -0.054382488139 | -0.055635223219 |
| F <sub>7,6,1,0</sub> | -0.013453923449 | -0.014111422376 |
| F <sub>7,6,2,0</sub> | 0.014485651112  | 0.015330934358  |
| F <sub>7,6,3,0</sub> | -0.041495260104 | -0.040915521358 |
| F <sub>7,6,4,0</sub> | 0.046334562237  | 0.047089805878  |
| F <sub>7,6,5,0</sub> | -0.036422147869 | -0.037684837406 |
| F <sub>7,6,6,0</sub> | -0.099783549901 | -0.101167353119 |
| F <sub>7,7,1,0</sub> | -0.031163813842 | -0.030428405362 |
| F <sub>7,7,2,0</sub> | -0.036342127996 | -0.035665530454 |
| F <sub>7,7,3,0</sub> | -0.602166208203 | -0.606309514418 |
| F <sub>7,7,4,0</sub> | -0.044227222454 | -0.045214535728 |
| F <sub>7,7,5,0</sub> | 0.043971188771  | 0.044084214014  |
| F <sub>7,7,6,0</sub> | 0.021492588717  | 0.020314812989  |
| F <sub>7,7,7,0</sub> | -0.740340686854 | -0.740316149133 |
| F <sub>8,1,1,0</sub> | 0.024066021670  | 0.023787580570  |
| F <sub>8,2,1,0</sub> | -0.038679986018 | -0.040336762805 |
| F <sub>8,2,2,0</sub> | -0.302278325272 | -0.297864836327 |
| F <sub>8,3,1,0</sub> | 0.013152834454  | 0.015896279478  |
| F <sub>8,3,2,0</sub> | 0.516998157292  | 0.517758992601  |
| F <sub>8,3,3,0</sub> | -1.698210123529 | -1.700365644177 |
| F <sub>8,4,1,0</sub> | -0.010504659005 | -0.009761596283 |
| F <sub>8,4,2,0</sub> | -0.020876145188 | -0.022361677617 |
| F <sub>8,4,3,0</sub> | 0.239250684290  | 0.238563148657  |
| F <sub>8,4,4,0</sub> | -0.030557760238 | -0.031151565365 |
| F <sub>8,5,1,0</sub> | -0.091312997672 | -0.093987144752 |
| F <sub>8,5,2,0</sub> | -0.152898607727 | -0.155489725125 |
| F <sub>8,5,3,0</sub> | -0.433364125753 | -0.434388231317 |
| F <sub>8,5,4,0</sub> | -0.081253666590 | -0.080101704496 |
| F <sub>8,5,5,0</sub> | 0.109058959551  | 0.107094972852  |
| F <sub>8,6,1,0</sub> | 0.073529774646  | 0.073778185883  |
| F <sub>8,6,2,0</sub> | -0.099170530281 | -0.101772624190 |
| F <sub>8,6,3,0</sub> | 1.443142688561  | 1.439352512408  |
| F <sub>8,6,4,0</sub> | 0.012751380493  | 0.014278455119  |

|                      |                 |                 |
|----------------------|-----------------|-----------------|
| F <sub>8,6,5,0</sub> | 0.376598317732  | 0.378479275978  |
| F <sub>8,6,6,0</sub> | -1.488440420968 | -1.484657205099 |
| F <sub>8,7,1,0</sub> | 0.007915780536  | 0.007860456728  |
| F <sub>8,7,2,0</sub> | 0.072337243991  | 0.073121661103  |
| F <sub>8,7,3,0</sub> | -0.041307694918 | -0.042769504658 |
| F <sub>8,7,4,0</sub> | -0.027471539024 | -0.029503377340 |
| F <sub>8,7,5,0</sub> | -0.054873646938 | -0.056754466486 |
| F <sub>8,7,6,0</sub> | -0.024082158092 | -0.025707189510 |
| F <sub>8,7,7,0</sub> | 0.063794207549  | 0.060507989316  |
| F <sub>8,8,1,0</sub> | 0.078983903357  | 0.084127461168  |
| F <sub>8,8,2,0</sub> | -0.305216038447 | -0.311157606478 |
| F <sub>8,8,3,0</sub> | -4.354170716913 | -4.351940949808 |
| F <sub>8,8,4,0</sub> | 0.030770129405  | 0.028303027885  |
| F <sub>8,8,5,0</sub> | 0.357238074212  | 0.357195030321  |
| F <sub>8,8,6,0</sub> | 1.384722835366  | 1.377606608051  |
| F <sub>8,8,7,0</sub> | 0.002887583948  | -0.001476216408 |
| F <sub>8,8,8,0</sub> | -4.282925235423 | -4.259327641268 |
| F <sub>9,1,1,0</sub> | 0.013830046437  | 0.015014408026  |
| F <sub>9,2,1,0</sub> | -0.012333665383 | -0.012573920834 |
| F <sub>9,2,2,0</sub> | -0.033007247075 | -0.033433840491 |
| F <sub>9,3,1,0</sub> | -0.073118209917 | -0.073688064608 |
| F <sub>9,3,2,0</sub> | 0.064881502036  | 0.065340956495  |
| F <sub>9,3,3,0</sub> | 0.135679820731  | 0.134612553706  |
| F <sub>9,4,1,0</sub> | 0.025954511670  | 0.026916867565  |
| F <sub>9,4,2,0</sub> | 0.008684514047  | 0.008601222947  |
| F <sub>9,4,3,0</sub> | -0.085840963226 | -0.087045116649 |
| F <sub>9,4,4,0</sub> | 0.004630750708  | 0.004833728648  |
| F <sub>9,5,1,0</sub> | -0.010212329044 | -0.010240640298 |
| F <sub>9,5,2,0</sub> | 0.011389767505  | 0.010063895142  |
| F <sub>9,5,3,0</sub> | 0.006539424967  | 0.005779440708  |
| F <sub>9,5,4,0</sub> | -0.004865371063 | -0.005425882309 |
| F <sub>9,5,5,0</sub> | -0.046752590464 | -0.045059485393 |
| F <sub>9,6,1,0</sub> | 0.005730400615  | 0.005196612740  |
| F <sub>9,6,2,0</sub> | -0.012640877012 | -0.012555498680 |
| F <sub>9,6,3,0</sub> | -0.081544877931 | -0.082343700811 |
| F <sub>9,6,4,0</sub> | -0.071419920506 | -0.071267509829 |
| F <sub>9,6,5,0</sub> | 0.065089678949  | 0.067073733824  |
| F <sub>9,6,6,0</sub> | -0.125616679429 | -0.121351022056 |
| F <sub>9,7,1,0</sub> | -0.008602416687 | -0.008858462379 |
| F <sub>9,7,2,0</sub> | 0.008702039187  | 0.008837955141  |
| F <sub>9,7,3,0</sub> | 0.073704243522  | 0.073614906953  |
| F <sub>9,7,4,0</sub> | -0.068971441195 | -0.070389040727 |
| F <sub>9,7,5,0</sub> | 0.003758013018  | 0.002961715028  |
| F <sub>9,7,6,0</sub> | -0.097624428568 | -0.099016614025 |
| F <sub>9,7,7,0</sub> | 0.006807850120  | 0.005588582773  |
| F <sub>9,8,1,0</sub> | 0.005603025745  | 0.005808358518  |
| F <sub>9,8,2,0</sub> | -0.034541794466 | -0.035394887800 |
| F <sub>9,8,3,0</sub> | -0.061326151339 | -0.063141874524 |
| F <sub>9,8,4,0</sub> | 0.086917646603  | 0.085751659960  |
| F <sub>9,8,5,0</sub> | -0.046566136638 | -0.046467899587 |
| F <sub>9,8,6,0</sub> | 0.098980802032  | 0.091316997156  |
| F <sub>9,8,7,0</sub> | 0.088997339138  | 0.087613121951  |

|                        |                  |                  |
|------------------------|------------------|------------------|
| F <sub>9,8,8,0</sub>   | 0.140941165326   | 0.144399516378   |
| F <sub>9,9,1,0</sub>   | 0.010219581855   | 0.010775778544   |
| F <sub>9,9,2,0</sub>   | -0.043831088618  | -0.043482782796  |
| F <sub>9,9,3,0</sub>   | -0.065681998478  | -0.066107448902  |
| F <sub>9,9,4,0</sub>   | 0.027851795820   | 0.028226768300   |
| F <sub>9,9,5,0</sub>   | 0.044407283472   | 0.043628714002   |
| F <sub>9,9,6,0</sub>   | -0.025483192793  | -0.031026746695  |
| F <sub>9,9,7,0</sub>   | -0.026564113006  | -0.026981172770  |
| F <sub>9,9,8,0</sub>   | 0.139149249682   | 0.138160889679   |
| F <sub>9,9,9,0</sub>   | -0.005958376620  | -0.006348611258  |
| F <sub>10,10,1,0</sub> | -0.808059771476  | -0.800357748394  |
| F <sub>10,10,2,0</sub> | -0.753740421829  | -0.743262281784  |
| F <sub>10,10,3,0</sub> | -22.616649540470 | -22.502634847600 |
| F <sub>10,10,4,0</sub> | -0.515285333481  | -0.512682296351  |
| F <sub>10,10,5,0</sub> | 0.231145998425   | 0.231369902778   |
| F <sub>10,10,6,0</sub> | -0.559558112103  | -0.561973098200  |
| F <sub>10,10,7,0</sub> | -0.874879074026  | -0.877127210830  |
| F <sub>10,10,8,0</sub> | 0.676403746435   | 0.669584473348   |
| F <sub>10,10,9,0</sub> | -0.078178780646  | -0.077396943996  |
| F <sub>11,10,1,0</sub> | -0.019778319587  | -0.020034707613  |
| F <sub>11,10,2,0</sub> | 0.038016656580   | 0.038960557532   |
| F <sub>11,10,3,0</sub> | -0.306613719818  | -0.305499188885  |
| F <sub>11,10,4,0</sub> | 0.198120570109   | 0.196211523970   |
| F <sub>11,10,5,0</sub> | 0.116167061744   | 0.116073601862   |
| F <sub>11,10,6,0</sub> | 0.093910351576   | 0.095398613239   |
| F <sub>11,10,7,0</sub> | -0.206609059880  | -0.207425543151  |
| F <sub>11,10,8,0</sub> | 0.247279365933   | 0.247010493992   |
| F <sub>11,10,9,0</sub> | -0.048100941620  | -0.048341607456  |
| F <sub>11,11,1,0</sub> | 0.052641145440   | 0.054539522988   |
| F <sub>11,11,2,0</sub> | -0.030335357109  | -0.029395704095  |
| F <sub>11,11,3,0</sub> | 0.293417724887   | 0.293087385695   |
| F <sub>11,11,4,0</sub> | -41.391924424992 | -41.452065722990 |
| F <sub>11,11,5,0</sub> | -0.025050163716  | -0.025303710230  |
| F <sub>11,11,6,0</sub> | 0.004444189394   | 0.004289082031   |
| F <sub>11,11,7,0</sub> | 0.027694437383   | 0.020643496150   |
| F <sub>11,11,8,0</sub> | -0.010063933556  | -0.010572708700  |
| F <sub>11,11,9,0</sub> | 0.004721490563   | 0.004666667796   |
| F <sub>12,10,1,0</sub> | -0.336974294349  | -0.340422843262  |
| F <sub>12,10,2,0</sub> | 0.229891971863   | 0.230535489752   |
| F <sub>12,10,3,0</sub> | -0.517935777387  | -0.522024459955  |
| F <sub>12,10,4,0</sub> | 0.172430309016   | 0.172522574042   |
| F <sub>12,10,5,0</sub> | -0.710571283638  | -0.710132808678  |
| F <sub>12,10,6,0</sub> | -1.144852214115  | -1.148682488612  |
| F <sub>12,10,7,0</sub> | -0.055376263293  | -0.054932793576  |
| F <sub>12,10,8,0</sub> | -0.378124719462  | -0.377019728261  |
| F <sub>12,10,9,0</sub> | -0.014116448055  | -0.014032473597  |
| F <sub>12,11,1,0</sub> | -0.061037177920  | -0.061600985984  |
| F <sub>12,11,2,0</sub> | 0.003638484021   | 0.003440444399   |
| F <sub>12,11,3,0</sub> | 0.158234237690   | 0.158927235851   |
| F <sub>12,11,4,0</sub> | 0.042455822457   | 0.042216168397   |
| F <sub>12,11,5,0</sub> | -0.040393409376  | -0.039877559013  |
| F <sub>12,11,6,0</sub> | 0.014180194194   | 0.014572438795   |

|                        |                 |                 |
|------------------------|-----------------|-----------------|
| F <sub>12,11,7,0</sub> | 0.048124010255  | 0.048432475392  |
| F <sub>12,11,8,0</sub> | -0.092591741741 | -0.090571705710 |
| F <sub>12,11,9,0</sub> | -0.048274280764 | -0.047901807462 |
| F <sub>12,12,1,0</sub> | -0.294178596545 | -0.296859097566 |
| F <sub>12,12,2,0</sub> | -0.148260066030 | -0.148594263776 |
| F <sub>12,12,3,0</sub> | -0.744908721773 | -0.747874661381 |
| F <sub>12,12,4,0</sub> | -0.041017548729 | -0.039643953961 |
| F <sub>12,12,5,0</sub> | 0.600882770219  | 0.603286900290  |
| F <sub>12,12,6,0</sub> | -0.942430133175 | -0.944031805418 |
| F <sub>12,12,7,0</sub> | -0.047077735292 | -0.048812410807 |
| F <sub>12,12,8,0</sub> | 0.739844752700  | 0.739900779184  |
| F <sub>12,12,9,0</sub> | 0.015180749668  | 0.015188208365  |
| F <sub>13,10,1,0</sub> | 0.041635043576  | 0.041467570895  |
| F <sub>13,10,2,0</sub> | -0.053727197967 | -0.053881953138 |
| F <sub>13,10,3,0</sub> | -0.648396420641 | -0.652743267289 |
| F <sub>13,10,4,0</sub> | -0.227160597697 | -0.227900642236 |
| F <sub>13,10,5,0</sub> | -0.050548643034 | -0.048732276208 |
| F <sub>13,10,6,0</sub> | -0.093262923945 | -0.093746988780 |
| F <sub>13,10,7,0</sub> | -0.686237397114 | -0.688906727913 |
| F <sub>13,10,8,0</sub> | -0.041689600944 | -0.040007073192 |
| F <sub>13,10,9,0</sub> | 0.015368089679  | 0.015563507252  |
| F <sub>13,11,1,0</sub> | -0.020035083781 | -0.020071786754 |
| F <sub>13,11,2,0</sub> | 0.000525526222  | 0.002281454489  |
| F <sub>13,11,3,0</sub> | -0.190890618227 | -0.191353980774 |
| F <sub>13,11,4,0</sub> | 0.009501038100  | 0.002357280003  |
| F <sub>13,11,5,0</sub> | 0.010001790336  | 0.010256749559  |
| F <sub>13,11,6,0</sub> | 0.052032509560  | 0.053039306499  |
| F <sub>13,11,7,0</sub> | -0.012269337457 | -0.012279988233 |
| F <sub>13,11,8,0</sub> | 0.020334309192  | 0.020497845967  |
| F <sub>13,11,9,0</sub> | -0.032201237309 | -0.033113077090 |
| F <sub>13,12,1,0</sub> | 0.016189338169  | 0.015580094777  |
| F <sub>13,12,2,0</sub> | 0.037706926948  | 0.038504761340  |
| F <sub>13,12,3,0</sub> | -0.089603512893 | -0.089641788405 |
| F <sub>13,12,4,0</sub> | 0.055680980513  | 0.055675267285  |
| F <sub>13,12,5,0</sub> | -0.071255245801 | -0.071965613544 |
| F <sub>13,12,6,0</sub> | -0.026971932387 | -0.027802023506 |
| F <sub>13,12,7,0</sub> | 0.015100550090  | 0.013952115921  |
| F <sub>13,12,8,0</sub> | -0.054682662285 | -0.054469585312 |
| F <sub>13,12,9,0</sub> | 0.005223579815  | 0.005830634713  |
| F <sub>13,13,1,0</sub> | -0.034494853937 | -0.034402920773 |
| F <sub>13,13,2,0</sub> | -0.039488384767 | -0.038818338093 |
| F <sub>13,13,3,0</sub> | -0.564121097267 | -0.566807689504 |
| F <sub>13,13,4,0</sub> | -0.060128683654 | -0.059342812814 |
| F <sub>13,13,5,0</sub> | 0.055761442463  | 0.056081979041  |
| F <sub>13,13,6,0</sub> | 0.028540709512  | 0.026737076841  |
| F <sub>13,13,7,0</sub> | -0.680756099037 | -0.678518338680 |
| F <sub>13,13,8,0</sub> | 0.183613811306  | 0.183560363328  |
| F <sub>13,13,9,0</sub> | 0.045918215875  | 0.045827153042  |
| F <sub>14,10,1,0</sub> | -0.037036143258 | -0.037204776608 |
| F <sub>14,10,2,0</sub> | 0.345874561982  | 0.346571521485  |
| F <sub>14,10,3,0</sub> | 0.589592656161  | 0.591333322434  |
| F <sub>14,10,4,0</sub> | 0.104266018693  | 0.104022967004  |



|                        |                 |                 |
|------------------------|-----------------|-----------------|
| F <sub>14,10,5,0</sub> | -0.238497888003 | -0.239950117127 |
| F <sub>14,10,6,0</sub> | -0.243332637974 | -0.245727660273 |
| F <sub>14,10,7,0</sub> | -0.014798215923 | -0.013519318138 |
| F <sub>14,10,8,0</sub> | -0.712137378550 | -0.711792304471 |
| F <sub>14,10,9,0</sub> | -0.090572772092 | -0.091782775447 |
| F <sub>14,11,1,0</sub> | 0.007724380050  | 0.007943743528  |
| F <sub>14,11,2,0</sub> | 0.009753699037  | 0.008335074947  |
| F <sub>14,11,3,0</sub> | 0.105971277821  | 0.105952452176  |
| F <sub>14,11,4,0</sub> | -0.058685951053 | -0.058673028721 |
| F <sub>14,11,5,0</sub> | -0.025934199818 | -0.025636964436 |
| F <sub>14,11,6,0</sub> | -0.020501484534 | -0.019904256323 |
| F <sub>14,11,7,0</sub> | -0.025811396296 | -0.026343849719 |
| F <sub>14,11,8,0</sub> | -0.052205463417 | -0.050271133686 |
| F <sub>14,11,9,0</sub> | 0.014630070468  | 0.014890406110  |
| F <sub>14,12,1,0</sub> | -0.057178272879 | -0.058564357404 |
| F <sub>14,12,2,0</sub> | -0.139675547252 | -0.140127936303 |
| F <sub>14,12,3,0</sub> | -0.181183490071 | -0.182519068683 |
| F <sub>14,12,4,0</sub> | -0.023037935210 | -0.021549230062 |
| F <sub>14,12,5,0</sub> | 0.231681465736  | 0.234393736273  |
| F <sub>14,12,6,0</sub> | -0.006083251659 | -0.006085234822 |
| F <sub>14,12,7,0</sub> | 0.007631463745  | 0.007183758750  |
| F <sub>14,12,8,0</sub> | -0.066103382257 | -0.065230611249 |
| F <sub>14,12,9,0</sub> | 0.001939862114  | 0.001353333046  |
| F <sub>14,13,1,0</sub> | -0.010249326081 | -0.010265426732 |
| F <sub>14,13,2,0</sub> | 0.052585850781  | 0.053667140905  |
| F <sub>14,13,3,0</sub> | -0.024290252824 | -0.023635632432 |
| F <sub>14,13,4,0</sub> | -0.025413730878 | -0.026050276041 |
| F <sub>14,13,5,0</sub> | 0.022986949590  | 0.021984580792  |
| F <sub>14,13,6,0</sub> | -0.004306784230 | -0.004865325304 |
| F <sub>14,13,7,0</sub> | 0.075714307929  | 0.075547257089  |
| F <sub>14,13,8,0</sub> | -0.008160972870 | -0.008477611725 |
| F <sub>14,13,9,0</sub> | 0.005239482540  | 0.005431308454  |
| F <sub>14,14,1,0</sub> | 0.018243284325  | 0.018866277371  |
| F <sub>14,14,2,0</sub> | -0.229092972795 | -0.227084740072 |
| F <sub>14,14,3,0</sub> | -0.624455297177 | -0.625302133030 |
| F <sub>14,14,4,0</sub> | -0.082155002610 | -0.080320984039 |
| F <sub>14,14,5,0</sub> | -0.031515952538 | -0.030304979068 |
| F <sub>14,14,6,0</sub> | 0.162719380587  | 0.162714549816  |
| F <sub>14,14,7,0</sub> | -0.045728933988 | -0.046194672783 |
| F <sub>14,14,8,0</sub> | 0.631224186017  | 0.632534372448  |
| F <sub>14,14,9,0</sub> | 0.037923833156  | 0.037329397744  |
| F <sub>15,10,1,0</sub> | -0.097889144899 | -0.098181325090 |
| F <sub>15,10,2,0</sub> | 0.018679336418  | 0.019527263370  |
| F <sub>15,10,3,0</sub> | 0.156735607885  | 0.157463191007  |
| F <sub>15,10,4,0</sub> | -0.066790132277 | -0.066983820800 |
| F <sub>15,10,5,0</sub> | 0.092400863419  | 0.092725533724  |
| F <sub>15,10,6,0</sub> | -0.199838615836 | -0.196775751617 |
| F <sub>15,10,7,0</sub> | 0.026193391796  | 0.026715155872  |
| F <sub>15,10,8,0</sub> | 0.070813070965  | 0.068308361432  |
| F <sub>15,10,9,0</sub> | -0.181810378515 | -0.182329317321 |
| F <sub>15,11,1,0</sub> | 0.031911226276  | 0.032473010904  |
| F <sub>15,11,2,0</sub> | 0.006104057089  | 0.005874779783  |

|                        |                  |                  |
|------------------------|------------------|------------------|
| F <sub>15,11,3,0</sub> | -0.074929729658  | -0.076278482954  |
| F <sub>15,11,4,0</sub> | -0.012949221386  | -0.012941134332  |
| F <sub>15,11,5,0</sub> | 0.002588462208   | 0.002402200391   |
| F <sub>15,11,6,0</sub> | -0.090596154374  | -0.090437337675  |
| F <sub>15,11,7,0</sub> | -0.045661044623  | -0.047091552069  |
| F <sub>15,11,8,0</sub> | 0.152008684143   | 0.152188192683   |
| F <sub>15,11,9,0</sub> | 0.041384419321   | 0.042094338428   |
| F <sub>15,12,1,0</sub> | 0.023906729143   | 0.023989119420   |
| F <sub>15,12,2,0</sub> | 0.025732865184   | 0.025599173227   |
| F <sub>15,12,3,0</sub> | -0.094001544080  | -0.094971487829  |
| F <sub>15,12,4,0</sub> | -0.037427832711  | -0.037201334027  |
| F <sub>15,12,5,0</sub> | -0.022438269820  | -0.021601207798  |
| F <sub>15,12,6,0</sub> | 0.108131809246   | 0.111051533452   |
| F <sub>15,12,7,0</sub> | -0.029080181509  | -0.028089740099  |
| F <sub>15,12,8,0</sub> | -0.133865018575  | -0.137513108206  |
| F <sub>15,12,9,0</sub> | 0.037532603468   | 0.035549135844   |
| F <sub>15,13,1,0</sub> | -0.007366420759  | -0.007392142329  |
| F <sub>15,13,2,0</sub> | -0.002588782477  | -0.002695712319  |
| F <sub>15,13,3,0</sub> | 0.078267461448   | 0.078647626326   |
| F <sub>15,13,4,0</sub> | -0.052304447111  | -0.052961138237  |
| F <sub>15,13,5,0</sub> | 0.016951594530   | 0.016330528997   |
| F <sub>15,13,6,0</sub> | -0.112915788975  | -0.113743773926  |
| F <sub>15,13,7,0</sub> | 0.024303645946   | 0.024447151459   |
| F <sub>15,13,8,0</sub> | 0.162375704148   | 0.163684579832   |
| F <sub>15,13,9,0</sub> | -0.017149879003  | -0.016421507005  |
| F <sub>15,14,1,0</sub> | 0.004109609179   | 0.003836311703   |
| F <sub>15,14,2,0</sub> | 0.016573726833   | 0.017150940536   |
| F <sub>15,14,3,0</sub> | -0.071176178189  | -0.071616238683  |
| F <sub>15,14,4,0</sub> | 0.010416833576   | 0.011018156739   |
| F <sub>15,14,5,0</sub> | -0.042988656744  | -0.042615676233  |
| F <sub>15,14,6,0</sub> | 0.039353415857   | 0.038939090045   |
| F <sub>15,14,7,0</sub> | 0.005143464076   | 0.005503164916   |
| F <sub>15,14,8,0</sub> | 0.054615125972   | 0.053477058499   |
| F <sub>15,14,9,0</sub> | 0.063208054326   | 0.062581395256   |
| F <sub>15,15,1,0</sub> | -0.004621143022  | -0.004270780213  |
| F <sub>15,15,2,0</sub> | -0.045371871541  | -0.045043325137  |
| F <sub>15,15,3,0</sub> | 0.005165471897   | 0.005338248258   |
| F <sub>15,15,4,0</sub> | 0.017077767835   | 0.018426549775   |
| F <sub>15,15,5,0</sub> | 0.060275205592   | 0.059933405002   |
| F <sub>15,15,6,0</sub> | -0.061194753669  | -0.066419195714  |
| F <sub>15,15,7,0</sub> | 0.042190398920   | 0.042264046968   |
| F <sub>15,15,8,0</sub> | 0.262221354185   | 0.264565697256   |
| F <sub>15,15,9,0</sub> | 0.005152689204   | 0.005538568538   |
| F <sub>1,1,1,1</sub>   | 156.939416768687 | 157.177960505033 |
| F <sub>2,1,1,1</sub>   | -0.854547730711  | -0.905207458203  |
| F <sub>2,2,1,1</sub>   | 0.013360304285   | 0.004724351365   |
| F <sub>2,2,2,1</sub>   | -0.908665673505  | -0.932885242246  |
| F <sub>2,2,2,2</sub>   | 163.835606242061 | 163.916633091521 |
| F <sub>3,1,1,1</sub>   | -2.043109724824  | -1.998130455896  |
| F <sub>3,2,1,1</sub>   | -0.080784667501  | -0.068069205009  |
| F <sub>3,2,2,1</sub>   | -0.111526339481  | -0.095803553448  |
| F <sub>3,2,2,2</sub>   | -1.718966033611  | -1.709560350696  |

|                      |                  |                  |
|----------------------|------------------|------------------|
| F <sub>3,3,1,1</sub> | -0.504640714053  | -0.516067587661  |
| F <sub>3,3,2,1</sub> | 0.008449010775   | 0.043699888089   |
| F <sub>3,3,2,2</sub> | -0.395518452866  | -0.393401454111  |
| F <sub>3,3,3,1</sub> | 2.688497580756   | 2.675027224990   |
| F <sub>3,3,3,2</sub> | 2.272035516115   | 2.257307516993   |
| F <sub>3,3,3,3</sub> | 94.974455283432  | 94.362999624223  |
| F <sub>4,1,1,1</sub> | -0.193665155425  | -0.170627856322  |
| F <sub>4,2,1,1</sub> | -0.004150666313  | 0.020449240556   |
| F <sub>4,2,2,1</sub> | -0.023198677878  | -0.002943688922  |
| F <sub>4,2,2,2</sub> | 0.043243583419   | 0.072255299422   |
| F <sub>4,3,1,1</sub> | 0.216669256366   | 0.214098484549   |
| F <sub>4,3,2,1</sub> | -0.046650006136  | -0.010027571203  |
| F <sub>4,3,2,2</sub> | -0.104412334715  | -0.085707215977  |
| F <sub>4,3,3,1</sub> | 0.022193207692   | 0.060983636943   |
| F <sub>4,3,3,2</sub> | 0.023004743677   | 0.048252398597   |
| F <sub>4,3,3,3</sub> | 1.880991225775   | 1.866781346408   |
| F <sub>4,4,1,1</sub> | 0.153650391918   | 0.173330689848   |
| F <sub>4,4,2,1</sub> | 0.003316883940   | -0.005428992781  |
| F <sub>4,4,2,2</sub> | 0.050025109767   | 0.055747545226   |
| F <sub>4,4,3,1</sub> | -0.222439988247  | -0.168599985438  |
| F <sub>4,4,3,2</sub> | 0.033018940146   | 0.024209366734   |
| F <sub>4,4,3,3</sub> | -0.834397159175  | -0.833932040346  |
| F <sub>4,4,4,1</sub> | -0.045262727487  | -0.026332088587  |
| F <sub>4,4,4,2</sub> | -0.031745208345  | -0.059945505991  |
| F <sub>4,4,4,3</sub> | -0.235121676304  | -0.228854501629  |
| F <sub>4,4,4,4</sub> | 182.596846694293 | 182.121064896824 |
| F <sub>5,1,1,1</sub> | -0.766789001659  | -0.805204707844  |
| F <sub>5,2,1,1</sub> | 0.116487060737   | 0.114956651216   |
| F <sub>5,2,2,1</sub> | 0.009545103303   | 0.021011304200   |
| F <sub>5,2,2,2</sub> | 0.161164374322   | 0.118876169281   |
| F <sub>5,3,1,1</sub> | -0.089797427628  | -0.031415971240  |
| F <sub>5,3,2,1</sub> | -0.009591591039  | 0.041854210552   |
| F <sub>5,3,2,2</sub> | 0.080310053111   | 0.141730916912   |
| F <sub>5,3,3,1</sub> | 0.114778559064   | 0.099936386644   |
| F <sub>5,3,3,2</sub> | -0.529761884195  | -0.513902869341  |
| F <sub>5,3,3,3</sub> | 0.381739429514   | 0.448441566073   |
| F <sub>5,4,1,1</sub> | 0.033779171518   | 0.056539381320   |
| F <sub>5,4,2,1</sub> | -0.008283645960  | -0.018311217078  |
| F <sub>5,4,2,2</sub> | 0.068807156872   | 0.089026218530   |
| F <sub>5,4,3,1</sub> | 0.017003273573   | 0.019183179722   |
| F <sub>5,4,3,2</sub> | -0.067577111084  | -0.002179906831  |
| F <sub>5,4,3,3</sub> | -0.402002893520  | -0.392546338698  |
| F <sub>5,4,4,1</sub> | -0.029170033849  | -0.043812913117  |
| F <sub>5,4,4,2</sub> | -0.060396784074  | -0.066461412802  |
| F <sub>5,4,4,3</sub> | 0.103977578298   | 0.100823408237   |
| F <sub>5,4,4,4</sub> | 0.202235531300   | 0.209649468098   |
| F <sub>5,5,1,1</sub> | -0.445039426665  | -0.460814918868  |
| F <sub>5,5,2,1</sub> | 0.518621951006   | 0.499312873195   |
| F <sub>5,5,2,2</sub> | -0.776062270068  | -0.819553992560  |
| F <sub>5,5,3,1</sub> | 0.046373656278   | 0.065634118872   |
| F <sub>5,5,3,2</sub> | 0.456394197870   | 0.464226671388   |
| F <sub>5,5,3,3</sub> | 0.276479933569   | 0.254274148227   |

|                      |                 |                 |
|----------------------|-----------------|-----------------|
| F <sub>5,5,4,1</sub> | -0.048062074704 | 0.007270731137  |
| F <sub>5,5,4,2</sub> | 0.005316355515  | 0.018605663592  |
| F <sub>5,5,4,3</sub> | 0.238094631276  | 0.275933099330  |
| F <sub>5,5,4,4</sub> | -0.206554608903 | -0.210995543767 |
| F <sub>5,5,5,1</sub> | 0.321814270756  | 0.307757265189  |
| F <sub>5,5,5,2</sub> | -0.297544274492 | -0.328300071205 |
| F <sub>5,5,5,3</sub> | -0.415290778472 | -0.363890183850 |
| F <sub>5,5,5,4</sub> | -0.058509449522 | -0.038494263496 |
| F <sub>5,5,5,5</sub> | 0.075809974786  | 0.075248814438  |
| F <sub>6,1,1,1</sub> | -0.925434598869 | -0.875598163022 |
| F <sub>6,2,1,1</sub> | 0.047813559690  | 0.023945694222  |
| F <sub>6,2,2,1</sub> | -0.127581367511 | -0.092060503745 |
| F <sub>6,2,2,2</sub> | 0.693441132017  | 0.648097953181  |
| F <sub>6,3,1,1</sub> | -0.782031523729 | -0.805427718030 |
| F <sub>6,3,2,1</sub> | 0.004359813613  | -0.030518695403 |
| F <sub>6,3,2,2</sub> | 0.278424633910  | 0.239582244038  |
| F <sub>6,3,3,1</sub> | 2.035932559643  | 2.018587565048  |
| F <sub>6,3,3,2</sub> | -0.298679515683 | -0.349902108347 |
| F <sub>6,3,3,3</sub> | -5.326292131635 | -5.343199978555 |
| F <sub>6,4,1,1</sub> | 0.129297337565  | 0.087321025633  |
| F <sub>6,4,2,1</sub> | -0.004795795076 | -0.010027571242 |
| F <sub>6,4,2,2</sub> | 0.004531926933  | 0.052243208883  |
| F <sub>6,4,3,1</sub> | 0.196627595670  | 0.082400477795  |
| F <sub>6,4,3,2</sub> | 0.014387384866  | -0.000871962945 |
| F <sub>6,4,3,3</sub> | -0.324970329559 | -0.325740181087 |
| F <sub>6,4,4,1</sub> | -0.013927252841 | -0.025940819618 |
| F <sub>6,4,4,2</sub> | 0.001823758994  | -0.026428841891 |
| F <sub>6,4,4,3</sub> | -0.012561789473 | -0.023401714684 |
| F <sub>6,4,4,4</sub> | 0.097150956571  | 0.131104029960  |
| F <sub>6,5,1,1</sub> | 0.043460085083  | 0.022112317150  |
| F <sub>6,5,2,1</sub> | -0.146053757638 | -0.107687397025 |
| F <sub>6,5,2,2</sub> | -0.370846771284 | -0.362497996967 |
| F <sub>6,5,3,1</sub> | -0.107251415133 | -0.098967768420 |
| F <sub>6,5,3,2</sub> | 0.319574341946  | 0.358376682882  |
| F <sub>6,5,3,3</sub> | 0.633753926850  | 0.635724963168  |
| F <sub>6,5,4,1</sub> | -0.008283646351 | 0.027466825831  |
| F <sub>6,5,4,2</sub> | -0.085888328702 | -0.029646732896 |
| F <sub>6,5,4,3</sub> | 0.269872464521  | 0.190087876256  |
| F <sub>6,5,4,4</sub> | -0.235269026882 | -0.210377837098 |
| F <sub>6,5,5,1</sub> | 0.141680722020  | 0.113523391274  |
| F <sub>6,5,5,2</sub> | -0.398880491764 | -0.436301150695 |
| F <sub>6,5,5,3</sub> | -0.613518494872 | -0.658090934635 |
| F <sub>6,5,5,4</sub> | -0.142306595473 | -0.084032106712 |
| F <sub>6,5,5,5</sub> | -0.000718393614 | -0.011094366107 |
| F <sub>6,6,1,1</sub> | -1.252906571287 | -1.227696713856 |
| F <sub>6,6,2,1</sub> | -0.046808514537 | -0.054856814407 |
| F <sub>6,6,2,2</sub> | -0.143718092718 | -0.155577431474 |
| F <sub>6,6,3,1</sub> | 1.061089151461  | 1.031569517456  |
| F <sub>6,6,3,2</sub> | -0.147103657916 | -0.128508677892 |
| F <sub>6,6,3,3</sub> | 7.467967491478  | 7.363569053932  |
| F <sub>6,6,4,1</sub> | 0.094740512925  | 0.115394110886  |
| F <sub>6,6,4,2</sub> | 0.000084582251  | 0.000468839512  |

|                      |                 |                 |
|----------------------|-----------------|-----------------|
| F <sub>6,6,4,3</sub> | -0.107551402810 | -0.089444198851 |
| F <sub>6,6,4,4</sub> | -0.200478721574 | -0.166006683999 |
| F <sub>6,6,5,1</sub> | -0.026030963817 | -0.050240513049 |
| F <sub>6,6,5,2</sub> | -0.063336564859 | -0.080313166605 |
| F <sub>6,6,5,3</sub> | -0.139075782067 | -0.121352703871 |
| F <sub>6,6,5,4</sub> | -0.007825906935 | -0.010975451819 |
| F <sub>6,6,5,5</sub> | 0.055767398390  | 0.044984861867  |
| F <sub>6,6,6,1</sub> | 0.238945052650  | 0.232300801717  |
| F <sub>6,6,6,2</sub> | 0.199966491319  | 0.183763733929  |
| F <sub>6,6,6,3</sub> | -5.743709120831 | -5.712237095744 |
| F <sub>6,6,6,4</sub> | -0.144692127283 | -0.138698126477 |
| F <sub>6,6,6,5</sub> | -0.676855171020 | -0.705176723602 |
| F <sub>6,6,6,6</sub> | 12.767172385577 | 12.581054251814 |
| F <sub>7,1,1,1</sub> | -0.147188704168 | -0.152963094627 |
| F <sub>7,2,1,1</sub> | -0.070821808243 | -0.032767706345 |
| F <sub>7,2,2,1</sub> | 0.047164475382  | 0.028098624222  |
| F <sub>7,2,2,2</sub> | -0.372264480314 | -0.346514444487 |
| F <sub>7,3,1,1</sub> | -0.082541852553 | -0.042438359774 |
| F <sub>7,3,2,1</sub> | -0.049701876023 | -0.017875235738 |
| F <sub>7,3,2,2</sub> | 0.106101123100  | 0.126373625295  |
| F <sub>7,3,3,1</sub> | -0.035946054155 | -0.019037150814 |
| F <sub>7,3,3,2</sub> | -0.054279433841 | -0.029479157453 |
| F <sub>7,3,3,3</sub> | 0.273819573486  | 0.344018920002  |
| F <sub>7,4,1,1</sub> | 0.109213149529  | 0.132171741826  |
| F <sub>7,4,2,1</sub> | 0.073244868936  | -0.008719627558 |
| F <sub>7,4,2,2</sub> | 0.014692381969  | -0.000266923867 |
| F <sub>7,4,3,1</sub> | -0.057113557656 | 0.019183180161  |
| F <sub>7,4,3,2</sub> | -0.058421503449 | -0.026594862773 |
| F <sub>7,4,3,3</sub> | 0.366467065117  | 0.366804482750  |
| F <sub>7,4,4,1</sub> | -0.096485178917 | -0.133588155492 |
| F <sub>7,4,4,2</sub> | -0.076601734006 | -0.048662383455 |
| F <sub>7,4,4,3</sub> | -0.208503265222 | -0.195106574895 |
| F <sub>7,4,4,4</sub> | -0.556600809868 | -0.555544739846 |
| F <sub>7,5,1,1</sub> | 0.077387982126  | 0.017124421161  |
| F <sub>7,5,2,1</sub> | 0.045778044027  | -0.021799065768 |
| F <sub>7,5,2,2</sub> | 0.072554867763  | 0.076766642200  |
| F <sub>7,5,3,1</sub> | 0.000871961346  | -0.017439263180 |
| F <sub>7,5,3,2</sub> | -0.128178524420 | -0.072808887186 |
| F <sub>7,5,3,3</sub> | 0.352629361207  | 0.372785426060  |
| F <sub>7,5,4,1</sub> | 0.009591589518  | 0.003487850207  |
| F <sub>7,5,4,2</sub> | 0.047521969103  | 0.005667760377  |
| F <sub>7,5,4,3</sub> | -0.101147672531 | -0.127742542388 |
| F <sub>7,5,4,4</sub> | 0.082519947621  | 0.079357601128  |
| F <sub>7,5,5,1</sub> | -0.041426931857 | -0.045893637014 |
| F <sub>7,5,5,2</sub> | 0.033265643632  | 0.083925822436  |
| F <sub>7,5,5,3</sub> | 0.008839839001  | 0.031653562486  |
| F <sub>7,5,5,4</sub> | -0.061093666214 | -0.107941869511 |
| F <sub>7,5,5,5</sub> | 0.098455845834  | 0.061581980089  |
| F <sub>7,6,1,1</sub> | -0.130889883218 | -0.118939026775 |
| F <sub>7,6,2,1</sub> | -0.027030843701 | -0.007847665048 |
| F <sub>7,6,2,2</sub> | -0.014545139086 | 0.025657319943  |
| F <sub>7,6,3,1</sub> | 0.070628979927  | -0.033134583903 |

|          |                 |                 |
|----------|-----------------|-----------------|
| F7,6,3,2 | -0.069321037079 | -0.006103737881 |
| F7,6,3,3 | 0.318445020618  | 0.301247305876  |
| F7,6,4,1 | 0.085888330270  | 0.071936923920  |
| F7,6,4,2 | 0.052753746631  | 0.018311217302  |
| F7,6,4,3 | -0.090684125929 | -0.104199548388 |
| F7,6,4,4 | -0.114596596194 | -0.088794019129 |
| F7,6,5,1 | -0.054933652473 | -0.054933646416 |
| F7,6,5,2 | 0.010463545842  | 0.061037404687  |
| F7,6,5,3 | 0.015259363988  | 0.062345355345  |
| F7,6,5,4 | -0.064961219654 | -0.102891597238 |
| F7,6,5,5 | 0.028305606075  | 0.051816176676  |
| F7,6,6,1 | -0.017659751960 | -0.016446178770 |
| F7,6,6,2 | -0.034149552696 | -0.013335396870 |
| F7,6,6,3 | 0.275062578800  | 0.274806581367  |
| F7,6,6,4 | -0.153123055126 | -0.132605951361 |
| F7,6,6,5 | 0.097717181169  | 0.107808537581  |
| F7,6,6,6 | 0.177210039290  | 0.167525580546  |
| F7,7,1,1 | -0.089761796852 | -0.093209272154 |
| F7,7,2,1 | 0.024792085741  | 0.030246748064  |
| F7,7,2,2 | -0.127314799889 | -0.139118832288 |
| F7,7,3,1 | 0.071536008012  | 0.138779335895  |
| F7,7,3,2 | 0.142537444157  | 0.181660924743  |
| F7,7,3,3 | 0.663196653066  | 0.656899662436  |
| F7,7,4,1 | -0.110394953520 | -0.050926552402 |
| F7,7,4,2 | 0.009152990348  | -0.004713110281 |
| F7,7,4,3 | 0.106054559098  | 0.064370026289  |
| F7,7,4,4 | -0.252747763878 | -0.277272394419 |
| F7,7,5,1 | 0.026336613245  | 0.031923303472  |
| F7,7,5,2 | 0.063969986062  | 0.062240280516  |
| F7,7,5,3 | -0.132199721860 | -0.142279816550 |
| F7,7,5,4 | -0.061439155236 | -0.039974437230 |
| F7,7,5,5 | 0.132894128514  | 0.105756609082  |
| F7,7,6,1 | -0.021750004924 | -0.012437847762 |
| F7,7,6,2 | 0.025640793030  | 0.042381480301  |
| F7,7,6,3 | 0.127550167256  | 0.095683482977  |
| F7,7,6,4 | -0.125814042169 | -0.129224689756 |
| F7,7,6,5 | 0.144258976279  | 0.175428307221  |
| F7,7,6,6 | 0.169124044285  | 0.176813381445  |
| F7,7,7,1 | 0.185451032397  | 0.170000636992  |
| F7,7,7,2 | -0.057682837902 | -0.053141183763 |
| F7,7,7,3 | 0.873617304181  | 0.914113798521  |
| F7,7,7,4 | 0.054898283872  | 0.033452010398  |
| F7,7,7,5 | 0.063183528480  | 0.068839027544  |
| F7,7,7,6 | 0.271494502757  | 0.237901445639  |
| F7,7,7,7 | -0.062330880441 | -0.099204275316 |
| F8,1,1,1 | -0.122555564744 | -0.106174519080 |
| F8,2,1,1 | 0.119602433688  | 0.106860193825  |
| F8,2,2,1 | -0.000126877100 | 0.019364694458  |
| F8,2,2,2 | 0.877159674496  | 0.802467204772  |
| F8,3,1,1 | -0.074053726901 | -0.067734338358 |
| F8,3,2,1 | 0.009591590297  | 0.064089260854  |
| F8,3,2,2 | 0.421619715656  | 0.374824118760  |

|                      |                 |                 |
|----------------------|-----------------|-----------------|
| F <sub>8,3,3,1</sub> | -0.398140493839 | -0.359914181379 |
| F <sub>8,3,3,2</sub> | -1.413557179150 | -1.459882440424 |
| F <sub>8,3,3,3</sub> | 7.265574113310  | 7.258476239907  |
| F <sub>8,4,1,1</sub> | -0.032365003438 | -0.016971711509 |
| F <sub>8,4,2,1</sub> | -0.028774770151 | 0.014823366322  |
| F <sub>8,4,2,2</sub> | 0.079445532596  | 0.062302157438  |
| F <sub>8,4,3,1</sub> | 0.013079441286  | 0.027030844692  |
| F <sub>8,4,3,2</sub> | 0.062781316466  | 0.047521968919  |
| F <sub>8,4,3,3</sub> | -0.726746295687 | -0.755897842351 |
| F <sub>8,4,4,1</sub> | 0.026281136606  | 0.032219914340  |
| F <sub>8,4,4,2</sub> | -0.038048427023 | -0.066984264867 |
| F <sub>8,4,4,3</sub> | 0.192019471002  | 0.191961078130  |
| F <sub>8,4,4,4</sub> | 0.132113336314  | 0.178352017323  |
| F <sub>8,5,1,1</sub> | -0.138315886934 | -0.119826234715 |
| F <sub>8,5,2,1</sub> | 0.102891603214  | 0.105943473641  |
| F <sub>8,5,2,2</sub> | -0.371852419032 | -0.399053613864 |
| F <sub>8,5,3,1</sub> | 0.241097692179  | 0.200551428516  |
| F <sub>8,5,3,2</sub> | 0.381483692273  | 0.362300515044  |
| F <sub>8,5,3,3</sub> | 0.059744226216  | 0.054964921979  |
| F <sub>8,5,4,1</sub> | 0.044906080374  | -0.004359813789 |
| F <sub>8,5,4,2</sub> | -0.039674304464 | 0.012207478386  |
| F <sub>8,5,4,3</sub> | 0.202295353097  | 0.192267782306  |
| F <sub>8,5,4,4</sub> | -0.088638929918 | -0.083403107129 |
| F <sub>8,5,5,1</sub> | 0.077652197246  | 0.082694101770  |
| F <sub>8,5,5,2</sub> | -0.265057697745 | -0.289309844054 |
| F <sub>8,5,5,3</sub> | 0.016929362189  | 0.024594059121  |
| F <sub>8,5,5,4</sub> | -0.063656007486 | -0.049657857602 |
| F <sub>8,5,5,5</sub> | -0.504779448640 | -0.497011593253 |
| F <sub>8,6,1,1</sub> | 0.057825216082  | 0.043556199281  |
| F <sub>8,6,2,1</sub> | 0.047521970029  | 0.033134585875  |
| F <sub>8,6,2,2</sub> | -0.324742198770 | -0.353460888896 |
| F <sub>8,6,3,1</sub> | -0.257229008329 | -0.360992570520 |
| F <sub>8,6,3,2</sub> | 0.097223841277  | 0.176572452732  |
| F <sub>8,6,3,3</sub> | -3.370233977128 | -3.341452937985 |
| F <sub>8,6,4,1</sub> | -0.043162156228 | 0.010899535756  |
| F <sub>8,6,4,2</sub> | -0.018311218385 | -0.003051868135 |
| F <sub>8,6,4,3</sub> | -0.010899531179 | 0.074116832104  |
| F <sub>8,6,4,4</sub> | -0.054633060072 | -0.072938017645 |
| F <sub>8,6,5,1</sub> | 0.173084599639  | 0.169596744952  |
| F <sub>8,6,5,2</sub> | -0.156953293589 | -0.143001893011 |
| F <sub>8,6,5,3</sub> | -0.674027185877 | -0.609065967794 |
| F <sub>8,6,5,4</sub> | 0.017003277172  | -0.033134586930 |
| F <sub>8,6,5,5</sub> | 0.330176547492  | 0.311423137745  |
| F <sub>8,6,6,1</sub> | -0.355140274879 | -0.332958074699 |
| F <sub>8,6,6,2</sub> | 0.114968575026  | 0.057581842847  |
| F <sub>8,6,6,3</sub> | 3.788242906820  | 3.775628241577  |
| F <sub>8,6,6,4</sub> | -0.002170179439 | 0.028420178506  |
| F <sub>8,6,6,5</sub> | -0.036669945134 | -0.041299755070 |
| F <sub>8,6,6,6</sub> | -5.509199371861 | -5.554787462038 |
| F <sub>8,7,1,1</sub> | -0.003276222737 | -0.031869661325 |
| F <sub>8,7,2,1</sub> | -0.011771496399 | 0.000435979804  |
| F <sub>8,7,2,2</sub> | 0.132749966893  | 0.119253943427  |

|                      |                 |                 |
|----------------------|-----------------|-----------------|
| F <sub>8,7,3,1</sub> | -0.019183177159 | 0.005667755245  |
| F <sub>8,7,3,2</sub> | -0.109867302579 | -0.162621049591 |
| F <sub>8,7,3,3</sub> | 0.271616255421  | 0.323093913036  |
| F <sub>8,7,4,1</sub> | 0.069757017600  | 0.040110286548  |
| F <sub>8,7,4,2</sub> | 0.010027571410  | -0.019619161380 |
| F <sub>8,7,4,3</sub> | -0.075424775769 | -0.042726175141 |
| F <sub>8,7,4,4</sub> | -0.098594201959 | -0.116923393290 |
| F <sub>8,7,5,1</sub> | -0.149977579975 | -0.011771493431 |
| F <sub>8,7,5,2</sub> | 0.067577117271  | 0.033570571986  |
| F <sub>8,7,5,3</sub> | -0.035314534786 | -0.015259332534 |
| F <sub>8,7,5,4</sub> | -0.068013101086 | -0.058421507238 |
| F <sub>8,7,5,5</sub> | 0.034392556023  | -0.016323811871 |
| F <sub>8,7,6,1</sub> | -0.064525231143 | -0.029210730207 |
| F <sub>8,7,6,2</sub> | 0.025286928463  | 0.013079449695  |
| F <sub>8,7,6,3</sub> | 0.165672883700  | 0.130794411715  |
| F <sub>8,7,6,4</sub> | 0.034878501637  | 0.019619174134  |
| F <sub>8,7,6,5</sub> | -0.054061727718 | -0.021799106700 |
| F <sub>8,7,6,6</sub> | 0.066181839465  | 0.050892072369  |
| F <sub>8,7,7,1</sub> | -0.035204692646 | -0.018553228565 |
| F <sub>8,7,7,2</sub> | 0.047553402296  | 0.048463603828  |
| F <sub>8,7,7,3</sub> | -0.079584455901 | -0.018754944369 |
| F <sub>8,7,7,4</sub> | -0.102072189202 | -0.113933965723 |
| F <sub>8,7,7,5</sub> | 0.082664381461  | 0.066325360009  |
| F <sub>8,7,7,6</sub> | 0.051297976345  | 0.063536623109  |
| F <sub>8,7,7,7</sub> | 0.476611850500  | 0.485001795093  |
| F <sub>8,8,1,1</sub> | 0.183847998400  | 0.124433878373  |
| F <sub>8,8,2,1</sub> | -0.068981277766 | -0.066715511340 |
| F <sub>8,8,2,2</sub> | -0.860665085455 | -0.857571793147 |
| F <sub>8,8,3,1</sub> | -0.377599537351 | -0.340551035664 |
| F <sub>8,8,3,2</sub> | 1.043698474587  | 1.002900335352  |
| F <sub>8,8,3,3</sub> | 9.587850392670  | 9.551639839644  |
| F <sub>8,8,4,1</sub> | -0.054639164363 | 0.020076125650  |
| F <sub>8,8,4,2</sub> | 0.030478711597  | -0.007304088830 |
| F <sub>8,8,4,3</sub> | -0.333115707067 | -0.323877607605 |
| F <sub>8,8,4,4</sub> | -0.423250125401 | -0.445514293355 |
| F <sub>8,8,5,1</sub> | -0.140930755299 | -0.107989345453 |
| F <sub>8,8,5,2</sub> | -0.164085634882 | -0.193817796580 |
| F <sub>8,8,5,3</sub> | -0.154820928749 | -0.171478100145 |
| F <sub>8,8,5,4</sub> | -0.217645048962 | -0.208786419966 |
| F <sub>8,8,5,5</sub> | -0.423626827018 | -0.402533869682 |
| F <sub>8,8,6,1</sub> | 0.030667409182  | -0.008700866115 |
| F <sub>8,8,6,2</sub> | 0.112787240140  | 0.131421331211  |
| F <sub>8,8,6,3</sub> | -3.767382779409 | -3.787091814991 |
| F <sub>8,8,6,4</sub> | 0.228651263200  | 0.212883658729  |
| F <sub>8,8,6,5</sub> | 0.599622839937  | 0.608420055561  |
| F <sub>8,8,6,6</sub> | 4.321707034427  | 4.317720334065  |
| F <sub>8,8,7,1</sub> | -0.028472046176 | -0.018588806153 |
| F <sub>8,8,7,2</sub> | 0.013384882189  | 0.033003139191  |
| F <sub>8,8,7,3</sub> | 0.463207142978  | 0.618808360677  |
| F <sub>8,8,7,4</sub> | -0.564141418444 | -0.555981252332 |
| F <sub>8,8,7,5</sub> | 0.010421148405  | -0.025227968278 |
| F <sub>8,8,7,6</sub> | -0.007569468446 | -0.005035730276 |



|                      |                 |                 |
|----------------------|-----------------|-----------------|
| F <sub>8,8,7,7</sub> | 0.468036971170  | 0.557003473144  |
| F <sub>8,8,8,1</sub> | -0.194787832023 | -0.200909049803 |
| F <sub>8,8,8,2</sub> | -0.586218811145 | -0.578552992816 |
| F <sub>8,8,8,3</sub> | 12.273002933024 | 12.472307067795 |
| F <sub>8,8,8,4</sub> | -1.449964587818 | -1.411489192926 |
| F <sub>8,8,8,5</sub> | 0.462592904446  | 0.460516005392  |
| F <sub>8,8,8,6</sub> | -6.022082193542 | -6.168030411039 |
| F <sub>8,8,8,7</sub> | 1.103131152150  | 1.324730028083  |
| F <sub>8,8,8,8</sub> | 26.238540145520 | 27.024672470690 |
| F <sub>9,1,1,1</sub> | 0.040390862402  | 0.030510811661  |
| F <sub>9,2,1,1</sub> | 0.004918477535  | -0.001141595425 |
| F <sub>9,2,2,1</sub> | 0.026457223654  | 0.000665671216  |
| F <sub>9,2,2,2</sub> | 0.005665628824  | -0.003482855057 |
| F <sub>9,3,1,1</sub> | 0.002430735121  | -0.001310117392 |
| F <sub>9,3,2,1</sub> | 0.013951403140  | 0.011335514728  |
| F <sub>9,3,2,2</sub> | 0.058933923474  | 0.091865329198  |
| F <sub>9,3,3,1</sub> | 0.232041113590  | 0.242921825643  |
| F <sub>9,3,3,2</sub> | -0.225678296858 | -0.263826601683 |
| F <sub>9,3,3,3</sub> | -0.715359097663 | -0.699724421341 |
| F <sub>9,4,1,1</sub> | -0.077637977307 | -0.050813837132 |
| F <sub>9,4,2,1</sub> | -0.043598136624 | 0.017875236099  |
| F <sub>9,4,2,2</sub> | -0.045450099208 | -0.021316588450 |
| F <sub>9,4,3,1</sub> | -0.093300012224 | -0.049265894146 |
| F <sub>9,4,3,2</sub> | -0.003923832084 | -0.010899534403 |
| F <sub>9,4,3,3</sub> | 0.250020715603  | 0.243560778867  |
| F <sub>9,4,4,1</sub> | 0.068809714171  | 0.046755134488  |
| F <sub>9,4,4,2</sub> | 0.047968546717  | 0.007179445712  |
| F <sub>9,4,4,3</sub> | -0.081776005752 | -0.044609296139 |
| F <sub>9,4,4,4</sub> | -0.073366846828 | -0.056414107900 |
| F <sub>9,5,1,1</sub> | -0.044404007015 | -0.013859532099 |
| F <sub>9,5,2,1</sub> | -0.010027571482 | -0.007411684300 |
| F <sub>9,5,2,2</sub> | 0.010654196812  | 0.006071051028  |
| F <sub>9,5,3,1</sub> | 0.088068235922  | 0.049701877612  |
| F <sub>9,5,3,2</sub> | -0.024850936219 | -0.015259348051 |
| F <sub>9,5,3,3</sub> | -0.026715604433 | -0.020835204145 |
| F <sub>9,5,4,1</sub> | -0.020491123995 | -0.016131309638 |
| F <sub>9,5,4,2</sub> | 0.008283645758  | -0.000871962873 |
| F <sub>9,5,4,3</sub> | 0.024414957845  | -0.014823366189 |
| F <sub>9,5,4,4</sub> | 0.017878976859  | 0.005273785606  |
| F <sub>9,5,5,1</sub> | -0.008620596893 | -0.004067846404 |
| F <sub>9,5,5,2</sub> | -0.099467920628 | -0.080714427325 |
| F <sub>9,5,5,3</sub> | 0.045729912757  | 0.075871039274  |
| F <sub>9,5,5,4</sub> | -0.031498688302 | -0.025402356686 |
| F <sub>9,5,5,5</sub> | -0.077305034293 | -0.075785157528 |
| F <sub>9,6,1,1</sub> | -0.006606266039 | 0.001646019053  |
| F <sub>9,6,2,1</sub> | 0.027466825815  | 0.022671030798  |
| F <sub>9,6,2,2</sub> | -0.099432926924 | -0.084753029208 |
| F <sub>9,6,3,1</sub> | 0.104199545856  | 0.100275714002  |
| F <sub>9,6,3,2</sub> | 0.100275714091  | 0.039238322889  |
| F <sub>9,6,3,3</sub> | -0.043926262165 | -0.029395832704 |
| F <sub>9,6,4,1</sub> | -0.039238322950 | -0.060165427616 |
| F <sub>9,6,4,2</sub> | 0.015259347766  | 0.018311217529  |

|                      |                 |                 |
|----------------------|-----------------|-----------------|
| F <sub>9,6,4,3</sub> | 0.224094422506  | 0.143873850868  |
| F <sub>9,6,4,4</sub> | 0.144019044146  | 0.131344247872  |
| F <sub>9,6,5,1</sub> | 0.083272440444  | 0.052753744240  |
| F <sub>9,6,5,2</sub> | -0.101583656828 | -0.020055147006 |
| F <sub>9,6,5,3</sub> | -0.180496284995 | -0.190087879719 |
| F <sub>9,6,5,4</sub> | 0.061909354551  | 0.009591587477  |
| F <sub>9,6,5,5</sub> | 0.078198337310  | 0.057401817690  |
| F <sub>9,6,6,1</sub> | -0.027903430640 | -0.030127075617 |
| F <sub>9,6,6,2</sub> | 0.036608092684  | -0.005526322354 |
| F <sub>9,6,6,3</sub> | 0.167156953211  | 0.229336481573  |
| F <sub>9,6,6,4</sub> | 0.010455174341  | -0.017330474631 |
| F <sub>9,6,6,5</sub> | 0.156247076279  | 0.172790308123  |
| F <sub>9,6,6,6</sub> | -0.371995357933 | -0.414883518300 |
| F <sub>9,7,1,1</sub> | 0.080448039185  | 0.050170131419  |
| F <sub>9,7,2,1</sub> | -0.044034117888 | -0.005667755160 |
| F <sub>9,7,2,2</sub> | 0.087722757314  | 0.022317152734  |
| F <sub>9,7,3,1</sub> | 0.001307947190  | 0.030518697144  |
| F <sub>9,7,3,2</sub> | -0.059729446721 | 0.009591589015  |
| F <sub>9,7,3,3</sub> | -0.273469248620 | -0.247443391460 |
| F <sub>9,7,4,1</sub> | 0.049701877021  | 0.022235047710  |
| F <sub>9,7,4,2</sub> | -0.025286918459 | -0.016567292554 |
| F <sub>9,7,4,3</sub> | 0.146053753017  | 0.177444416742  |
| F <sub>9,7,4,4</sub> | -0.064447105546 | -0.114655817549 |
| F <sub>9,7,5,1</sub> | -0.034006543801 | -0.008283654466 |
| F <sub>9,7,5,2</sub> | -0.050137857031 | 0.007847659351  |
| F <sub>9,7,5,3</sub> | -0.039674329989 | -0.008283634198 |
| F <sub>9,7,5,4</sub> | -0.067141134132 | -0.007847664049 |
| F <sub>9,7,5,5</sub> | 0.007252991315  | -0.024270635273 |
| F <sub>9,7,6,1</sub> | -0.017875235849 | 0.046214022940  |
| F <sub>9,7,6,2</sub> | -0.016131311801 | -0.021363083533 |
| F <sub>9,7,6,3</sub> | 0.023107012854  | -0.068449073911 |
| F <sub>9,7,6,4</sub> | 0.108559355971  | 0.174392549050  |
| F <sub>9,7,6,5</sub> | -0.065833171135 | -0.047086024368 |
| F <sub>9,7,6,6</sub> | -0.147408308109 | -0.142508737634 |
| F <sub>9,7,7,1</sub> | -0.079722930688 | -0.066450539545 |
| F <sub>9,7,7,2</sub> | 0.033369372270  | 0.001847991312  |
| F <sub>9,7,7,3</sub> | -0.049089795064 | -0.001310123152 |
| F <sub>9,7,7,4</sub> | 0.089529741816  | 0.064484552700  |
| F <sub>9,7,7,5</sub> | 0.041197830703  | 0.008960950744  |
| F <sub>9,7,7,6</sub> | -0.095646115652 | -0.121524948387 |
| F <sub>9,7,7,7</sub> | 0.140277093827  | 0.119762589322  |
| F <sub>9,8,1,1</sub> | -0.001942968177 | 0.003919708566  |
| F <sub>9,8,2,1</sub> | -0.003051869666 | 0.021799068382  |
| F <sub>9,8,2,2</sub> | -0.159195219612 | -0.137587387496 |
| F <sub>9,8,3,1</sub> | -0.034006546445 | -0.026594863279 |
| F <sub>9,8,3,2</sub> | 0.230634141941  | 0.174392545936  |
| F <sub>9,8,3,3</sub> | -0.035426339517 | 0.029779631261  |
| F <sub>9,8,4,1</sub> | -0.009591589703 | -0.020491124300 |
| F <sub>9,8,4,2</sub> | -0.036186453251 | 0.007411683159  |
| F <sub>9,8,4,3</sub> | -0.175264510342 | -0.234121993101 |
| F <sub>9,8,4,4</sub> | -0.090335075586 | -0.054128094519 |
| F <sub>9,8,5,1</sub> | -0.019183181509 | -0.029646731920 |

|                      |                 |                 |
|----------------------|-----------------|-----------------|
| F <sub>9,8,5,2</sub> | -0.008283646366 | 0.017875234360  |
| F <sub>9,8,5,3</sub> | 0.004359816444  | 0.052317762322  |
| F <sub>9,8,5,4</sub> | -0.058421503555 | -0.004359812576 |
| F <sub>9,8,5,5</sub> | 0.014001492836  | -0.017007398946 |
| F <sub>9,8,6,1</sub> | -0.050137858628 | -0.017875243538 |
| F <sub>9,8,6,2</sub> | -0.044034119243 | 0.008283641546  |
| F <sub>9,8,6,3</sub> | -0.144745808274 | -0.191831799910 |
| F <sub>9,8,6,4</sub> | 0.061473373878  | 0.091556084745  |
| F <sub>9,8,6,5</sub> | 0.210579002913  | 0.162621058492  |
| F <sub>9,8,6,6</sub> | -0.102492730922 | -0.082280038085 |
| F <sub>9,8,7,1</sub> | -0.030518694808 | -0.003051866353 |
| F <sub>9,8,7,2</sub> | -0.065833188697 | -0.020491124200 |
| F <sub>9,8,7,3</sub> | 0.040546259918  | 0.163057036963  |
| F <sub>9,8,7,4</sub> | -0.034442528162 | -0.093300015031 |
| F <sub>9,8,7,5</sub> | 0.058421488290  | 0.023978976241  |
| F <sub>9,8,7,6</sub> | -0.032262638734 | -0.026158917307 |
| F <sub>9,8,7,7</sub> | 0.052318027575  | 0.113737188313  |
| F <sub>9,8,8,1</sub> | -0.059543224598 | -0.028881402682 |
| F <sub>9,8,8,2</sub> | 0.026044889460  | 0.003990538184  |
| F <sub>9,8,8,3</sub> | -0.059055090711 | 0.034365615490  |
| F <sub>9,8,8,4</sub> | -0.339725053720 | -0.362577886942 |
| F <sub>9,8,8,5</sub> | 0.009707513173  | 0.019623816829  |
| F <sub>9,8,8,6</sub> | -0.166598969786 | -0.198008532250 |
| F <sub>9,8,8,7</sub> | 0.373228173986  | 0.420181401510  |
| F <sub>9,8,8,8</sub> | 1.246625726024  | 1.557081698639  |
| F <sub>9,9,1,1</sub> | -0.044983755283 | -0.020711619194 |
| F <sub>9,9,2,1</sub> | 0.010840681891  | 0.026958202211  |
| F <sub>9,9,2,2</sub> | -0.140749304999 | -0.137277153102 |
| F <sub>9,9,3,1</sub> | -0.045954739379 | -0.025847229124 |
| F <sub>9,9,3,2</sub> | 0.094006486580  | 0.128446280260  |
| F <sub>9,9,3,3</sub> | 0.066989948587  | 0.040600455984  |
| F <sub>9,9,4,1</sub> | -0.026636700690 | 0.011854763054  |
| F <sub>9,9,4,2</sub> | 0.004270003799  | 0.020698373636  |
| F <sub>9,9,4,3</sub> | -0.084880371541 | -0.082368844029 |
| F <sub>9,9,4,4</sub> | 0.042643156465  | 0.026180856865  |
| F <sub>9,9,5,1</sub> | 0.050452613308  | 0.032521214196  |
| F <sub>9,9,5,2</sub> | 0.019225843209  | 0.029902913931  |
| F <sub>9,9,5,3</sub> | -0.111023490470 | -0.103016570822 |
| F <sub>9,9,5,4</sub> | 0.006374622011  | 0.027939005352  |
| F <sub>9,9,5,5</sub> | 0.107358077835  | 0.105956525126  |
| F <sub>9,9,6,1</sub> | -0.003712833534 | -0.054690670167 |
| F <sub>9,9,6,2</sub> | 0.014081057776  | 0.027333891731  |
| F <sub>9,9,6,3</sub> | 0.181910822602  | 0.139730054955  |
| F <sub>9,9,6,4</sub> | 0.005229496041  | 0.005107397333  |
| F <sub>9,9,6,5</sub> | 0.122684141039  | 0.118925085106  |
| F <sub>9,9,6,6</sub> | -0.241487110320 | -0.230957604031 |
| F <sub>9,9,7,1</sub> | 0.038943110900  | -0.002146032723 |
| F <sub>9,9,7,2</sub> | -0.045061533746 | -0.003569409531 |
| F <sub>9,9,7,3</sub> | 0.112080253541  | 0.102556582446  |
| F <sub>9,9,7,4</sub> | -0.004789742469 | -0.017805836311 |
| F <sub>9,9,7,5</sub> | -0.020770110558 | 0.009251853149  |
| F <sub>9,9,7,6</sub> | 0.071554942113  | 0.081163952299  |

|                          |                 |                 |
|--------------------------|-----------------|-----------------|
| F <sub>9,9,7,7</sub>     | 0.050088686257  | 0.024041744004  |
| F <sub>9,9,8,1</sub>     | 0.037940524132  | 0.005562769537  |
| F <sub>9,9,8,2</sub>     | 0.026925253223  | 0.025593268957  |
| F <sub>9,9,8,3</sub>     | -0.103949594926 | -0.084276716428 |
| F <sub>9,9,8,4</sub>     | -0.032165696787 | -0.042482849279 |
| F <sub>9,9,8,5</sub>     | 0.060342127616  | 0.062239589472  |
| F <sub>9,9,8,6</sub>     | -0.081539321164 | -0.087387676563 |
| F <sub>9,9,8,7</sub>     | 0.192691174128  | 0.207795524351  |
| F <sub>9,9,8,8</sub>     | 0.185952474586  | 0.314034553213  |
| F <sub>9,9,9,1</sub>     | -0.016258586870 | -0.041890221349 |
| F <sub>9,9,9,2</sub>     | -0.012617460342 | -0.004889253915 |
| F <sub>9,9,9,3</sub>     | 0.071770068668  | 0.119470503185  |
| F <sub>9,9,9,4</sub>     | -0.072410505020 | -0.062377212474 |
| F <sub>9,9,9,5</sub>     | 0.010791324472  | 0.017036671104  |
| F <sub>9,9,9,6</sub>     | -0.184889037902 | -0.189579610984 |
| F <sub>9,9,9,7</sub>     | 0.135720451342  | 0.102042020913  |
| F <sub>9,9,9,8</sub>     | -0.015920051180 | 0.073001123700  |
| F <sub>9,9,9,9</sub>     | -0.140699123713 | -0.107714448399 |
| F <sub>10,10,10,10</sub> | 76.477791228573 | 76.062564746118 |
| F <sub>10,10,1,1</sub>   | -0.945382826202 | -0.935561982121 |
| F <sub>10,10,2,1</sub>   | 0.090891235322  | 0.107711445482  |
| F <sub>10,10,2,2</sub>   | -0.535511744687 | -0.540131712169 |
| F <sub>10,10,3,1</sub>   | 2.549819592707  | 2.539025012864  |
| F <sub>10,10,3,2</sub>   | 2.179962194310  | 2.136126206591  |
| F <sub>10,10,3,3</sub>   | 86.564339174755 | 86.099985866295 |
| F <sub>10,10,4,1</sub>   | -0.026262256840 | 0.027475704916  |
| F <sub>10,10,4,2</sub>   | -0.119461864085 | -0.069925835951 |
| F <sub>10,10,4,3</sub>   | 1.959718562480  | 1.945541018965  |
| F <sub>10,10,4,4</sub>   | -0.642535569014 | -0.656349755117 |
| F <sub>10,10,5,1</sub>   | 0.144191223777  | 0.116031538711  |
| F <sub>10,10,5,2</sub>   | -0.329523779033 | -0.362656725748 |
| F <sub>10,10,5,3</sub>   | 0.007713031621  | 0.037618559631  |
| F <sub>10,10,5,4</sub>   | -0.153449004124 | -0.192954537213 |
| F <sub>10,10,5,5</sub>   | 0.763555095057  | 0.740804369527  |
| F <sub>10,10,6,1</sub>   | 0.883488104462  | 0.909455302174  |
| F <sub>10,10,6,2</sub>   | -0.359134331079 | -0.390310728713 |
| F <sub>10,10,6,3</sub>   | 1.189796856396  | 1.198206040811  |
| F <sub>10,10,6,4</sub>   | -0.363580191719 | -0.294574818263 |
| F <sub>10,10,6,5</sub>   | 1.136430417481  | 1.150158848907  |
| F <sub>10,10,6,6</sub>   | 0.718770406562  | 0.677902568886  |
| F <sub>10,10,7,1</sub>   | 0.027519723666  | 0.031333389200  |
| F <sub>10,10,7,2</sub>   | 0.011849289572  | 0.038005568594  |
| F <sub>10,10,7,3</sub>   | 0.712255007317  | 0.781281643154  |
| F <sub>10,10,7,4</sub>   | 0.218714231014  | 0.205697126018  |
| F <sub>10,10,7,5</sub>   | 0.242798189777  | 0.189036867521  |
| F <sub>10,10,7,6</sub>   | 0.023896115297  | 0.057077747561  |
| F <sub>10,10,7,7</sub>   | 0.048542078486  | 0.009779441206  |
| F <sub>10,10,8,1</sub>   | 0.105251320140  | 0.111191521217  |
| F <sub>10,10,8,2</sub>   | -0.646383516429 | -0.635674355776 |
| F <sub>10,10,8,3</sub>   | -1.075321799141 | -1.050840276533 |
| F <sub>10,10,8,4</sub>   | -0.104115463832 | -0.156533828715 |
| F <sub>10,10,8,5</sub>   | -0.408770498278 | -0.378597740209 |

|                          |                 |                 |
|--------------------------|-----------------|-----------------|
| F <sub>10,10,8,6</sub>   | 1.796948237315  | 1.741231595734  |
| F <sub>10,10,8,7</sub>   | 0.342850335227  | 0.290351549242  |
| F <sub>10,10,8,8</sub>   | -1.420271503334 | -1.445328573193 |
| F <sub>10,10,9,1</sub>   | 0.243166462906  | 0.259006790831  |
| F <sub>10,10,9,2</sub>   | -0.078421827310 | -0.059437188194 |
| F <sub>10,10,9,3</sub>   | -0.170792200560 | -0.131977033130 |
| F <sub>10,10,9,4</sub>   | 0.219844566936  | 0.183509521028  |
| F <sub>10,10,9,5</sub>   | -0.404444821951 | -0.356690298985 |
| F <sub>10,10,9,6</sub>   | 0.218853831899  | 0.185474083475  |
| F <sub>10,10,9,7</sub>   | -0.184319996984 | -0.236123356036 |
| F <sub>10,10,9,8</sub>   | 0.262698145378  | 0.293153787668  |
| F <sub>10,10,9,9</sub>   | 0.589800750161  | 0.608819755631  |
| F <sub>11,10,10,10</sub> | 2.560795046031  | 2.557373009197  |
| F <sub>11,10,1,1</sub>   | 0.172856805473  | 0.183324959946  |
| F <sub>11,10,2,1</sub>   | -0.022671031002 | -0.023542993719 |
| F <sub>11,10,2,2</sub>   | -0.051096977144 | -0.001812417268 |
| F <sub>11,10,3,1</sub>   | -0.089376179897 | 0.009155608670  |
| F <sub>11,10,3,2</sub>   | -0.081964496675 | -0.051881782481 |
| F <sub>11,10,3,3</sub>   | 1.320190992006  | 1.330321612454  |
| F <sub>11,10,4,1</sub>   | -0.071064962536 | -0.088068235783 |
| F <sub>11,10,4,2</sub>   | 0.068449074345  | 0.020927105544  |
| F <sub>11,10,4,3</sub>   | -0.731140749606 | -0.696262240394 |
| F <sub>11,10,4,4</sub>   | -0.240734807129 | -0.238648746021 |
| F <sub>11,10,5,1</sub>   | 0.070628981172  | 0.043162155157  |
| F <sub>11,10,5,2</sub>   | -0.042726173796 | -0.008719627301 |
| F <sub>11,10,5,3</sub>   | -0.187471987041 | -0.214938813095 |
| F <sub>11,10,5,4</sub>   | 0.039238322873  | 0.045342062016  |
| F <sub>11,10,5,5</sub>   | 0.188439623326  | 0.168923510974  |
| F <sub>11,10,6,1</sub>   | 0.033570565123  | 0.109867304057  |
| F <sub>11,10,6,2</sub>   | -0.014823366425 | -0.017439254608 |
| F <sub>11,10,6,3</sub>   | -0.281207980622 | -0.172212639288 |
| F <sub>11,10,6,4</sub>   | 0.124254689117  | 0.011771496872  |
| F <sub>11,10,6,5</sub>   | 0.161313105179  | 0.114227117713  |
| F <sub>11,10,6,6</sub>   | -0.290577321919 | -0.273470999567 |
| F <sub>11,10,7,1</sub>   | 0.038366360153  | 0.003923832314  |
| F <sub>11,10,7,2</sub>   | 0.020055142780  | -0.057985521567 |
| F <sub>11,10,7,3</sub>   | 0.194883670254  | 0.292543496121  |
| F <sub>11,10,7,4</sub>   | 0.015259347829  | 0.034878509226  |
| F <sub>11,10,7,5</sub>   | -0.088940198496 | -0.090684123980 |
| F <sub>11,10,7,6</sub>   | -0.085888328960 | -0.125562633249 |
| F <sub>11,10,7,7</sub>   | 0.096349107745  | 0.138039153585  |
| F <sub>11,10,8,1</sub>   | 0.070628981182  | -0.014823366415 |
| F <sub>11,10,8,2</sub>   | 0.050573838377  | -0.019183180083 |
| F <sub>11,10,8,3</sub>   | -0.596422507743 | -0.540180911617 |
| F <sub>11,10,8,4</sub>   | 0.275976204244  | 0.249381340939  |
| F <sub>11,10,8,5</sub>   | 0.075860757565  | 0.131230390956  |
| F <sub>11,10,8,6</sub>   | 0.168288807006  | 0.132102353684  |
| F <sub>11,10,8,7</sub>   | 0.140821980994  | 0.048393931540  |
| F <sub>11,10,8,8</sub>   | -0.390824908058 | -0.370849547129 |
| F <sub>11,10,9,1</sub>   | -0.008719627309 | -0.058857484339 |
| F <sub>11,10,9,2</sub>   | -0.057113558861 | -0.001743925458 |
| F <sub>11,10,9,3</sub>   | 0.167852825671  | 0.189651893907  |

|                          |                  |                  |
|--------------------------|------------------|------------------|
| F <sub>11,10,9,4</sub>   | 0.020927105533   | 0.071500943899   |
| F <sub>11,10,9,5</sub>   | 0.030954676955   | 0.032262621040   |
| F <sub>11,10,9,6</sub>   | 0.014387385056   | 0.100711695391   |
| F <sub>11,10,9,7</sub>   | 0.183984136171   | 0.171776657850   |
| F <sub>11,10,9,8</sub>   | -0.210578999427  | -0.157389272861  |
| F <sub>11,10,9,9</sub>   | -0.139137085044  | -0.109542006264  |
| F <sub>11,11,10,10</sub> | -0.592698121216  | -0.583048123495  |
| F <sub>11,11,1,1</sub>   | 0.139090668641   | 0.165459647442   |
| F <sub>11,11,11,10</sub> | -0.191046668175  | -0.180153983507  |
| F <sub>11,11,11,11</sub> | 182.649087511157 | 182.167526166773 |
| F <sub>11,11,2,1</sub>   | 0.012923234691   | -0.007460297932  |
| F <sub>11,11,2,2</sub>   | 0.045042287940   | 0.041997087243   |
| F <sub>11,11,3,1</sub>   | -0.174555297501  | -0.146692860985  |
| F <sub>11,11,3,2</sub>   | 0.080566592525   | 0.049446728672   |
| F <sub>11,11,3,3</sub>   | -0.671354746089  | -0.657010257704  |
| F <sub>11,11,4,1</sub>   | -0.047988662251  | -0.021281543745  |
| F <sub>11,11,4,2</sub>   | -0.037279377044  | -0.058154338751  |
| F <sub>11,11,4,3</sub>   | -0.182112556981  | -0.238289639866  |
| F <sub>11,11,4,4</sub>   | 182.551044807626 | 182.066154697585 |
| F <sub>11,11,5,1</sub>   | -0.032744550601  | -0.037288574851  |
| F <sub>11,11,5,2</sub>   | -0.070478188109  | -0.055580513613  |
| F <sub>11,11,5,3</sub>   | 0.062501365581   | 0.082233986089   |
| F <sub>11,11,5,4</sub>   | 0.162637490261   | 0.190491073061   |
| F <sub>11,11,5,5</sub>   | -0.208865844292  | -0.178530393817  |
| F <sub>11,11,6,1</sub>   | 0.005348971023   | -0.004652296793  |
| F <sub>11,11,6,2</sub>   | 0.021114082376   | -0.022269795746  |
| F <sub>11,11,6,3</sub>   | 0.060241804863   | 0.002963127928   |
| F <sub>11,11,6,4</sub>   | 0.056124536858   | 0.073538779514   |
| F <sub>11,11,6,5</sub>   | -0.179651993715  | -0.181546225128  |
| F <sub>11,11,6,6</sub>   | -0.152259127357  | -0.157367492027  |
| F <sub>11,11,7,1</sub>   | -0.138007870092  | -0.095973140407  |
| F <sub>11,11,7,2</sub>   | -0.056091137218  | -0.060235540634  |
| F <sub>11,11,7,3</sub>   | -0.084137612308  | -0.084504684667  |
| F <sub>11,11,7,4</sub>   | -0.686237752885  | -0.636546196212  |
| F <sub>11,11,7,5</sub>   | 0.048205145039   | 0.036951992941   |
| F <sub>11,11,7,6</sub>   | -0.094254832306  | -0.053152917889  |
| F <sub>11,11,7,7</sub>   | -0.201012454634  | -0.222007959115  |
| F <sub>11,11,8,1</sub>   | 0.005702241744   | 0.023704593885   |
| F <sub>11,11,8,2</sub>   | -0.060642552126  | -0.062068205912  |
| F <sub>11,11,8,3</sub>   | 0.214165751978   | 0.153703572283   |
| F <sub>11,11,8,4</sub>   | 0.114238536536   | 0.104836999964   |
| F <sub>11,11,8,5</sub>   | -0.104964150458  | -0.107344666159  |
| F <sub>11,11,8,6</sub>   | -0.061277004968  | -0.007998305950  |
| F <sub>11,11,8,7</sub>   | -0.158891552459  | -0.157837288118  |
| F <sub>11,11,8,8</sub>   | -0.670200390542  | -0.688450942679  |
| F <sub>11,11,9,1</sub>   | 0.014058253146   | 0.045375919491   |
| F <sub>11,11,9,2</sub>   | 0.006013228116   | 0.026160485054   |
| F <sub>11,11,9,3</sub>   | -0.088609700500  | -0.021092439311  |
| F <sub>11,11,9,4</sub>   | -0.063761310463  | -0.084909674047  |
| F <sub>11,11,9,5</sub>   | -0.009881673969  | -0.004490023518  |
| F <sub>11,11,9,6</sub>   | 0.152512003438   | 0.136789501564   |
| F <sub>11,11,9,7</sub>   | -0.016394532345  | -0.057879662708  |

|                          |                 |                 |
|--------------------------|-----------------|-----------------|
| F <sub>11,11,9,8</sub>   | -0.110937884913 | -0.102499300748 |
| F <sub>11,11,9,9</sub>   | 0.012078825260  | 0.024534302778  |
| F <sub>12,10,10,10</sub> | 0.856744689735  | 0.887663120480  |
| F <sub>12,10,1,1</sub>   | -0.308473595602 | -0.300702135014 |
| F <sub>12,10,2,1</sub>   | -0.044906080608 | -0.054061689295 |
| F <sub>12,10,2,2</sub>   | 0.002901482869  | 0.001728293352  |
| F <sub>12,10,3,1</sub>   | 0.431621551692  | 0.514893992420  |
| F <sub>12,10,3,2</sub>   | -0.373636030073 | -0.324370135786 |
| F <sub>12,10,3,3</sub>   | 0.964704502294  | 0.966062817738  |
| F <sub>12,10,4,1</sub>   | 0.107687397226  | 0.133846279135  |
| F <sub>12,10,4,2</sub>   | -0.081528515322 | -0.015259347775 |
| F <sub>12,10,4,3</sub>   | -0.352708924524 | -0.334833688551 |
| F <sub>12,10,4,4</sub>   | -0.066855535609 | -0.060602977933 |
| F <sub>12,10,5,1</sub>   | 0.100711695418  | -0.010899534076 |
| F <sub>12,10,5,2</sub>   | 0.476527632267  | 0.514893992354  |
| F <sub>12,10,5,3</sub>   | 0.957851059276  | 0.847983755505  |
| F <sub>12,10,5,4</sub>   | 0.134718241872  | 0.115971043136  |
| F <sub>12,10,5,5</sub>   | -0.959407838069 | -0.958780846283 |
| F <sub>12,10,6,1</sub>   | 0.587702880441  | 0.578547271784  |
| F <sub>12,10,6,2</sub>   | 0.161313105159  | 0.255049098710  |
| F <sub>12,10,6,3</sub>   | 1.273501567969  | 1.192409034085  |
| F <sub>12,10,6,4</sub>   | -0.015695329149 | -0.007411683198 |
| F <sub>12,10,6,5</sub>   | -0.714573457784 | -0.699314109975 |
| F <sub>12,10,6,6</sub>   | 0.990188316352  | 0.983052026893  |
| F <sub>12,10,7,1</sub>   | -0.160441142318 | -0.071500944061 |
| F <sub>12,10,7,2</sub>   | -0.021363086736 | -0.010899534214 |
| F <sub>12,10,7,3</sub>   | 0.541052874571  | 0.414618278405  |
| F <sub>12,10,7,4</sub>   | -0.157389273189 | -0.149541608254 |
| F <sub>12,10,7,5</sub>   | -0.071500944237 | 0.021363086817  |
| F <sub>12,10,7,6</sub>   | 0.230198160811  | 0.269436484147  |
| F <sub>12,10,7,7</sub>   | 0.108999658134  | 0.100681999357  |
| F <sub>12,10,8,1</sub>   | -0.160877123796 | -0.134718241889 |
| F <sub>12,10,8,2</sub>   | 0.070628981176  | 0.163057030619  |
| F <sub>12,10,8,3</sub>   | 0.306930881171  | 0.323934154406  |
| F <sub>12,10,8,4</sub>   | -0.052753745198 | 0.006539720488  |
| F <sub>12,10,8,5</sub>   | -0.404154725629 | -0.405026688368 |
| F <sub>12,10,8,6</sub>   | -0.140821980985 | -0.107687397227 |
| F <sub>12,10,8,7</sub>   | -0.129050484123 | -0.078040664385 |
| F <sub>12,10,8,8</sub>   | 0.563207856380  | 0.593762859811  |
| F <sub>12,10,9,1</sub>   | -0.006975701828 | 0.031826639774  |
| F <sub>12,10,9,2</sub>   | -0.097223844492 | -0.066269167531 |
| F <sub>12,10,9,3</sub>   | -0.121638801133 | -0.102019639481 |
| F <sub>12,10,9,4</sub>   | 0.068013093020  | 0.088940198504  |
| F <sub>12,10,9,5</sub>   | 0.032262620945  | 0.011335515473  |
| F <sub>12,10,9,6</sub>   | -0.125562633232 | -0.146053757391 |
| F <sub>12,10,9,7</sub>   | 0.003923832016  | -0.098967769187 |
| F <sub>12,10,9,8</sub>   | 0.032698602403  | -0.035314490574 |
| F <sub>12,10,9,9</sub>   | -0.035014832560 | -0.041194775051 |
| F <sub>12,11,10,10</sub> | -0.345823073175 | -0.357079422190 |
| F <sub>12,11,1,1</sub>   | 0.073652530505  | 0.009624099539  |
| F <sub>12,11,11,10</sub> | -0.112883767298 | -0.106686530231 |
| F <sub>12,11,11,11</sub> | 0.174796365676  | 0.122352972029  |

|                          |                 |                 |
|--------------------------|-----------------|-----------------|
| F <sub>12,11,2,1</sub>   | 0.038802341515  | -0.004795795020 |
| F <sub>12,11,2,2</sub>   | 0.053850538132  | 0.052097122862  |
| F <sub>12,11,3,1</sub>   | 0.120766838189  | 0.148669645560  |
| F <sub>12,11,3,2</sub>   | -0.133410297776 | -0.043162155166 |
| F <sub>12,11,3,3</sub>   | -0.333863470792 | -0.322453061671 |
| F <sub>12,11,4,1</sub>   | 0.050573838375  | 0.003487850930  |
| F <sub>12,11,4,2</sub>   | -0.052753745190 | -0.037494397409 |
| F <sub>12,11,4,3</sub>   | -0.023978975097 | -0.006539720467 |
| F <sub>12,11,4,4</sub>   | 0.103918075579  | 0.142274945863  |
| F <sub>12,11,5,1</sub>   | -0.027466826020 | 0.028774770097  |
| F <sub>12,11,5,2</sub>   | 0.023107012368  | -0.018747198700 |
| F <sub>12,11,5,3</sub>   | 0.179188341211  | 0.163493011972  |
| F <sub>12,11,5,4</sub>   | -0.150413571029 | -0.124254689110 |
| F <sub>12,11,5,5</sub>   | -0.077618939291 | -0.096024029981 |
| F <sub>12,11,6,1</sub>   | 0.137770111430  | 0.146489738733  |
| F <sub>12,11,6,2</sub>   | 0.095915900363  | 0.008283645941  |
| F <sub>12,11,6,3</sub>   | -0.096351881715 | -0.075860757568 |
| F <sub>12,11,6,4</sub>   | -0.138642074158 | -0.178752359774 |
| F <sub>12,11,6,5</sub>   | -0.066705148876 | -0.119894875441 |
| F <sub>12,11,6,6</sub>   | 0.090022927609  | 0.099689411306  |
| F <sub>12,11,7,1</sub>   | 0.090248142581  | 0.084580384895  |
| F <sub>12,11,7,2</sub>   | 0.077168701627  | -0.003051869516 |
| F <sub>12,11,7,3</sub>   | -0.115971043230 | -0.145617776012 |
| F <sub>12,11,7,4</sub>   | 0.013951403776  | -0.064525242083 |
| F <sub>12,11,7,5</sub>   | -0.052753745132 | -0.066269167488 |
| F <sub>12,11,7,6</sub>   | -0.170032732463 | -0.174392546207 |
| F <sub>12,11,7,7</sub>   | -0.195249524584 | -0.136528105258 |
| F <sub>12,11,8,1</sub>   | 0.048829912921  | 0.004359813662  |
| F <sub>12,11,8,2</sub>   | 0.087632254429  | -0.032262621033 |
| F <sub>12,11,8,3</sub>   | 0.178752359773  | 0.226274328588  |
| F <sub>12,11,8,4</sub>   | -0.105943471766 | -0.027466826013 |
| F <sub>12,11,8,5</sub>   | -0.133410297784 | -0.028774770108 |
| F <sub>12,11,8,6</sub>   | -0.108123378592 | -0.142565906460 |
| F <sub>12,11,8,7</sub>   | 0.034442527865  | 0.065833186153  |
| F <sub>12,11,8,8</sub>   | 0.444377330248  | 0.471201790113  |
| F <sub>12,11,9,1</sub>   | -0.019619161436 | -0.067141130276 |
| F <sub>12,11,9,2</sub>   | -0.056677577478 | -0.012207478238 |
| F <sub>12,11,9,3</sub>   | 0.009591590094  | 0.109867304051  |
| F <sub>12,11,9,4</sub>   | -0.054933652032 | 0.033134583771  |
| F <sub>12,11,9,5</sub>   | 0.006539720507  | 0.000871962741  |
| F <sub>12,11,9,6</sub>   | 0.058421502958  | 0.052317763842  |
| F <sub>12,11,9,7</sub>   | 0.071936925337  | 0.113355154827  |
| F <sub>12,11,9,8</sub>   | 0.104635527660  | 0.070628981182  |
| F <sub>12,11,9,9</sub>   | 0.033542245015  | 0.043996307776  |
| F <sub>12,12,10,10</sub> | 1.023353139109  | 1.027327767922  |
| F <sub>12,12,1,1</sub>   | -0.636210895576 | -0.619805219487 |
| F <sub>12,12,11,10</sub> | 0.045516768275  | 0.083005294722  |
| F <sub>12,12,11,11</sub> | -0.131440708092 | -0.103606632577 |
| F <sub>12,12,12,10</sub> | 0.388864021151  | 0.428066097904  |
| F <sub>12,12,12,11</sub> | -0.100743857194 | -0.089606635075 |
| F <sub>12,12,12,12</sub> | 1.638323067464  | 1.623362926989  |
| F <sub>12,12,2,1</sub>   | 0.073233989627  | 0.075666815110  |



|                          |                 |                 |
|--------------------------|-----------------|-----------------|
| F <sub>12,12,2,2</sub>   | -0.327028073581 | -0.320215836732 |
| F <sub>12,12,3,1</sub>   | 0.617404856635  | 0.642942055145  |
| F <sub>12,12,3,2</sub>   | 0.364172472418  | 0.369166396442  |
| F <sub>12,12,3,3</sub>   | -0.053241108036 | -0.083429044691 |
| F <sub>12,12,4,1</sub>   | 0.056646866900  | 0.113800014860  |
| F <sub>12,12,4,2</sub>   | 0.000796329797  | -0.024729101228 |
| F <sub>12,12,4,3</sub>   | -0.018038239423 | 0.020973945291  |
| F <sub>12,12,4,4</sub>   | -0.150401476679 | -0.151339583188 |
| F <sub>12,12,5,1</sub>   | 0.066295890519  | 0.093796489617  |
| F <sub>12,12,5,2</sub>   | -0.292102040217 | -0.260201109084 |
| F <sub>12,12,5,3</sub>   | -0.790932175987 | -0.734359110681 |
| F <sub>12,12,5,4</sub>   | -0.114719331539 | -0.101543776691 |
| F <sub>12,12,5,5</sub>   | 0.981602207601  | 0.998458446835  |
| F <sub>12,12,6,1</sub>   | -0.159088666776 | -0.114737585207 |
| F <sub>12,12,6,2</sub>   | -0.117673317236 | -0.154590134211 |
| F <sub>12,12,6,3</sub>   | 1.900737133220  | 1.912198189885  |
| F <sub>12,12,6,4</sub>   | -0.031435056279 | -0.048535999510 |
| F <sub>12,12,6,5</sub>   | 0.447870510295  | 0.489792401325  |
| F <sub>12,12,6,6</sub>   | 0.171449908825  | 0.182143321311  |
| F <sub>12,12,7,1</sub>   | -0.048268368720 | -0.038496323724 |
| F <sub>12,12,7,2</sub>   | 0.016863068387  | 0.032919091360  |
| F <sub>12,12,7,3</sub>   | 0.091926183620  | 0.117572678386  |
| F <sub>12,12,7,4</sub>   | -0.139807776779 | -0.155150130131 |
| F <sub>12,12,7,5</sub>   | 0.041883471855  | -0.029607740495 |
| F <sub>12,12,7,6</sub>   | 0.162683515574  | 0.142893472615  |
| F <sub>12,12,7,7</sub>   | 0.137360647342  | 0.140267529994  |
| F <sub>12,12,8,1</sub>   | 0.320335460338  | 0.290089208101  |
| F <sub>12,12,8,2</sub>   | 0.232990897351  | 0.206714305400  |
| F <sub>12,12,8,3</sub>   | -2.089123800470 | -2.086659336883 |
| F <sub>12,12,8,4</sub>   | 0.086335729362  | 0.086525782464  |
| F <sub>12,12,8,5</sub>   | 0.042978860038  | 0.057746941824  |
| F <sub>12,12,8,6</sub>   | 1.126844879174  | 1.137106750902  |
| F <sub>12,12,8,7</sub>   | -0.009567935247 | -0.046734715168 |
| F <sub>12,12,8,8</sub>   | -5.203220710720 | -5.180635655183 |
| F <sub>12,12,9,1</sub>   | 0.051334664717  | 0.052278963156  |
| F <sub>12,12,9,2</sub>   | -0.010626721977 | -0.003268254246 |
| F <sub>12,12,9,3</sub>   | -0.036073974854 | -0.010265568291 |
| F <sub>12,12,9,4</sub>   | 0.112302494797  | 0.049517914734  |
| F <sub>12,12,9,5</sub>   | -0.000798759333 | -0.024908477874 |
| F <sub>12,12,9,6</sub>   | -0.060610226527 | -0.082654461008 |
| F <sub>12,12,9,7</sub>   | -0.071328115581 | -0.087235694288 |
| F <sub>12,12,9,8</sub>   | 0.106689480391  | 0.163086012759  |
| F <sub>12,12,9,9</sub>   | 0.104005182406  | 0.150798709800  |
| F <sub>13,10,10,10</sub> | -0.449425957007 | -0.434027152107 |
| F <sub>13,10,1,1</sub>   | -0.190900334429 | -0.130788938832 |
| F <sub>13,10,2,1</sub>   | -0.054497670651 | -0.001743925442 |
| F <sub>13,10,2,2</sub>   | 0.127169167613  | 0.115160806907  |
| F <sub>13,10,3,1</sub>   | 0.030082714250  | 0.039238322886  |
| F <sub>13,10,3,2</sub>   | -0.014387385080 | 0.030082714203  |
| F <sub>13,10,3,3</sub>   | 0.919305116262  | 0.891432659752  |
| F <sub>13,10,4,1</sub>   | 0.037930378785  | -0.012643459596 |
| F <sub>13,10,4,2</sub>   | -0.034878509246 | -0.028774770101 |

|                          |                 |                 |
|--------------------------|-----------------|-----------------|
| F <sub>13,10,4,3</sub>   | 0.269000502380  | 0.257229005527  |
| F <sub>13,10,4,4</sub>   | 0.042785677504  | 0.066837194981  |
| F <sub>13,10,5,1</sub>   | -0.032698602347 | -0.028338788677 |
| F <sub>13,10,5,2</sub>   | -0.094607956273 | -0.069757018511 |
| F <sub>13,10,5,3</sub>   | 0.218426663700  | 0.239789750909  |
| F <sub>13,10,5,4</sub>   | 0.048829912885  | -0.052317763875 |
| F <sub>13,10,5,5</sub>   | 0.078845555219  | 0.089339458695  |
| F <sub>13,10,6,1</sub>   | -0.053625707908 | -0.110739266746 |
| F <sub>13,10,6,2</sub>   | -0.051445801099 | -0.039674304222 |
| F <sub>13,10,6,3</sub>   | 0.439905197494  | 0.339193502202  |
| F <sub>13,10,6,4</sub>   | -0.125998614569 | -0.106379453127 |
| F <sub>13,10,6,5</sub>   | 0.142129925009  | 0.102455620792  |
| F <sub>13,10,6,6</sub>   | 0.232029717593  | 0.205451141118  |
| F <sub>13,10,7,1</sub>   | 0.180060304012  | 0.213194887525  |
| F <sub>13,10,7,2</sub>   | 0.267256577128  | 0.178752359680  |
| F <sub>13,10,7,3</sub>   | 0.621709427140  | 0.686234668992  |
| F <sub>13,10,7,4</sub>   | 0.113791135933  | 0.138206092892  |
| F <sub>13,10,7,5</sub>   | -0.171340677159 | -0.165672919044 |
| F <sub>13,10,7,6</sub>   | -0.016131310568 | -0.053625707458 |
| F <sub>13,10,7,7</sub>   | 0.654059680156  | 0.629112517123  |
| F <sub>13,10,8,1</sub>   | -0.139950018267 | 0.013079440959  |
| F <sub>13,10,8,2</sub>   | -0.085016366237 | -0.031390658300 |
| F <sub>13,10,8,3</sub>   | 0.328293968072  | 0.322190228948  |
| F <sub>13,10,8,4</sub>   | 0.017439254616  | 0.056677577497  |
| F <sub>13,10,8,5</sub>   | -0.040982248341 | -0.084144403516 |
| F <sub>13,10,8,6</sub>   | -0.010463552767 | -0.093300012172 |
| F <sub>13,10,8,7</sub>   | -0.186164042976 | -0.120330856794 |
| F <sub>13,10,8,8</sub>   | 0.293292131057  | 0.291747324044  |
| F <sub>13,10,9,1</sub>   | 0.037930378806  | 0.039674304372  |
| F <sub>13,10,9,2</sub>   | 0.035314490548  | 0.033134583742  |
| F <sub>13,10,9,3</sub>   | -0.105943472024 | -0.161749086523 |
| F <sub>13,10,9,4</sub>   | 0.102891602252  | 0.136026185946  |
| F <sub>13,10,9,5</sub>   | 0.030082714085  | -0.073680850747 |
| F <sub>13,10,9,6</sub>   | -0.231942086362 | -0.228018254071 |
| F <sub>13,10,9,7</sub>   | -0.071064962931 | -0.134282259729 |
| F <sub>13,10,9,8</sub>   | 0.152157496496  | 0.141693943736  |
| F <sub>13,10,9,9</sub>   | 0.097466178390  | 0.062167975448  |
| F <sub>13,11,10,10</sub> | 0.310568020931  | 0.237670303176  |
| F <sub>13,11,1,1</sub>   | 0.164966940658  | 0.137944499664  |
| F <sub>13,11,11,10</sub> | 0.109990299770  | 0.125929729539  |
| F <sub>13,11,11,11</sub> | -0.521041552250 | -0.535169254213 |
| F <sub>13,11,2,1</sub>   | -0.050573838350 | -0.011771496869 |
| F <sub>13,11,2,2</sub>   | 0.038841750859  | 0.025320668288  |
| F <sub>13,11,3,1</sub>   | -0.022235049619 | 0.020055142803  |
| F <sub>13,11,3,2</sub>   | -0.078040664389 | -0.058421502964 |
| F <sub>13,11,3,3</sub>   | 0.180718525386  | 0.190937331448  |
| F <sub>13,11,4,1</sub>   | -0.125562633218 | -0.128614502756 |
| F <sub>13,11,4,2</sub>   | -0.016131310521 | -0.038802341509 |
| F <sub>13,11,4,3</sub>   | -0.182676192055 | -0.084144403513 |
| F <sub>13,11,4,4</sub>   | -0.626381429089 | -0.584153152533 |
| F <sub>13,11,5,1</sub>   | 0.062345335245  | -0.010027571368 |
| F <sub>13,11,5,2</sub>   | -0.002615888198 | -0.011771496890 |

|                          |                 |                 |
|--------------------------|-----------------|-----------------|
| F <sub>13,11,5,3</sub>   | -0.061037391262 | -0.046214024722 |
| F <sub>13,11,5,4</sub>   | 0.055369633389  | 0.058421502929  |
| F <sub>13,11,5,5</sub>   | -0.180217789442 | -0.109692915860 |
| F <sub>13,11,6,1</sub>   | 0.093300012178  | 0.043598136540  |
| F <sub>13,11,6,2</sub>   | 0.030954676930  | -0.000435981353 |
| F <sub>13,11,6,3</sub>   | -0.141693943756 | -0.149105626930 |
| F <sub>13,11,6,4</sub>   | 0.001743925467  | -0.019619161433 |
| F <sub>13,11,6,5</sub>   | 0.003923832257  | -0.117714968643 |
| F <sub>13,11,6,6</sub>   | -0.093809095576 | -0.138720836448 |
| F <sub>13,11,7,1</sub>   | -0.142129925056 | -0.081092533994 |
| F <sub>13,11,7,2</sub>   | 0.045342062051  | -0.004359813665 |
| F <sub>13,11,7,3</sub>   | 0.055369633461  | 0.003923832289  |
| F <sub>13,11,7,4</sub>   | -0.105507490550 | -0.167416844227 |
| F <sub>13,11,7,5</sub>   | -0.047957950355 | -0.032262621062 |
| F <sub>13,11,7,6</sub>   | -0.144745813296 | -0.130358428060 |
| F <sub>13,11,7,7</sub>   | 0.126319302380  | 0.095133942368  |
| F <sub>13,11,8,1</sub>   | -0.045778043352 | 0.039238322871  |
| F <sub>13,11,8,2</sub>   | -0.013951403684 | -0.014823366419 |
| F <sub>13,11,8,3</sub>   | -0.132102353673 | -0.097223844469 |
| F <sub>13,11,8,4</sub>   | -0.024850937826 | -0.085016366225 |
| F <sub>13,11,8,5</sub>   | -0.128614502763 | -0.039674304247 |
| F <sub>13,11,8,6</sub>   | 0.085888328964  | 0.023978975104  |
| F <sub>13,11,8,7</sub>   | -0.092864030819 | -0.115099080439 |
| F <sub>13,11,8,8</sub>   | -0.584189684241 | -0.589103650571 |
| F <sub>13,11,9,1</sub>   | 0.028338788756  | -0.009591589977 |
| F <sub>13,11,9,2</sub>   | -0.107687397248 | -0.021799068264 |
| F <sub>13,11,9,3</sub>   | 0.061909353791  | 0.080220571207  |
| F <sub>13,11,9,4</sub>   | -0.081528515298 | -0.044034117911 |
| F <sub>13,11,9,5</sub>   | 0.060601409749  | 0.024850937802  |
| F <sub>13,11,9,6</sub>   | 0.245021527288  | 0.189215912529  |
| F <sub>13,11,9,7</sub>   | 0.004359813558  | 0.055805615020  |
| F <sub>13,11,9,8</sub>   | -0.105071509040 | -0.159133198327 |
| F <sub>13,11,9,9</sub>   | -0.072488200600 | -0.049499359487 |
| F <sub>13,12,10,10</sub> | 0.486232338676  | 0.490689369228  |
| F <sub>13,12,1,1</sub>   | -0.111083673896 | -0.097693157250 |
| F <sub>13,12,11,10</sub> | -0.233250030438 | -0.154337403318 |
| F <sub>13,12,11,11</sub> | -0.056751310273 | -0.071664308962 |
| F <sub>13,12,12,10</sub> | 0.175823485909  | 0.176690417026  |
| F <sub>13,12,12,11</sub> | -0.141918353193 | -0.137398237096 |
| F <sub>13,12,12,12</sub> | 0.093649972122  | 0.078576707588  |
| F <sub>13,12,2,1</sub>   | -0.014823366425 | -0.016131310513 |
| F <sub>13,12,2,2</sub>   | 0.091830491841  | 0.075405508681  |
| F <sub>13,12,3,1</sub>   | -0.142129925098 | -0.065833186166 |
| F <sub>13,12,3,2</sub>   | -0.086760291690 | -0.046214024719 |
| F <sub>13,12,3,3</sub>   | 0.421207381422  | 0.438198260277  |
| F <sub>13,12,4,1</sub>   | 0.058421502952  | 0.066269167526  |
| F <sub>13,12,4,2</sub>   | 0.042290192442  | 0.004795795016  |
| F <sub>13,12,4,3</sub>   | -0.183984136161 | -0.145181794643 |
| F <sub>13,12,4,4</sub>   | -0.078961692040 | -0.069902861206 |
| F <sub>13,12,5,1</sub>   | 0.019183180064  | -0.015695329168 |
| F <sub>13,12,5,2</sub>   | 0.020491124167  | 0.078476645773  |
| F <sub>13,12,5,3</sub>   | 0.095915900425  | 0.041418229698  |

|                          |                 |                 |
|--------------------------|-----------------|-----------------|
| F <sub>13,12,5,4</sub>   | -0.059293465677 | -0.096787863089 |
| F <sub>13,12,5,5</sub>   | 0.036924967709  | -0.000370865361 |
| F <sub>13,12,6,1</sub>   | -0.068013092987 | -0.027466826023 |
| F <sub>13,12,6,2</sub>   | 0.116407024540  | 0.029210751470  |
| F <sub>13,12,6,3</sub>   | 0.190959838017  | 0.162621049260  |
| F <sub>13,12,6,4</sub>   | -0.127742540034 | -0.150413571024 |
| F <sub>13,12,6,5</sub>   | -0.061909353855 | -0.018311217334 |
| F <sub>13,12,6,6</sub>   | 0.236351282524  | 0.208618911702  |
| F <sub>13,12,7,1</sub>   | 0.115971043148  | 0.006103739140  |
| F <sub>13,12,7,2</sub>   | 0.125126651814  | 0.048829912909  |
| F <sub>13,12,7,3</sub>   | 0.027030844594  | 0.119458894092  |
| F <sub>13,12,7,4</sub>   | -0.169596751029 | -0.132974316440 |
| F <sub>13,12,7,5</sub>   | 0.124690670549  | 0.108123378633  |
| F <sub>13,12,7,6</sub>   | 0.139514036905  | 0.203167316147  |
| F <sub>13,12,7,7</sub>   | 0.230331926761  | 0.231233686976  |
| F <sub>13,12,8,1</sub>   | 0.017875235980  | -0.026594863279 |
| F <sub>13,12,8,2</sub>   | 0.082400478039  | -0.039238322878 |
| F <sub>13,12,8,3</sub>   | 0.046214024721  | 0.040110285607  |
| F <sub>13,12,8,4</sub>   | 0.073244869369  | 0.035314490586  |
| F <sub>13,12,8,5</sub>   | -0.013951403689 | -0.009591590038 |
| F <sub>13,12,8,6</sub>   | -0.070192999813 | -0.084580384870 |
| F <sub>13,12,8,7</sub>   | -0.035314490591 | -0.051009819739 |
| F <sub>13,12,8,8</sub>   | 0.185889955529  | 0.172502777862  |
| F <sub>13,12,9,1</sub>   | -0.014823366418 | 0.012207478209  |
| F <sub>13,12,9,2</sub>   | 0.004359813655  | 0.015259347789  |
| F <sub>13,12,9,3</sub>   | -0.071500943867 | -0.125126651841 |
| F <sub>13,12,9,4</sub>   | 0.196627595740  | 0.112919173622  |
| F <sub>13,12,9,5</sub>   | -0.114663099057 | -0.016567291871 |
| F <sub>13,12,9,6</sub>   | -0.108995341320 | -0.125126651832 |
| F <sub>13,12,9,7</sub>   | -0.134718241828 | -0.117714968743 |
| F <sub>13,12,9,8</sub>   | -0.058857484317 | -0.009155608676 |
| F <sub>13,12,9,9</sub>   | 0.082885841995  | 0.060047713449  |
| F <sub>13,13,10,10</sub> | 0.012048632432  | 0.002841353685  |
| F <sub>13,13,1,1</sub>   | -0.108357573995 | -0.099604448033 |
| F <sub>13,13,11,10</sub> | 0.196864585084  | 0.195862185288  |
| F <sub>13,13,11,11</sub> | -0.076014730248 | -0.084008723444 |
| F <sub>13,13,12,10</sub> | 0.122359320817  | 0.130425049433  |
| F <sub>13,13,12,11</sub> | -0.184821383288 | -0.150299688962 |
| F <sub>13,13,12,12</sub> | 0.230043159526  | 0.242295159844  |
| F <sub>13,13,13,10</sub> | 0.607174881708  | 0.587840504399  |
| F <sub>13,13,13,11</sub> | 0.214604338152  | 0.220241124795  |
| F <sub>13,13,13,12</sub> | 0.285045791510  | 0.251661309602  |
| F <sub>13,13,13,13</sub> | -0.219735195917 | -0.222127996034 |
| F <sub>13,13,2,1</sub>   | -0.003426067166 | 0.032286669090  |
| F <sub>13,13,2,2</sub>   | -0.156838867194 | -0.157632297400 |
| F <sub>13,13,3,1</sub>   | 0.116026286929  | 0.176224003549  |
| F <sub>13,13,3,2</sub>   | 0.187454692491  | 0.208943244785  |
| F <sub>13,13,3,3</sub>   | 0.605172222043  | 0.611651818819  |
| F <sub>13,13,4,1</sub>   | -0.105102219625 | -0.078758421528 |
| F <sub>13,13,4,2</sub>   | -0.001456240543 | -0.001113443980 |
| F <sub>13,13,4,3</sub>   | 0.021490737668  | 0.031800815879  |
| F <sub>13,13,4,4</sub>   | -0.122229698669 | -0.116868934711 |

|                          |                 |                 |
|--------------------------|-----------------|-----------------|
| F <sub>13,13,5,1</sub>   | 0.051835842364  | 0.034139705929  |
| F <sub>13,13,5,2</sub>   | 0.121498948494  | 0.073251971684  |
| F <sub>13,13,5,3</sub>   | -0.182810836021 | -0.170126560295 |
| F <sub>13,13,5,4</sub>   | -0.026142451394 | -0.022994467432 |
| F <sub>13,13,5,5</sub>   | 0.135898570607  | 0.121174851804  |
| F <sub>13,13,6,1</sub>   | 0.010072103026  | -0.011264674044 |
| F <sub>13,13,6,2</sub>   | 0.014429036539  | 0.037604984782  |
| F <sub>13,13,6,3</sub>   | 0.057262593485  | 0.075045380105  |
| F <sub>13,13,6,4</sub>   | -0.059628517971 | -0.069899086375 |
| F <sub>13,13,6,5</sub>   | 0.164337295352  | 0.191871801303  |
| F <sub>13,13,6,6</sub>   | 0.078953305917  | 0.105724691285  |
| F <sub>13,13,7,1</sub>   | 0.158459461548  | 0.176151833620  |
| F <sub>13,13,7,2</sub>   | -0.122142323725 | -0.065830689520 |
| F <sub>13,13,7,3</sub>   | 0.813548007934  | 0.765440987562  |
| F <sub>13,13,7,4</sub>   | 0.151645765571  | 0.157593835990  |
| F <sub>13,13,7,5</sub>   | 0.088097498573  | 0.071757928920  |
| F <sub>13,13,7,6</sub>   | 0.122282575651  | 0.182422454022  |
| F <sub>13,13,7,7</sub>   | -0.291197897018 | -0.289333499554 |
| F <sub>13,13,8,1</sub>   | -0.008830470461 | 0.006919311357  |
| F <sub>13,13,8,2</sub>   | 0.130171958691  | 0.090525271514  |
| F <sub>13,13,8,3</sub>   | -0.191006263005 | -0.173936423713 |
| F <sub>13,13,8,4</sub>   | -0.097357752562 | -0.073334051502 |
| F <sub>13,13,8,5</sub>   | 0.050172552512  | 0.048300678627  |
| F <sub>13,13,8,6</sub>   | -0.037007375711 | 0.034146560649  |
| F <sub>13,13,8,7</sub>   | 0.306373227328  | 0.284465794352  |
| F <sub>13,13,8,8</sub>   | 0.033484499400  | 0.038572281177  |
| F <sub>13,13,9,1</sub>   | -0.078224464010 | -0.084691848644 |
| F <sub>13,13,9,2</sub>   | 0.071265111522  | -0.013223161930 |
| F <sub>13,13,9,3</sub>   | -0.064776082068 | -0.042746180028 |
| F <sub>13,13,9,4</sub>   | 0.025542203084  | 0.089918854672  |
| F <sub>13,13,9,5</sub>   | -0.019618622870 | -0.001365482497 |
| F <sub>13,13,9,6</sub>   | -0.111620046579 | -0.134027599231 |
| F <sub>13,13,9,7</sub>   | 0.010854375008  | -0.009994331833 |
| F <sub>13,13,9,8</sub>   | -0.133245597622 | -0.087821263040 |
| F <sub>13,13,9,9</sub>   | -0.065383522157 | -0.040231450905 |
| F <sub>14,10,10,10</sub> | -0.554218290030 | -0.548444856306 |
| F <sub>14,10,1,1</sub>   | 0.077662176353  | 0.065949700326  |
| F <sub>14,10,2,1</sub>   | 0.159569179686  | 0.066269167513  |
| F <sub>14,10,2,2</sub>   | 0.181341357619  | 0.184817910029  |
| F <sub>14,10,3,1</sub>   | 0.050137856958  | 0.031826639673  |
| F <sub>14,10,3,2</sub>   | -0.541052874322 | -0.552824371203 |
| F <sub>14,10,3,3</sub>   | -0.552795005480 | -0.534973260269 |
| F <sub>14,10,4,1</sub>   | -0.027466826016 | 0.019183180080  |
| F <sub>14,10,4,2</sub>   | -0.019619161401 | -0.058857484338 |
| F <sub>14,10,4,3</sub>   | -0.221478533579 | -0.205347223063 |
| F <sub>14,10,4,4</sub>   | 0.141512350396  | 0.124680609352  |
| F <sub>14,10,5,1</sub>   | 0.158261235544  | 0.112919173511  |
| F <sub>14,10,5,2</sub>   | 0.159569179708  | 0.122074782377  |
| F <sub>14,10,5,3</sub>   | 0.085452347992  | 0.050137857002  |
| F <sub>14,10,5,4</sub>   | 0.042726173826  | 0.021799068304  |
| F <sub>14,10,5,5</sub>   | 0.235515558688  | 0.215983545894  |
| F <sub>14,10,6,1</sub>   | 0.049701875615  | 0.074116832048  |

|                          |                 |                 |
|--------------------------|-----------------|-----------------|
| F <sub>14,10,6,2</sub>   | 0.116843005908  | 0.144309831896  |
| F <sub>14,10,6,3</sub>   | 0.120330856932  | 0.133410297789  |
| F <sub>14,10,6,4</sub>   | 0.035314490594  | 0.035750471951  |
| F <sub>14,10,6,5</sub>   | -0.521433712796 | -0.485683240856 |
| F <sub>14,10,6,6</sub>   | -0.049475615150 | -0.020627760218 |
| F <sub>14,10,7,1</sub>   | 0.065397204564  | -0.010027571272 |
| F <sub>14,10,7,2</sub>   | -0.097659826070 | -0.080656552510 |
| F <sub>14,10,7,3</sub>   | 0.113791136066  | 0.109431322673  |
| F <sub>14,10,7,4</sub>   | 0.081092534490  | 0.032262620903  |
| F <sub>14,10,7,5</sub>   | -0.053189725802 | -0.012207478134 |
| F <sub>14,10,7,6</sub>   | 0.045778043437  | 0.035750471345  |
| F <sub>14,10,7,7</sub>   | -0.185614313584 | -0.204977558686 |
| F <sub>14,10,8,1</sub>   | 0.029646732843  | -0.009155608663 |
| F <sub>14,10,8,2</sub>   | 0.517945861988  | 0.499198663271  |
| F <sub>14,10,8,3</sub>   | 0.782150569357  | 0.715445420457  |
| F <sub>14,10,8,4</sub>   | 0.070628981169  | 0.110303285407  |
| F <sub>14,10,8,5</sub>   | -0.014823366424 | 0.003487850922  |
| F <sub>14,10,8,6</sub>   | -0.073244869372 | -0.098967769936 |
| F <sub>14,10,8,7</sub>   | 0.062345335213  | 0.039674304218  |
| F <sub>14,10,8,8</sub>   | -0.893985583334 | -0.915880334587 |
| F <sub>14,10,9,1</sub>   | -0.012643459612 | -0.010899534277 |
| F <sub>14,10,9,2</sub>   | 0.081528515363  | 0.046214024751  |
| F <sub>14,10,9,3</sub>   | 0.181368248273  | 0.133846279155  |
| F <sub>14,10,9,4</sub>   | -0.067577111675 | -0.039674304212 |
| F <sub>14,10,9,5</sub>   | 0.054497670772  | 0.025286919225  |
| F <sub>14,10,9,6</sub>   | -0.140385999607 | -0.020491124129 |
| F <sub>14,10,9,7</sub>   | -0.041854210622 | 0.026594862381  |
| F <sub>14,10,9,8</sub>   | -0.101147676748 | -0.086324310351 |
| F <sub>14,10,9,9</sub>   | -0.058701542838 | -0.080596294408 |
| F <sub>14,11,10,10</sub> | -0.205382995474 | -0.216747136407 |
| F <sub>14,11,1,1</sub>   | 0.012366048584  | 0.007298770833  |
| F <sub>14,11,11,10</sub> | 0.200975998841  | 0.141399414407  |
| F <sub>14,11,11,11</sub> | 0.091514352356  | 0.074405019157  |
| F <sub>14,11,2,1</sub>   | 0.047521968827  | 0.010899534130  |
| F <sub>14,11,2,2</sub>   | 0.058326922827  | 0.031713727277  |
| F <sub>14,11,3,1</sub>   | 0.022235049636  | -0.031826639666 |
| F <sub>14,11,3,2</sub>   | -0.087632254431 | -0.038366360147 |
| F <sub>14,11,3,3</sub>   | -0.245284874374 | -0.219524050455 |
| F <sub>14,11,4,1</sub>   | 0.007847664570  | 0.010027571402  |
| F <sub>14,11,4,2</sub>   | 0.025286919195  | -0.014823366423 |
| F <sub>14,11,4,3</sub>   | 0.110303285417  | 0.170032732465  |
| F <sub>14,11,4,4</sub>   | 0.060689660554  | 0.056072428071  |
| F <sub>14,11,5,1</sub>   | 0.007847664575  | 0.002615888186  |
| F <sub>14,11,5,2</sub>   | -0.052317763834 | -0.007411683209 |
| F <sub>14,11,5,3</sub>   | 0.011335515542  | 0.038366360152  |
| F <sub>14,11,5,4</sub>   | 0.060601409783  | -0.048393931543 |
| F <sub>14,11,5,5</sub>   | -0.001304076771 | -0.015484771469 |
| F <sub>14,11,6,1</sub>   | 0.009155608662  | -0.030518695561 |
| F <sub>14,11,6,2</sub>   | 0.022235049631  | -0.006975701842 |
| F <sub>14,11,6,3</sub>   | 0.071936925281  | 0.038802341520  |
| F <sub>14,11,6,4</sub>   | 0.010899534138  | -0.023107012366 |
| F <sub>14,11,6,5</sub>   | -0.050573838367 | -0.046214024722 |

|                          |                 |                 |
|--------------------------|-----------------|-----------------|
| F <sub>14,11,6,6</sub>   | 0.025754895692  | -0.020829059173 |
| F <sub>14,11,7,1</sub>   | -0.026594863288 | -0.000435981334 |
| F <sub>14,11,7,2</sub>   | -0.037930378798 | 0.001307944102  |
| F <sub>14,11,7,3</sub>   | 0.023978975052  | 0.029210751468  |
| F <sub>14,11,7,4</sub>   | 0.047957950220  | 0.028338788727  |
| F <sub>14,11,7,5</sub>   | -0.197935539812 | -0.015695329139 |
| F <sub>14,11,7,6</sub>   | -0.000435981355 | -0.032698602446 |
| F <sub>14,11,7,7</sub>   | 0.031999273860  | 0.021925242420  |
| F <sub>14,11,8,1</sub>   | -0.068013092998 | -0.001307944088 |
| F <sub>14,11,8,2</sub>   | 0.070628981171  | -0.043162155167 |
| F <sub>14,11,8,3</sub>   | 0.161313105156  | 0.100711695391  |
| F <sub>14,11,8,4</sub>   | -0.177444415673 | -0.086760291705 |
| F <sub>14,11,8,5</sub>   | -0.046214024721 | -0.050573838369 |
| F <sub>14,11,8,6</sub>   | 0.065833186164  | 0.010027571395  |
| F <sub>14,11,8,7</sub>   | 0.024414956454  | -0.072808888002 |
| F <sub>14,11,8,8</sub>   | -0.087487747923 | -0.106056384174 |
| F <sub>14,11,9,1</sub>   | 0.044034117893  | -0.046214024737 |
| F <sub>14,11,9,2</sub>   | 0.033134583768  | 0.018311217338  |
| F <sub>14,11,9,3</sub>   | -0.065833186122 | -0.032698602397 |
| F <sub>14,11,9,4</sub>   | -0.075424776195 | 0.018747198703  |
| F <sub>14,11,9,5</sub>   | -0.088504217144 | 0.007411683217  |
| F <sub>14,11,9,6</sub>   | 0.086760291699  | 0.001743925470  |
| F <sub>14,11,9,7</sub>   | 0.025722900588  | -0.003923832366 |
| F <sub>14,11,9,8</sub>   | 0.003487850919  | 0.004359813648  |
| F <sub>14,11,9,9</sub>   | 0.019679284462  | -0.004571173475 |
| F <sub>14,12,10,10</sub> | -0.048962722151 | -0.076789060984 |
| F <sub>14,12,1,1</sub>   | -0.119429649917 | -0.086444152865 |
| F <sub>14,12,11,10</sub> | 0.007847664568  | 0.026158881918  |
| F <sub>14,12,11,11</sub> | -0.021246763892 | -0.033377773607 |
| F <sub>14,12,12,10</sub> | 0.198173261459  | 0.152361231550  |
| F <sub>14,12,12,11</sub> | -0.026007805170 | -0.034195510463 |
| F <sub>14,12,12,12</sub> | -0.188426231078 | -0.231644500012 |
| F <sub>14,12,2,1</sub>   | 0.085016366241  | 0.089812161257  |
| F <sub>14,12,2,2</sub>   | -0.192055706965 | -0.220670157683 |
| F <sub>14,12,3,1</sub>   | 0.151285533798  | 0.083708422142  |
| F <sub>14,12,3,2</sub>   | 0.243713583184  | 0.172648620659  |
| F <sub>14,12,3,3</sub>   | -0.045565968419 | -0.011511613673 |
| F <sub>14,12,4,1</sub>   | 0.010027571393  | 0.007411683210  |
| F <sub>14,12,4,2</sub>   | 0.083708422125  | -0.030518695570 |
| F <sub>14,12,4,3</sub>   | -0.084580384870 | 0.035314490587  |
| F <sub>14,12,4,4</sub>   | 0.029816616233  | -0.037895518145 |
| F <sub>14,12,5,1</sub>   | 0.060165428451  | 0.110739266852  |
| F <sub>14,12,5,2</sub>   | -0.087196273055 | -0.013515422383 |
| F <sub>14,12,5,3</sub>   | -0.469115949368 | -0.483067352754 |
| F <sub>14,12,5,4</sub>   | -0.142565906475 | -0.076732720329 |
| F <sub>14,12,5,5</sub>   | 0.035498437580  | 0.009134213421  |
| F <sub>14,12,6,1</sub>   | -0.015259347767 | 0.001743925499  |
| F <sub>14,12,6,2</sub>   | 0.036186453320  | 0.014387385071  |
| F <sub>14,12,6,3</sub>   | 0.069757018369  | -0.022235049630 |
| F <sub>14,12,6,4</sub>   | 0.008283645944  | -0.014823366423 |
| F <sub>14,12,6,5</sub>   | 0.196627595675  | 0.102891602161  |
| F <sub>14,12,6,6</sub>   | -0.048547518382 | -0.101295647266 |

|                          |                 |                 |
|--------------------------|-----------------|-----------------|
| F <sub>14,12,7,1</sub>   | -0.025286919074 | -0.000435981481 |
| F <sub>14,12,7,2</sub>   | -0.027902807238 | -0.001307944136 |
| F <sub>14,12,7,3</sub>   | -0.014387384855 | 0.024414956462  |
| F <sub>14,12,7,4</sub>   | -0.054061689664 | -0.065833186085 |
| F <sub>14,12,7,5</sub>   | -0.022671031248 | -0.013951403734 |
| F <sub>14,12,7,6</sub>   | -0.114663099121 | -0.040110285197 |
| F <sub>14,12,7,7</sub>   | -0.024695117857 | -0.018768593697 |
| F <sub>14,12,8,1</sub>   | 0.052753745204  | 0.039674304237  |
| F <sub>14,12,8,2</sub>   | 0.139078055526  | 0.133410297788  |
| F <sub>14,12,8,3</sub>   | 0.013951403687  | -0.030518695576 |
| F <sub>14,12,8,4</sub>   | 0.038366360136  | 0.022235049636  |
| F <sub>14,12,8,5</sub>   | 0.580727178583  | 0.591626712710  |
| F <sub>14,12,8,6</sub>   | -0.200987409401 | -0.257664986891 |
| F <sub>14,12,8,7</sub>   | 0.055805614762  | 0.024414956482  |
| F <sub>14,12,8,8</sub>   | 0.149472404608  | 0.167887686344  |
| F <sub>14,12,9,1</sub>   | 0.093300012190  | 0.003051869663  |
| F <sub>14,12,9,2</sub>   | 0.035314490561  | 0.013515422318  |
| F <sub>14,12,9,3</sub>   | 0.025286918953  | -0.026594863287 |
| F <sub>14,12,9,4</sub>   | 0.072808888023  | 0.021799068244  |
| F <sub>14,12,9,5</sub>   | 0.057113558750  | 0.047521968753  |
| F <sub>14,12,9,6</sub>   | -0.010899534158 | 0.010027571364  |
| F <sub>14,12,9,7</sub>   | 0.021799068067  | -0.017439253919 |
| F <sub>14,12,9,8</sub>   | 0.011335515498  | 0.075424776210  |
| F <sub>14,12,9,9</sub>   | 0.022615891239  | 0.011384440233  |
| F <sub>14,13,10,10</sub> | 0.186247038964  | 0.156335128970  |
| F <sub>14,13,1,1</sub>   | 0.036554986566  | 0.003813840083  |
| F <sub>14,13,11,10</sub> | 0.136026185971  | 0.005667757752  |
| F <sub>14,13,11,11</sub> | 0.022567177822  | 0.028592588928  |
| F <sub>14,13,12,10</sub> | -0.047085987455 | -0.018311217343 |
| F <sub>14,13,12,11</sub> | -0.058421502947 | -0.040982248341 |
| F <sub>14,13,12,12</sub> | 0.043867981673  | 0.013831505562  |
| F <sub>14,13,13,10</sub> | -0.195144213132 | -0.177801228052 |
| F <sub>14,13,13,11</sub> | 0.008870704058  | 0.020302160201  |
| F <sub>14,13,13,12</sub> | -0.005925133063 | -0.015938518975 |
| F <sub>14,13,13,13</sub> | 0.118102451727  | 0.123388172566  |
| F <sub>14,13,2,1</sub>   | -0.034442527864 | -0.021799068266 |
| F <sub>14,13,2,2</sub>   | 0.071714774077  | 0.083528110339  |
| F <sub>14,13,3,1</sub>   | -0.003051869566 | -0.002615888187 |
| F <sub>14,13,3,2</sub>   | -0.125562633206 | -0.100711695377 |
| F <sub>14,13,3,3</sub>   | 0.156773332120  | 0.099954763084  |
| F <sub>14,13,4,1</sub>   | -0.017439254613 | 0.006539720490  |
| F <sub>14,13,4,2</sub>   | -0.014387385045 | 0.011335515496  |
| F <sub>14,13,4,3</sub>   | 0.021799068266  | 0.030082714197  |
| F <sub>14,13,4,4</sub>   | -0.036408604530 | 0.014446159810  |
| F <sub>14,13,5,1</sub>   | -0.021799068269 | -0.031390658322 |
| F <sub>14,13,5,2</sub>   | -0.001743925468 | -0.037930378769 |
| F <sub>14,13,5,3</sub>   | 0.014387385134  | 0.020491124165  |
| F <sub>14,13,5,4</sub>   | -0.046214024714 | -0.037494397408 |
| F <sub>14,13,5,5</sub>   | 0.031210698949  | 0.039929973867  |
| F <sub>14,13,6,1</sub>   | -0.015695329155 | 0.019619161419  |
| F <sub>14,13,6,2</sub>   | -0.013515422331 | 0.000871962724  |
| F <sub>14,13,6,3</sub>   | 0.075424776214  | 0.023542993727  |



|                          |                 |                 |
|--------------------------|-----------------|-----------------|
| F <sub>14,13,6,4</sub>   | -0.110739266787 | -0.024850937825 |
| F <sub>14,13,6,5</sub>   | -0.116843005881 | 0.007411683220  |
| F <sub>14,13,6,6</sub>   | -0.011262324413 | -0.032471060612 |
| F <sub>14,13,7,1</sub>   | 0.040546266937  | -0.017439254572 |
| F <sub>14,13,7,2</sub>   | 0.050573838340  | 0.063653279350  |
| F <sub>14,13,7,3</sub>   | -0.139514036979 | -0.177880397052 |
| F <sub>14,13,7,4</sub>   | -0.001307943990 | 0.004359813622  |
| F <sub>14,13,7,5</sub>   | 0.003487850999  | 0.015695329167  |
| F <sub>14,13,7,6</sub>   | 0.101147676764  | 0.010899534011  |
| F <sub>14,13,7,7</sub>   | 0.117281858550  | 0.120319311962  |
| F <sub>14,13,8,1</sub>   | -0.007847664580 | 0.008283645941  |
| F <sub>14,13,8,2</sub>   | 0.025722900546  | 0.016131310515  |
| F <sub>14,13,8,3</sub>   | -0.017875235977 | 0.041418229702  |
| F <sub>14,13,8,4</sub>   | -0.093735993536 | -0.071064962535 |
| F <sub>14,13,8,5</sub>   | -0.074552813469 | -0.034006546491 |
| F <sub>14,13,8,6</sub>   | -0.017439254618 | 0.020055142805  |
| F <sub>14,13,8,7</sub>   | -0.041854211075 | 0.043162155160  |
| F <sub>14,13,8,8</sub>   | 0.017990618866  | -0.016775731553 |
| F <sub>14,13,9,1</sub>   | 0.067141130252  | 0.003923832252  |
| F <sub>14,13,9,2</sub>   | -0.002615888184 | 0.016131310519  |
| F <sub>14,13,9,3</sub>   | 0.023107012419  | 0.037058416048  |
| F <sub>14,13,9,4</sub>   | 0.005231776375  | -0.009591590029 |
| F <sub>14,13,9,5</sub>   | 0.006975701875  | -0.018311217328 |
| F <sub>14,13,9,6</sub>   | -0.100275714011 | 0.007411683221  |
| F <sub>14,13,9,7</sub>   | -0.006103739063 | -0.040110285800 |
| F <sub>14,13,9,8</sub>   | 0.027902807379  | 0.019619161431  |
| F <sub>14,13,9,9</sub>   | 0.048874976260  | 0.024909712519  |
| F <sub>14,14,10,10</sub> | 0.533591452870  | 0.517275553019  |
| F <sub>14,14,1,1</sub>   | -0.025977099118 | -0.015719700374 |
| F <sub>14,14,11,10</sub> | 0.119509034272  | 0.129779866912  |
| F <sub>14,14,11,11</sub> | -0.077640520945 | -0.088165035743 |
| F <sub>14,14,12,10</sub> | -0.006940295586 | -0.032133716791 |
| F <sub>14,14,12,11</sub> | -0.065424772235 | -0.024612489634 |
| F <sub>14,14,12,12</sub> | -0.103792513175 | -0.108782417216 |
| F <sub>14,14,13,10</sub> | 0.007223263608  | -0.019438914279 |
| F <sub>14,14,13,11</sub> | -0.096514008136 | -0.059606704885 |
| F <sub>14,14,13,12</sub> | 0.019919126971  | -0.003402083761 |
| F <sub>14,14,13,13</sub> | 0.019363815682  | 0.038775734585  |
| F <sub>14,14,14,10</sub> | -0.638290030074 | -0.640800242145 |
| F <sub>14,14,14,11</sub> | -0.098355532269 | -0.079496402794 |
| F <sub>14,14,14,12</sub> | 0.035086882209  | -0.002390965517 |
| F <sub>14,14,14,13</sub> | 0.004311315386  | 0.016718065187  |
| F <sub>14,14,14,14</sub> | 0.401454329792  | 0.354502527682  |
| F <sub>14,14,2,1</sub>   | -0.049858082587 | -0.005571046166 |
| F <sub>14,14,2,2</sub>   | -0.434503983828 | -0.432808682757 |
| F <sub>14,14,3,1</sub>   | -0.063452708683 | -0.050122988674 |
| F <sub>14,14,3,2</sub>   | 0.512987445233  | 0.458033931474  |
| F <sub>14,14,3,3</sub>   | 0.513122652529  | 0.484109028124  |
| F <sub>14,14,4,1</sub>   | -0.001411318146 | 0.023043227249  |
| F <sub>14,14,4,2</sub>   | -0.012791756054 | -0.034611345474 |
| F <sub>14,14,4,3</sub>   | 0.216519735260  | 0.225013224269  |
| F <sub>14,14,4,4</sub>   | -0.144644130089 | -0.119552287724 |

|                          |                 |                 |
|--------------------------|-----------------|-----------------|
| F <sub>14,14,5,1</sub>   | 0.003296583685  | -0.023482497599 |
| F <sub>14,14,5,2</sub>   | 0.100644506721  | 0.146278850257  |
| F <sub>14,14,5,3</sub>   | -0.095905217659 | -0.098407625716 |
| F <sub>14,14,5,4</sub>   | -0.042855070542 | -0.013693531453 |
| F <sub>14,14,5,5</sub>   | -0.388372607794 | -0.446137182429 |
| F <sub>14,14,6,1</sub>   | -0.039847763317 | -0.032409770173 |
| F <sub>14,14,6,2</sub>   | 0.023003336739  | 0.055625547834  |
| F <sub>14,14,6,3</sub>   | -0.103977848237 | -0.150792967146 |
| F <sub>14,14,6,4</sub>   | -0.017483652727 | -0.007408423931 |
| F <sub>14,14,6,5</sub>   | 0.421057655805  | 0.405212015668  |
| F <sub>14,14,6,6</sub>   | -0.278247930644 | -0.314085020027 |
| F <sub>14,14,7,1</sub>   | 0.006737946656  | -0.019967120964 |
| F <sub>14,14,7,2</sub>   | 0.016935732021  | -0.015983486242 |
| F <sub>14,14,7,3</sub>   | 0.024349071644  | 0.005670794916  |
| F <sub>14,14,7,4</sub>   | 0.012495049225  | -0.053275818159 |
| F <sub>14,14,7,5</sub>   | 0.011219455282  | -0.010569882918 |
| F <sub>14,14,7,6</sub>   | 0.012269946476  | 0.015441593068  |
| F <sub>14,14,7,7</sub>   | 0.016120847269  | 0.022274122959  |
| F <sub>14,14,8,1</sub>   | 0.030625843078  | 0.016874219224  |
| F <sub>14,14,8,2</sub>   | -0.047853765499 | -0.055310495172 |
| F <sub>14,14,8,3</sub>   | -0.958624120307 | -0.920627175398 |
| F <sub>14,14,8,4</sub>   | -0.082825040317 | -0.073043397262 |
| F <sub>14,14,8,5</sub>   | 0.038183064929  | 0.068573812265  |
| F <sub>14,14,8,6</sub>   | 0.086084696572  | 0.051658478902  |
| F <sub>14,14,8,7</sub>   | -0.050986164945 | -0.068824438881 |
| F <sub>14,14,8,8</sub>   | 0.882629630801  | 0.853855604597  |
| F <sub>14,14,9,1</sub>   | -0.021038241665 | -0.002727351909 |
| F <sub>14,14,9,2</sub>   | 0.012262300127  | 0.050430116892  |
| F <sub>14,14,9,3</sub>   | -0.087447112698 | -0.107053431409 |
| F <sub>14,14,9,4</sub>   | 0.014424677950  | 0.012386835269  |
| F <sub>14,14,9,5</sub>   | -0.047303440722 | -0.047652169655 |
| F <sub>14,14,9,6</sub>   | 0.021717587799  | 0.036295787716  |
| F <sub>14,14,9,7</sub>   | -0.023806141237 | 0.001341187010  |
| F <sub>14,14,9,8</sub>   | 0.058368212406  | 0.037596042894  |
| F <sub>14,14,9,9</sub>   | 0.021666190342  | 0.030733238600  |
| F <sub>15,10,10,10</sub> | 0.158662970328  | 0.163338240665  |
| F <sub>15,10,1,1</sub>   | -0.104506895847 | -0.080373009466 |
| F <sub>15,10,2,1</sub>   | 0.051445801097  | 0.030518695573  |
| F <sub>15,10,2,2</sub>   | 0.067972957820  | 0.059309794403  |
| F <sub>15,10,3,1</sub>   | 0.312598638909  | 0.374943974164  |
| F <sub>15,10,3,2</sub>   | -0.007847664551 | -0.125562633208 |
| F <sub>15,10,3,3</sub>   | -0.606701172985 | -0.576322908367 |
| F <sub>15,10,4,1</sub>   | -0.055805614758 | -0.089376179881 |
| F <sub>15,10,4,2</sub>   | -0.081528515298 | -0.017875235976 |
| F <sub>15,10,4,3</sub>   | 0.214502831735  | 0.186600024355  |
| F <sub>15,10,4,4</sub>   | 0.075342449275  | 0.073936266007  |
| F <sub>15,10,5,1</sub>   | 0.030518695566  | 0.007411683190  |
| F <sub>15,10,5,2</sub>   | -0.084144403515 | -0.092864030798 |
| F <sub>15,10,5,3</sub>   | -0.095043937587 | -0.105507490400 |
| F <sub>15,10,5,4</sub>   | 0.015695329166  | 0.027466826017  |
| F <sub>15,10,5,5</sub>   | 0.131710620695  | 0.150218941047  |
| F <sub>15,10,6,1</sub>   | 0.010027571395  | 0.059293465677  |

|                          |                 |                 |
|--------------------------|-----------------|-----------------|
| F <sub>15,10,6,2</sub>   | 0.058421502944  | -0.000871962736 |
| F <sub>15,10,6,3</sub>   | 0.151721515147  | 0.189215912541  |
| F <sub>15,10,6,4</sub>   | 0.087196273058  | 0.074988794840  |
| F <sub>15,10,6,5</sub>   | -0.153465440572 | -0.046650006076 |
| F <sub>15,10,6,6</sub>   | -0.112832733513 | -0.074972466084 |
| F <sub>15,10,7,1</sub>   | 0.041418229666  | 0.038366360182  |
| F <sub>15,10,7,2</sub>   | -0.047957950221 | 0.002615888223  |
| F <sub>15,10,7,3</sub>   | -0.313906583044 | -0.213630869006 |
| F <sub>15,10,7,4</sub>   | 0.212758906309  | 0.206655167141  |
| F <sub>15,10,7,5</sub>   | 0.018311217421  | 0.002179906840  |
| F <sub>15,10,7,6</sub>   | -0.428133700721 | -0.288183682549 |
| F <sub>15,10,7,7</sub>   | -0.145798550436 | -0.099612445216 |
| F <sub>15,10,8,1</sub>   | 0.040982248342  | 0.082836459412  |
| F <sub>15,10,8,2</sub>   | 0.094607956266  | 0.080220571212  |
| F <sub>15,10,8,3</sub>   | -0.051881782474 | -0.015695329147 |
| F <sub>15,10,8,4</sub>   | -0.059293465684 | -0.089376179886 |
| F <sub>15,10,8,5</sub>   | -0.017439254618 | 0.059293465681  |
| F <sub>15,10,8,6</sub>   | -0.070192999817 | -0.064525242071 |
| F <sub>15,10,8,7</sub>   | 0.273796297416  | 0.242841620475  |
| F <sub>15,10,8,8</sub>   | -0.664982036736 | -0.734288801801 |
| F <sub>15,10,9,1</sub>   | 0.002179906825  | -0.003051869581 |
| F <sub>15,10,9,2</sub>   | 0.170468713832  | 0.128178521389  |
| F <sub>15,10,9,3</sub>   | 0.239353769589  | 0.273360316041  |
| F <sub>15,10,9,4</sub>   | -0.078476645753 | -0.105943471764 |
| F <sub>15,10,9,5</sub>   | -0.122074782265 | -0.102455620838 |
| F <sub>15,10,9,6</sub>   | 0.043162155165  | 0.130358428232  |
| F <sub>15,10,9,7</sub>   | 0.040982248380  | 0.051881782337  |
| F <sub>15,10,9,8</sub>   | -0.122946745019 | -0.162185067898 |
| F <sub>15,10,9,9</sub>   | 0.032925681706  | 0.037201319975  |
| F <sub>15,11,10,10</sub> | 0.136890199074  | 0.200431055364  |
| F <sub>15,11,1,1</sub>   | -0.063664793860 | -0.046768961674 |
| F <sub>15,11,11,10</sub> | 0.113886348098  | 0.127921294064  |
| F <sub>15,11,11,11</sub> | -0.078195266150 | -0.050132964729 |
| F <sub>15,11,2,1</sub>   | 0.043162155164  | 0.011335515481  |
| F <sub>15,11,2,2</sub>   | -0.051457315623 | -0.038893169267 |
| F <sub>15,11,3,1</sub>   | -0.028338788733 | -0.051009819733 |
| F <sub>15,11,3,2</sub>   | 0.051881782469  | 0.010027571400  |
| F <sub>15,11,3,3</sub>   | 0.194492430035  | 0.192148826510  |
| F <sub>15,11,4,1</sub>   | 0.098531788562  | 0.058421502957  |
| F <sub>15,11,4,2</sub>   | -0.021799068281 | 0.007847664575  |
| F <sub>15,11,4,3</sub>   | -0.063217297970 | -0.047521968817 |
| F <sub>15,11,4,4</sub>   | -0.152548736713 | -0.084460253887 |
| F <sub>15,11,5,1</sub>   | 0.028774770106  | 0.004795795015  |
| F <sub>15,11,5,2</sub>   | -0.041418229695 | 0.003923832286  |
| F <sub>15,11,5,3</sub>   | 0.030082714182  | -0.023978975095 |
| F <sub>15,11,5,4</sub>   | 0.041854211068  | 0.004359813646  |
| F <sub>15,11,5,5</sub>   | -0.069684149498 | -0.018809898644 |
| F <sub>15,11,6,1</sub>   | -0.005231776383 | -0.057113558852 |
| F <sub>15,11,6,2</sub>   | 0.026594863292  | 0.002615888206  |
| F <sub>15,11,6,3</sub>   | 0.209271055331  | 0.175700490213  |
| F <sub>15,11,6,4</sub>   | 0.160877123793  | 0.139950018259  |
| F <sub>15,11,6,5</sub>   | 0.125126651841  | 0.077604683021  |

|                          |                 |                 |
|--------------------------|-----------------|-----------------|
| F <sub>15,11,6,6</sub>   | -0.085154456000 | -0.097286544393 |
| F <sub>15,11,7,1</sub>   | -0.036622434672 | -0.010027571418 |
| F <sub>15,11,7,2</sub>   | -0.008283645936 | -0.000871962737 |
| F <sub>15,11,7,3</sub>   | 0.088940198555  | 0.118150949998  |
| F <sub>15,11,7,4</sub>   | 0.016567291873  | -0.047957950191 |
| F <sub>15,11,7,5</sub>   | 0.058421502926  | 0.004795795013  |
| F <sub>15,11,7,6</sub>   | 0.160005161063  | 0.171340676600  |
| F <sub>15,11,7,7</sub>   | 0.018749748129  | 0.054716249049  |
| F <sub>15,11,8,1</sub>   | 0.061473372502  | -0.010027571399 |
| F <sub>15,11,8,2</sub>   | 0.068013092986  | 0.016567291879  |
| F <sub>15,11,8,3</sub>   | -0.370148179141 | -0.395435098317 |
| F <sub>15,11,8,4</sub>   | 0.007411683207  | 0.036186453316  |
| F <sub>15,11,8,5</sub>   | -0.078040664385 | 0.035750471959  |
| F <sub>15,11,8,6</sub>   | 0.061473372500  | 0.095043937634  |
| F <sub>15,11,8,7</sub>   | -0.161749086531 | -0.132974316419 |
| F <sub>15,11,8,8</sub>   | -0.438496256727 | -0.377495987028 |
| F <sub>15,11,9,1</sub>   | 0.033570565131  | -0.006975701834 |
| F <sub>15,11,9,2</sub>   | 0.097223844458  | -0.009591590044 |
| F <sub>15,11,9,3</sub>   | -0.159133198352 | -0.131666372320 |
| F <sub>15,11,9,4</sub>   | -0.004359813653 | 0.052317763843  |
| F <sub>15,11,9,5</sub>   | 0.060601409774  | 0.052753745199  |
| F <sub>15,11,9,6</sub>   | -0.041418229707 | -0.034006546494 |
| F <sub>15,11,9,7</sub>   | -0.039674304262 | -0.053625707876 |
| F <sub>15,11,9,8</sub>   | 0.031826639674  | -0.038366360140 |
| F <sub>15,11,9,9</sub>   | -0.160480784824 | -0.097736589650 |
| F <sub>15,12,10,10</sub> | -0.050679442642 | -0.057715276047 |
| F <sub>15,12,1,1</sub>   | 0.117519533536  | 0.092802244940  |
| F <sub>15,12,11,10</sub> | 0.137334130065  | 0.090684123984  |
| F <sub>15,12,11,11</sub> | 0.016150272346  | 0.008055627056  |
| F <sub>15,12,12,10</sub> | 0.002524250781  | 0.018240839170  |
| F <sub>15,12,12,11</sub> | 0.102323105116  | 0.103331777001  |
| F <sub>15,12,12,12</sub> | -0.313521143160 | -0.352175647467 |
| F <sub>15,12,2,1</sub>   | 0.015695329155  | -0.026594863278 |
| F <sub>15,12,2,2</sub>   | 0.067058206491  | 0.049541642380  |
| F <sub>15,12,3,1</sub>   | -0.069757018442 | -0.055805614757 |
| F <sub>15,12,3,2</sub>   | 0.003923832283  | -0.088940198522 |
| F <sub>15,12,3,3</sub>   | 0.145141062591  | 0.154177170047  |
| F <sub>15,12,4,1</sub>   | -0.076296738937 | -0.051009819741 |
| F <sub>15,12,4,2</sub>   | -0.082836459405 | 0.010899534134  |
| F <sub>15,12,4,3</sub>   | 0.051881782476  | 0.108559359968  |
| F <sub>15,12,4,4</sub>   | 0.058788624466  | 0.027826957613  |
| F <sub>15,12,5,1</sub>   | 0.022235049638  | -0.020927105524 |
| F <sub>15,12,5,2</sub>   | 0.017875235978  | -0.006539720486 |
| F <sub>15,12,5,3</sub>   | 0.019619161407  | 0.034878509222  |
| F <sub>15,12,5,4</sub>   | 0.020491124165  | -0.006103739121 |
| F <sub>15,12,5,5</sub>   | -0.048322152281 | -0.114387350995 |
| F <sub>15,12,6,1</sub>   | 0.021799068268  | 0.023542993731  |
| F <sub>15,12,6,2</sub>   | -0.024850937825 | 0.023978975087  |
| F <sub>15,12,6,3</sub>   | -0.211450962179 | -0.180060303866 |
| F <sub>15,12,6,4</sub>   | 0.031390658295  | 0.037494397421  |
| F <sub>15,12,6,5</sub>   | 0.099403751279  | -0.014387385061 |
| F <sub>15,12,6,6</sub>   | 0.195658645315  | 0.175216786880  |

|                          |                 |                 |
|--------------------------|-----------------|-----------------|
| F <sub>15,12,7,1</sub>   | -0.061909353865 | 0.020491124160  |
| F <sub>15,12,7,2</sub>   | -0.073244869364 | -0.000000000001 |
| F <sub>15,12,7,3</sub>   | -0.039238322832 | -0.054061689284 |
| F <sub>15,12,7,4</sub>   | 0.119022912699  | 0.072808888007  |
| F <sub>15,12,7,5</sub>   | 0.039674304212  | 0.000871962714  |
| F <sub>15,12,7,6</sub>   | -0.043598136533 | -0.108559359918 |
| F <sub>15,12,7,7</sub>   | -0.026101166474 | -0.056556532433 |
| F <sub>15,12,8,1</sub>   | 0.002179906827  | -0.050137857008 |
| F <sub>15,12,8,2</sub>   | 0.069321037087  | -0.035750471954 |
| F <sub>15,12,8,3</sub>   | 0.155209366049  | 0.181804229330  |
| F <sub>15,12,8,4</sub>   | 0.019619161454  | 0.025286919191  |
| F <sub>15,12,8,5</sub>   | 0.125126651844  | 0.126434595937  |
| F <sub>15,12,8,6</sub>   | -0.197499558480 | -0.088940198523 |
| F <sub>15,12,8,7</sub>   | 0.106815434494  | 0.133410297788  |
| F <sub>15,12,8,8</sub>   | 0.585004068403  | 0.583464111818  |
| F <sub>15,12,9,1</sub>   | 0.004359813655  | -0.019183180058 |
| F <sub>15,12,9,2</sub>   | -0.006103739114 | 0.018747198707  |
| F <sub>15,12,9,3</sub>   | 0.014387385024  | -0.065833186158 |
| F <sub>15,12,9,4</sub>   | -0.031826639665 | 0.032698602396  |
| F <sub>15,12,9,5</sub>   | 0.069321037072  | 0.088504217149  |
| F <sub>15,12,9,6</sub>   | 0.177444415675  | 0.120330856818  |
| F <sub>15,12,9,7</sub>   | 0.095043937616  | 0.090248142688  |
| F <sub>15,12,9,8</sub>   | -0.016567291879 | -0.063653279331 |
| F <sub>15,12,9,9</sub>   | 0.042868272612  | -0.030903951458 |
| F <sub>15,13,10,10</sub> | -0.190502050146 | -0.152539873519 |
| F <sub>15,13,1,1</sub>   | 0.057724176778  | 0.040499746511  |
| F <sub>15,13,11,10</sub> | 0.089376179887  | 0.151285533748  |
| F <sub>15,13,11,11</sub> | 0.022630554439  | 0.008773231642  |
| F <sub>15,13,12,10</sub> | -0.108995341324 | -0.121638800914 |
| F <sub>15,13,12,11</sub> | 0.132538335047  | 0.122074782277  |
| F <sub>15,13,12,12</sub> | -0.046441350439 | -0.055752010414 |
| F <sub>15,13,13,10</sub> | -0.207556484251 | -0.126691823264 |
| F <sub>15,13,13,11</sub> | 0.014753133736  | 0.063657472757  |
| F <sub>15,13,13,12</sub> | -0.064381714123 | -0.124794123257 |
| F <sub>15,13,13,13</sub> | -0.036088348805 | -0.027549614689 |
| F <sub>15,13,2,1</sub>   | 0.013079440956  | -0.006103739115 |
| F <sub>15,13,2,2</sub>   | -0.028403238742 | -0.001973276819 |
| F <sub>15,13,3,1</sub>   | -0.023107012365 | 0.064089260698  |
| F <sub>15,13,3,2</sub>   | -0.009155608670 | 0.006103739114  |
| F <sub>15,13,3,3</sub>   | -0.262089250535 | -0.258892876211 |
| F <sub>15,13,4,1</sub>   | 0.039238322877  | -0.007847664575 |
| F <sub>15,13,4,2</sub>   | -0.031826639669 | -0.002615888196 |
| F <sub>15,13,4,3</sub>   | 0.065833186166  | 0.119458894093  |
| F <sub>15,13,4,4</sub>   | -0.043423499977 | -0.037920643580 |
| F <sub>15,13,5,1</sub>   | 0.004359813652  | -0.017439254615 |
| F <sub>15,13,5,2</sub>   | -0.090684123987 | -0.003051869559 |
| F <sub>15,13,5,3</sub>   | -0.029646732823 | -0.006975701852 |
| F <sub>15,13,5,4</sub>   | 0.008719627301  | 0.027902807388  |
| F <sub>15,13,5,5</sub>   | 0.011031978955  | -0.011424227692 |
| F <sub>15,13,6,1</sub>   | 0.008719627306  | 0.019183180074  |
| F <sub>15,13,6,2</sub>   | 0.012207478227  | -0.001307944102 |
| F <sub>15,13,6,3</sub>   | -0.055805614755 | -0.070628981183 |

|                          |                 |                 |
|--------------------------|-----------------|-----------------|
| F <sub>15,13,6,4</sub>   | 0.221478533575  | 0.162621049254  |
| F <sub>15,13,6,5</sub>   | -0.047085987449 | -0.015695329148 |
| F <sub>15,13,6,6</sub>   | -0.191994698127 | -0.191442339815 |
| F <sub>15,13,7,1</sub>   | -0.028774770117 | -0.096351881721 |
| F <sub>15,13,7,2</sub>   | -0.059293465695 | 0.010463552777  |
| F <sub>15,13,7,3</sub>   | 0.031390658279  | -0.032262621029 |
| F <sub>15,13,7,4</sub>   | 0.139078055548  | 0.093300012166  |
| F <sub>15,13,7,5</sub>   | 0.020491124194  | 0.005231776390  |
| F <sub>15,13,7,6</sub>   | -0.149105626935 | -0.122946745037 |
| F <sub>15,13,7,7</sub>   | 0.023576991099  | 0.018841317391  |
| F <sub>15,13,8,1</sub>   | 0.012643459596  | -0.008283645942 |
| F <sub>15,13,8,2</sub>   | 0.041854211069  | -0.017439254618 |
| F <sub>15,13,8,3</sub>   | 0.112919173619  | 0.074552813470  |
| F <sub>15,13,8,4</sub>   | -0.114663099079 | -0.105071509034 |
| F <sub>15,13,8,5</sub>   | -0.000435981368 | 0.005231776385  |
| F <sub>15,13,8,6</sub>   | -0.064961223429 | -0.019619161439 |
| F <sub>15,13,8,7</sub>   | -0.039238322873 | -0.017003273251 |
| F <sub>15,13,8,8</sub>   | 0.127706217891  | 0.137597015730  |
| F <sub>15,13,9,1</sub>   | 0.054933652024  | -0.018747198719 |
| F <sub>15,13,9,2</sub>   | 0.055369633395  | 0.016567291882  |
| F <sub>15,13,9,3</sub>   | 0.063217297986  | 0.072808888008  |
| F <sub>15,13,9,4</sub>   | -0.020491124171 | -0.030518695571 |
| F <sub>15,13,9,5</sub>   | 0.027030844654  | 0.025286919189  |
| F <sub>15,13,9,6</sub>   | 0.086324310331  | 0.087632254428  |
| F <sub>15,13,9,7</sub>   | 0.000871962742  | -0.045778043397 |
| F <sub>15,13,9,8</sub>   | 0.042290192433  | 0.143873850550  |
| F <sub>15,13,9,9</sub>   | 0.050242174022  | 0.069752689720  |
| F <sub>15,14,10,10</sub> | 0.241773108476  | 0.241857963689  |
| F <sub>15,14,1,1</sub>   | 0.106251433071  | 0.005041089460  |
| F <sub>15,14,11,10</sub> | 0.009591590034  | -0.026158881922 |
| F <sub>15,14,11,11</sub> | 0.018239234193  | 0.004434968746  |
| F <sub>15,14,12,10</sub> | 0.019619161438  | -0.084144403503 |
| F <sub>15,14,12,11</sub> | 0.013079440964  | -0.016567291877 |
| F <sub>15,14,12,12</sub> | 0.063269880912  | 0.051458673153  |
| F <sub>15,14,13,10</sub> | -0.017439254609 | 0.059729447047  |
| F <sub>15,14,13,11</sub> | 0.020055142803  | -0.014823366419 |
| F <sub>15,14,13,12</sub> | 0.034878509224  | 0.004359813653  |
| F <sub>15,14,13,13</sub> | 0.046266607658  | -0.032997145610 |
| F <sub>15,14,14,10</sub> | -0.093578498744 | -0.076304834050 |
| F <sub>15,14,14,11</sub> | 0.006344921705  | 0.027720151648  |
| F <sub>15,14,14,12</sub> | 0.018766160543  | 0.007993344005  |
| F <sub>15,14,14,13</sub> | 0.017461061101  | 0.018240255581  |
| F <sub>15,14,14,14</sub> | 0.042787520449  | -0.025053911239 |
| F <sub>15,14,2,1</sub>   | -0.025286919182 | 0.007847664569  |
| F <sub>15,14,2,2</sub>   | -0.022236494453 | -0.041369830057 |
| F <sub>15,14,3,1</sub>   | -0.069757018437 | -0.004795795016 |
| F <sub>15,14,3,2</sub>   | -0.111175248158 | -0.005667757750 |
| F <sub>15,14,3,3</sub>   | 0.153731210109  | 0.107820180351  |
| F <sub>15,14,4,1</sub>   | -0.056677577486 | 0.009155608670  |
| F <sub>15,14,4,2</sub>   | -0.014823366421 | 0.016567291893  |
| F <sub>15,14,4,3</sub>   | 0.032262621031  | -0.013515422330 |
| F <sub>15,14,4,4</sub>   | 0.037732039146  | 0.005603646068  |

|                          |                 |                 |
|--------------------------|-----------------|-----------------|
| F <sub>15,14,5,1</sub>   | 0.036186453325  | 0.011335515508  |
| F <sub>15,14,5,2</sub>   | -0.044906080629 | -0.023978975104 |
| F <sub>15,14,5,3</sub>   | 0.060601409732  | 0.064089260701  |
| F <sub>15,14,5,4</sub>   | -0.082400478044 | -0.010899534136 |
| F <sub>15,14,5,5</sub>   | 0.011066856240  | -0.009304103867 |
| F <sub>15,14,6,1</sub>   | 0.034006546498  | -0.027902807375 |
| F <sub>15,14,6,2</sub>   | 0.022671030995  | 0.008719627310  |
| F <sub>15,14,6,3</sub>   | -0.100275714030 | -0.029210751472 |
| F <sub>15,14,6,4</sub>   | 0.016131310509  | 0.017439254616  |
| F <sub>15,14,6,5</sub>   | 0.044906080616  | 0.044906080618  |
| F <sub>15,14,6,6</sub>   | -0.009128925699 | -0.012960721779 |
| F <sub>15,14,7,1</sub>   | 0.055805614776  | -0.007847664592 |
| F <sub>15,14,7,2</sub>   | 0.039674304265  | -0.004795795024 |
| F <sub>15,14,7,3</sub>   | 0.054497670724  | 0.014387385055  |
| F <sub>15,14,7,4</sub>   | 0.110739266736  | -0.006975701839 |
| F <sub>15,14,7,5</sub>   | 0.002615888139  | -0.030082714231 |
| F <sub>15,14,7,6</sub>   | 0.048829912904  | 0.009155608736  |
| F <sub>15,14,7,7</sub>   | -0.035119040521 | -0.046376583784 |
| F <sub>15,14,8,1</sub>   | 0.042726173802  | -0.002615888194 |
| F <sub>15,14,8,2</sub>   | 0.079784589848  | 0.073680850739  |
| F <sub>15,14,8,3</sub>   | -0.119022912729 | -0.116407024531 |
| F <sub>15,14,8,4</sub>   | -0.022235049634 | 0.039238322883  |
| F <sub>15,14,8,5</sub>   | -0.035314490590 | -0.013079440959 |
| F <sub>15,14,8,6</sub>   | 0.067577111623  | 0.042726173798  |
| F <sub>15,14,8,7</sub>   | -0.008719627301 | 0.025286919188  |
| F <sub>15,14,8,8</sub>   | 0.057309008761  | 0.033562709131  |
| F <sub>15,14,9,1</sub>   | 0.038802341509  | -0.002615888183 |
| F <sub>15,14,9,2</sub>   | 0.129486465488  | 0.040110285608  |
| F <sub>15,14,9,3</sub>   | -0.074552813504 | -0.090248142620 |
| F <sub>15,14,9,4</sub>   | 0.159133198338  | 0.037930378779  |
| F <sub>15,14,9,5</sub>   | 0.003923832275  | 0.017875235970  |
| F <sub>15,14,9,6</sub>   | 0.019619161435  | -0.035314490594 |
| F <sub>15,14,9,7</sub>   | 0.014823366389  | 0.039674304337  |
| F <sub>15,14,9,8</sub>   | -0.013515422326 | 0.000871962734  |
| F <sub>15,14,9,9</sub>   | -0.092724836575 | -0.078273543023 |
| F <sub>15,15,10,10</sub> | 0.652061637644  | 0.648983724519  |
| F <sub>15,15,1,1</sub>   | -0.080384287782 | -0.039058697020 |
| F <sub>15,15,11,10</sub> | -0.046288450643 | -0.047726831808 |
| F <sub>15,15,11,11</sub> | 0.131170000367  | 0.131766318420  |
| F <sub>15,15,12,10</sub> | -0.044247843817 | -0.025593996288 |
| F <sub>15,15,12,11</sub> | 0.019467027876  | -0.011533048683 |
| F <sub>15,15,12,12</sub> | 0.270887701776  | 0.250373428651  |
| F <sub>15,15,13,10</sub> | 0.061098103764  | 0.083888669271  |
| F <sub>15,15,13,11</sub> | 0.015906901027  | 0.017624279782  |
| F <sub>15,15,13,12</sub> | 0.057413524389  | 0.072147258541  |
| F <sub>15,15,13,13</sub> | 0.009575184158  | 0.024708921179  |
| F <sub>15,15,14,10</sub> | -0.075249337594 | -0.077774646285 |
| F <sub>15,15,14,11</sub> | 0.072773115603  | 0.020987273772  |
| F <sub>15,15,14,12</sub> | -0.014208779000 | -0.001924832272 |
| F <sub>15,15,14,13</sub> | 0.063549426148  | 0.034696328055  |
| F <sub>15,15,14,14</sub> | 0.030695088418  | 0.028614036066  |
| F <sub>15,15,15,10</sub> | -0.016238220701 | 0.015395230704  |

|                          |                 |                 |
|--------------------------|-----------------|-----------------|
| F <sub>15,15,15,11</sub> | -0.062354609854 | -0.017797680137 |
| F <sub>15,15,15,12</sub> | -0.083758963641 | -0.127136599416 |
| F <sub>15,15,15,13</sub> | -0.024607506185 | 0.006311604683  |
| F <sub>15,15,15,14</sub> | -0.063010624197 | -0.075700413180 |
| F <sub>15,15,15,15</sub> | 0.027485680928  | 0.056464926430  |
| F <sub>15,15,2,1</sub>   | 0.081953616837  | 0.043549520949  |
| F <sub>15,15,2,2</sub>   | -0.157649708999 | -0.142156721232 |
| F <sub>15,15,3,1</sub>   | 0.030355948864  | 0.035038704624  |
| F <sub>15,15,3,2</sub>   | 0.121185525135  | 0.145289965421  |
| F <sub>15,15,3,3</sub>   | -0.084067250899 | -0.087113221929 |
| F <sub>15,15,4,1</sub>   | -0.004971832540 | 0.006403271768  |
| F <sub>15,15,4,2</sub>   | 0.015692359849  | 0.025190765074  |
| F <sub>15,15,4,3</sub>   | -0.126452272643 | -0.121373970482 |
| F <sub>15,15,4,4</sub>   | 0.087974430877  | 0.113512625316  |
| F <sub>15,15,5,1</sub>   | 0.020445184625  | 0.049399054155  |
| F <sub>15,15,5,2</sub>   | 0.020932580812  | 0.045639817640  |
| F <sub>15,15,5,3</sub>   | -0.176343780303 | -0.137427957817 |
| F <sub>15,15,5,4</sub>   | 0.086849384624  | 0.053302271563  |
| F <sub>15,15,5,5</sub>   | 0.119383003981  | 0.125268033622  |
| F <sub>15,15,6,1</sub>   | -0.006204534646 | -0.046651827545 |
| F <sub>15,15,6,2</sub>   | 0.012467120524  | 0.010574140495  |
| F <sub>15,15,6,3</sub>   | 0.282810285823  | 0.175466421169  |
| F <sub>15,15,6,4</sub>   | -0.017628979948 | -0.001595338816 |
| F <sub>15,15,6,5</sub>   | 0.142174908546  | 0.116519687591  |
| F <sub>15,15,6,6</sub>   | -0.369465067024 | -0.365908125813 |
| F <sub>15,15,7,1</sub>   | 0.039073230550  | 0.028136152343  |
| F <sub>15,15,7,2</sub>   | -0.050786705905 | -0.018236061433 |
| F <sub>15,15,7,3</sub>   | -0.036615659421 | -0.039162622222 |
| F <sub>15,15,7,4</sub>   | -0.045417809256 | 0.009142178189  |
| F <sub>15,15,7,5</sub>   | 0.002499828667  | 0.005852088401  |
| F <sub>15,15,7,6</sub>   | 0.042207333469  | 0.068413332267  |
| F <sub>15,15,7,7</sub>   | -0.113547025599 | -0.131596755843 |
| F <sub>15,15,8,1</sub>   | 0.028736590502  | 0.019126789653  |
| F <sub>15,15,8,2</sub>   | 0.070442511638  | 0.030650497331  |
| F <sub>15,15,8,3</sub>   | -0.345198339174 | -0.284821017649 |
| F <sub>15,15,8,4</sub>   | 0.002263989446  | 0.003326005210  |
| F <sub>15,15,8,5</sub>   | 0.057656899391  | 0.052224510679  |
| F <sub>15,15,8,6</sub>   | -0.050232143641 | -0.042949477352 |
| F <sub>15,15,8,7</sub>   | -0.046408360795 | -0.068388458147 |
| F <sub>15,15,8,8</sub>   | -0.250714226435 | -0.247135563010 |
| F <sub>15,15,9,1</sub>   | -0.056643386023 | -0.050031329438 |
| F <sub>15,15,9,2</sub>   | 0.052009268234  | -0.007918722104 |
| F <sub>15,15,9,3</sub>   | 0.040586078701  | 0.123072065937  |
| F <sub>15,15,9,4</sub>   | -0.114262488416 | -0.063909903662 |
| F <sub>15,15,9,5</sub>   | 0.023979510472  | 0.027845270230  |
| F <sub>15,15,9,6</sub>   | -0.127170049235 | -0.157207275228 |
| F <sub>15,15,9,7</sub>   | 0.006276578708  | 0.005991656795  |
| F <sub>15,15,9,8</sub>   | -0.097422462029 | -0.077793691868 |
| F <sub>15,15,9,9</sub>   | -0.141895724127 | -0.141280090848 |

---
